# Supplementary material for: Copper-catalyzed asymmetric allylic C–H amination of alkenes using N-arylhydroxylamines
Source: Royal Society of Chemistry journal article supplement (doi:10.1039/d1qo00223f), 2021-01-01
Supplement: d1qo00223f1.pdf [file d1qo00223f1.pdf]

## Supporting Information

### Copper-Catalyzed Asymmetric Allylic C-H Amination of Alkenes using *N*-arylhydroxylamines

Siva Murru,<sup>\*,1</sup> Bhanudas D. Mokar,<sup>2</sup> Ramesh Bista,<sup>1</sup> Dominique Harakat,<sup>3</sup> Jean Le Bras,<sup>3</sup> Frank Fronczek,<sup>4</sup>  
Kenneth M. Nicholas,<sup>\*,5</sup> and Radhey S. Srivastava<sup>\*,2</sup>

<sup>1</sup>Chemistry Program, School of Sciences, University of Louisiana at Monroe, Louisiana 71209, United States; <sup>2</sup>Department of Chemistry, University of Louisiana at Lafayette, Louisiana 70504, United States; <sup>3</sup>Department of Chemistry, Louisiana State University, Baton Rouge 70803, United States.

<sup>4</sup>Institut de Chimie Moléculaire de Reims - UMR 7312 CNRS-Université de Reims Champagne-Ardenne UFR des Sciences Exactes et Naturelles, BP 1039, 51687 REIMS Cedex 2, France; <sup>5</sup>Department of Chemistry and Biochemistry, University of Oklahoma, Oklahoma 73109, United States.

#### Table of Contents

|                                                                                                     |         |
|-----------------------------------------------------------------------------------------------------|---------|
| 1. General Information                                                                              | S2      |
| 2. General Procedure for the Cu-Catalyzed Asymmetric Allylic C-H Amination                          | S2      |
| 3. Chiral ligand screening data toward the catalytic synthesis of chiral <i>N</i> -aryl allylamines | S2-S3   |
| 4. Synthesis, Isolation and X-Ray Crystallographic Characterization of 4b and 4c                    | S3-S5   |
| 5. Control Experiment with Nitrosobenzene                                                           | S5-S6   |
| 6. Studies on Determination of Absolute Configuration                                               | S6-S9   |
| 7. Characterization Data of the Products                                                            | S9-S16  |
| 8. References                                                                                       | S16     |
| 9. HPLC Chromatograms of the Products                                                               | S17-S40 |
| 10. <sup>1</sup> H and <sup>13</sup> C NMR Spectra of the Products                                  | S41-S80 |

## 1. General Information

All reactions were performed in an atmosphere of argon using standard Schlenk tube or glovebox techniques. Reagent grade solvents were freshly distilled over appropriate drying reagents and stored over activated (250 °C) 4 Å molecular sieves in a Schlenk flask under argon. All organic substrates were received from commercial sources and were used without further purification. Arylhydroxylamines were prepared by following literature methods.<sup>1</sup> Column chromatography was performed on silica gel (60-120 mesh size), and thin layer chromatography was performed on aluminum plates pre-coated with silica gel 60 F<sub>254</sub> (0.25 mm). The <sup>1</sup>H and <sup>13</sup>C NMR spectra were recorded on a Varian 400 MHz and JEOL 400 MHz FT-NMR spectrometers, and the data are reported in parts per million (ppm) relative to TMS, with the residual solvent peak as an internal reference. Multiplicities are reported as: s = singlet, d = doublet, t = triplet, q = quartet, m = multiplet, br = broad; coupling constant(s) in Hz. Mass spectra were recorded from Agilent GC-MS (7890A-5975CVL MSD) spectrometer. Enantioselectivity was measured by GC (HP 5890 series II) Astec Chiraldex columns and HPLC (Agilent 1100 series) using and Chiralcel columns respectively. Optical activity was measured on Autopol III polarimeter. High resolution mass spectra (HRMS) were obtained at Louisiana State University.

The diffraction data were collected at low temperature on a Nonius Kappa CCD equipped with Mo K $\alpha$  ( $\lambda=0.71073$  Å) and a Bruker Kappa Apex II equipped with Cu ( $\lambda=1.54178$  Å) radiation source diffractometer, a graphite monochromator, and an Oxford Cryostream low-temperature device. Absorption collections were made by the multi-scan method.

## 2. General Procedure for the Cu-Catalyzed Asymmetric Allylic C-H Amination of Simple Alkenes:

A Schlenk flask was charged with Cu(MeCN)<sub>4</sub>PF<sub>6</sub> (10 mol %), R-(+)-BINAM (12 mol %) and CH<sub>2</sub>Cl<sub>2</sub> (2 mL). The flask was placed in an oil bath preset at 25 °C and stirred for 0.5 h. An alkene (0.5 mmol) was added and then a solution of arylhydroxylamine (1.5 mmol) in CH<sub>2</sub>Cl<sub>2</sub> (4 mL) was added slowly with the help of a syringe pump over a period of 4 h under a positive pressure of nitrogen. The reaction was allowed to continue for a further 2-4 h to ensure complete consumption of the arylhydroxylamine. The reaction mixture was filtered through a short celite bed by eluting with CH<sub>2</sub>Cl<sub>2</sub> (10 mL), and the filtrate was analyzed by GC-MS. Analytically pure product was isolated by column chromatography on silica gel (230-460 mesh, hexanes/EtOAc). The product was completely characterized by NMR and MS spectroscopic methods and further chiral HPLC is used to measure the enantioselectivity.

## 3. Chiral ligand screening data toward the catalytic synthesis of chiral *N*-aryl allylamines:

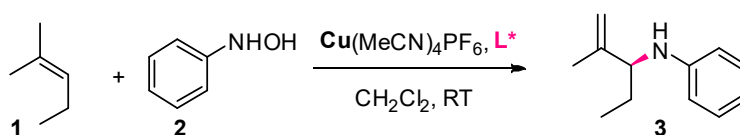

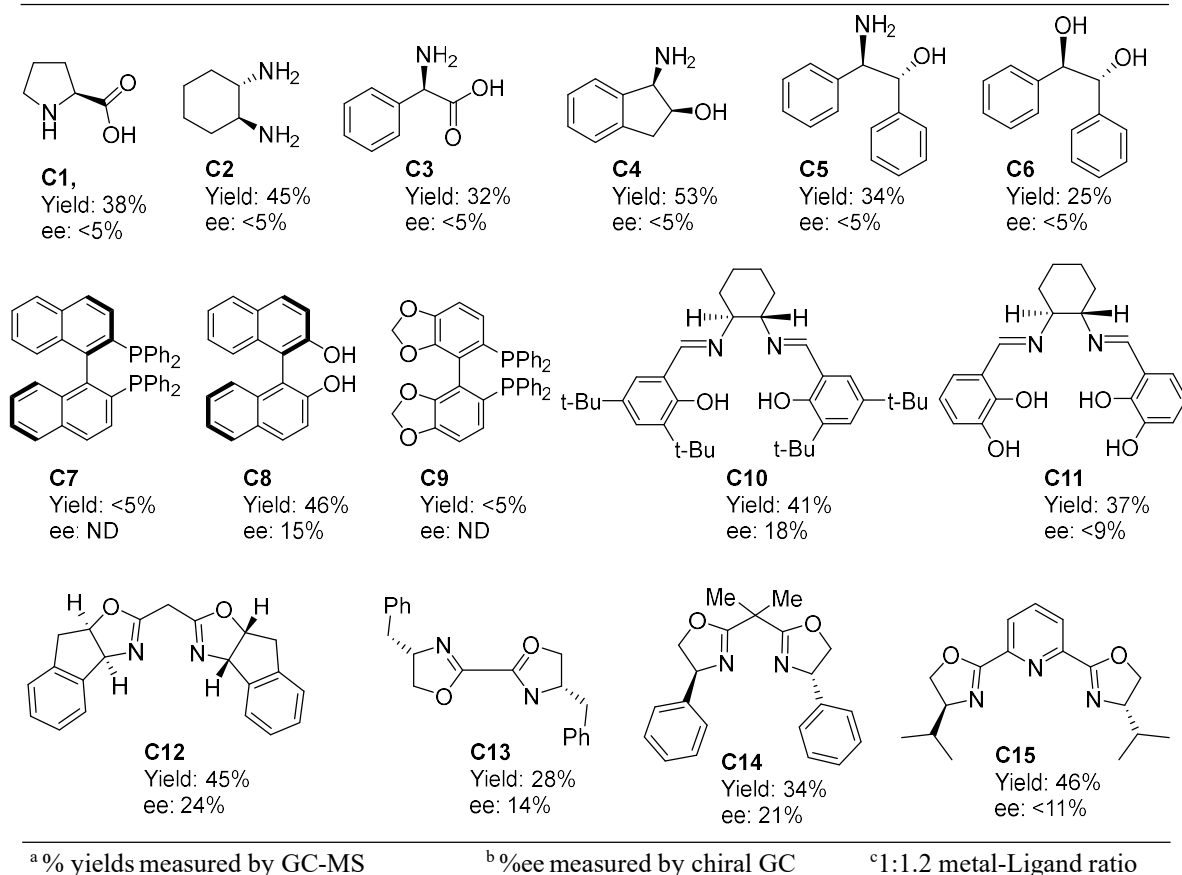

#### 4. Synthesis, Isolation and Characterization of Cu<sup>II</sup>OTf<sub>2</sub>-R(+)-BINAM (4b) and Cu<sup>II</sup>OTf<sub>2</sub>-R(+)-BINAM-pEt<sub>2</sub>PhNO (4c) complexes:

To the mixture of [Cu(OTf)<sub>2</sub>] (0.635 g, 1.76 mmol) and R(+)-BINAM ligand (1.0 g, 3.52 mmol), toluene (10 mL) was added and continued stirring at room temperature for 6 hours. Solvent was removed under vacuum and the crude product which was directly re-crystallized from ethylacetate:hexane mixture(5:1) to obtain pure [Cu(BINAM)<sub>2</sub>OTf<sub>2</sub>] complex **4b** (1.28 g, 78% yield).

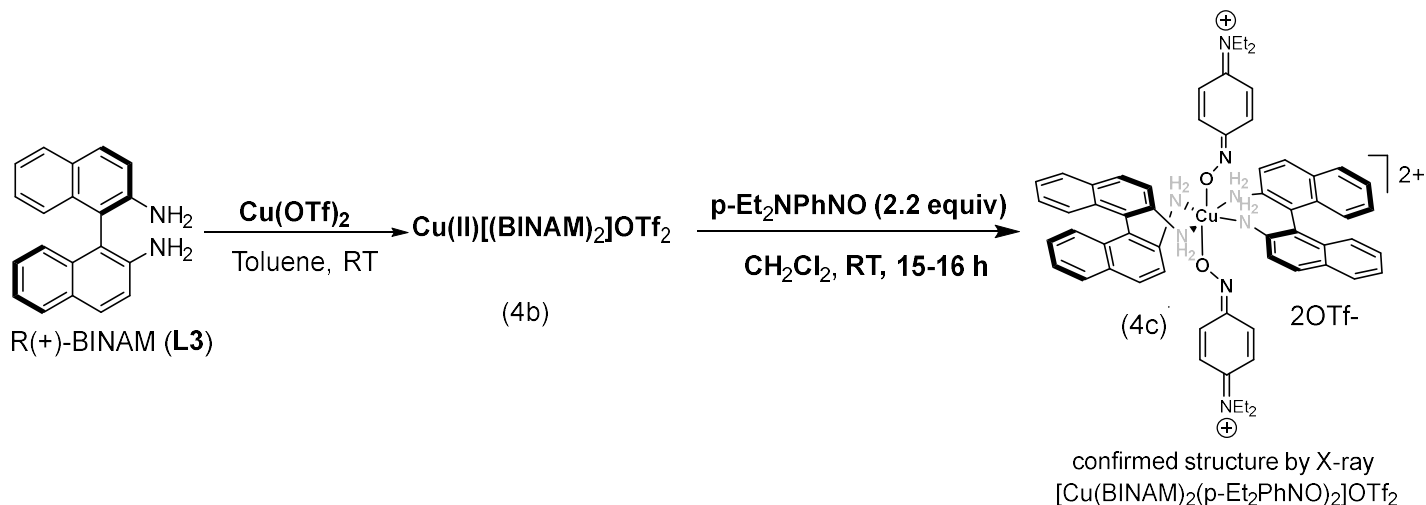

### Scheme S1. Synthesis of Cu-BINAM-Nitroso complex

The Cu-complex (1.28 g, 1.37 mmol) obtained above was dissolved in dichloromethane (10 mL) and added *N,N*-diethyl-4-nitrosoaniline (0.40 g, 2.2 mmol). The dark brown solution becomes dark green immediately. After stirring overnight (15 h), the dark green solution was filtered, and the solvent was removed on rotavap. The solid residue was triturated with diethyl ether (10 mL x 2). Recrystallization from CH<sub>2</sub>Cl<sub>2</sub>/hexane at -20 °C provided dark greenish crystals suitable for X-ray diffraction. The crystal structures of **4b** and **4c** are shown in Figure S1 and Figure S2 respectively. The molecular structure of **4b** is similar to the one reported earlier with CCDC#677060.<sup>2</sup>

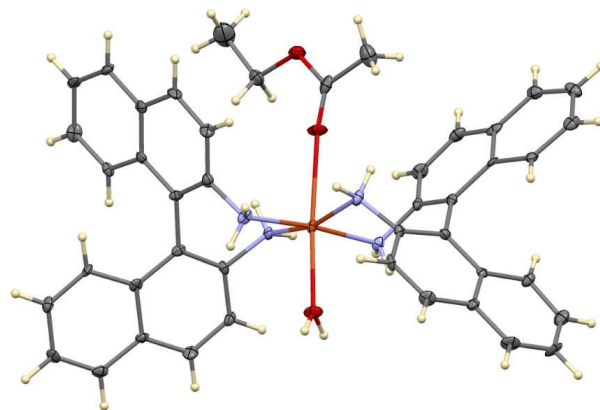

**Figure S1.** Single crystal X-ray structure of **4b**.

However, molecular structure of **4c** is completely novel and the details of X-ray data and structure determination can be found in the additional supplementary materials document. This crystal structure data has been deposited via the joint CCDC/FIZ Karlsruhe deposition service and the data has been assigned to CCDC#2047831.

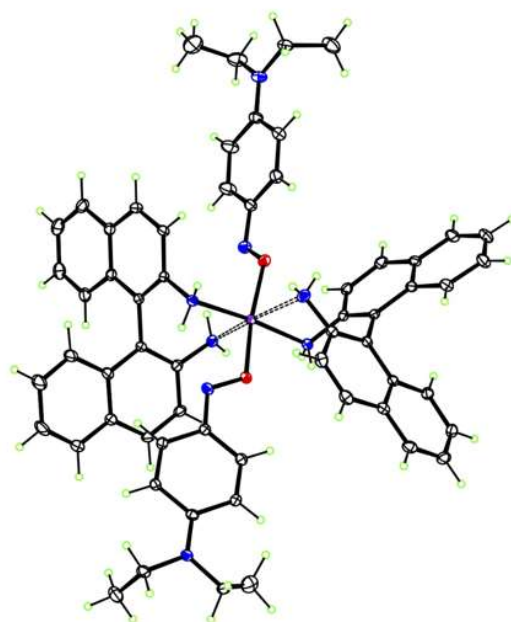



**Figure S2.** Single crystal X-ray structure of complex **4c**.

### 5. Control Experiment with Nitrosobenzene:

A dichloromethane (2.0 mL) solution of  $\text{Cu}(\text{MeCN})_4\text{PF}_6$  (19 mg, 10 mol %) and *R*-(+)-BINAM (28 mg, 20 mol %) was stirred at 25 °C for 0.5 h. 2-methylbut-2-ene (106 mg, 1.5 mmol) was added followed by the slow addition (4 h) of nitrosobenzene (54 mg, 0.5 mmol). The product was isolated by column chromatography and confirmed by both GC-MS and NMR. The racemic product was prepared in the same experimental conditions without the *R*-(+)-BINAM ligand. As shown below, the HPLC analysis of racemic and chiral products indicates 47% enantioselectivity.

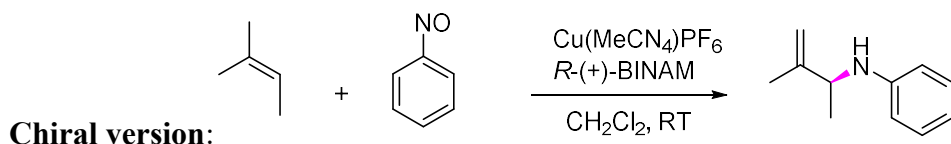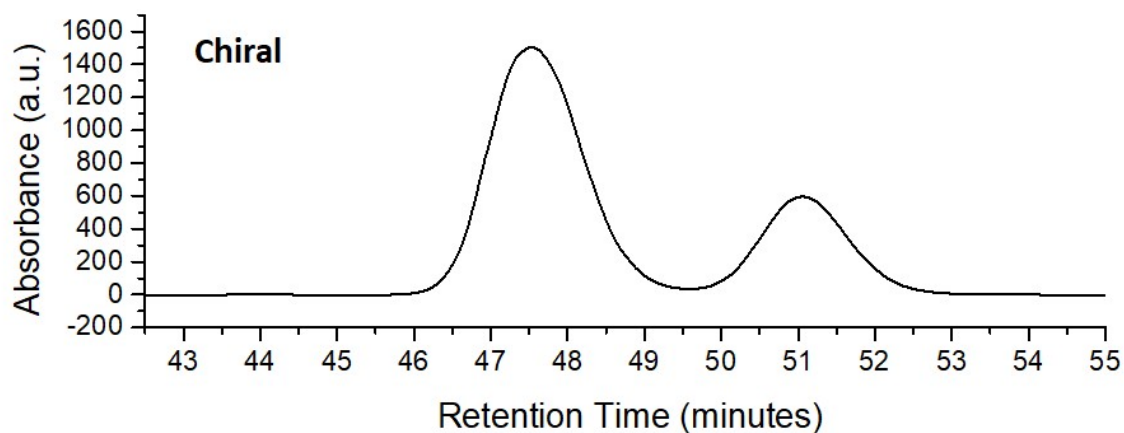

| Peak #   | RetTime [min] | Type | Width [min] | Area [mAU*s] | Height [mAU] | Area %  |
|----------|---------------|------|-------------|--------------|--------------|---------|
| 1        | 47.525        | MM   | 1.4465      | 1.29890e5    | 1496.63745   | 73.6036 |
| 2        | 51.068        | MM   | 1.3431      | 4.65826e4    | 578.06775    | 26.3964 |
| Totals : |               |      |             | 1.76473e5    | 2074.70520   |         |

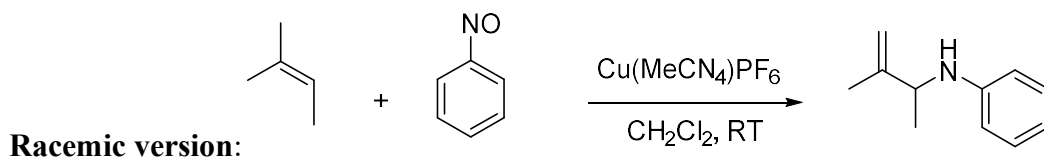

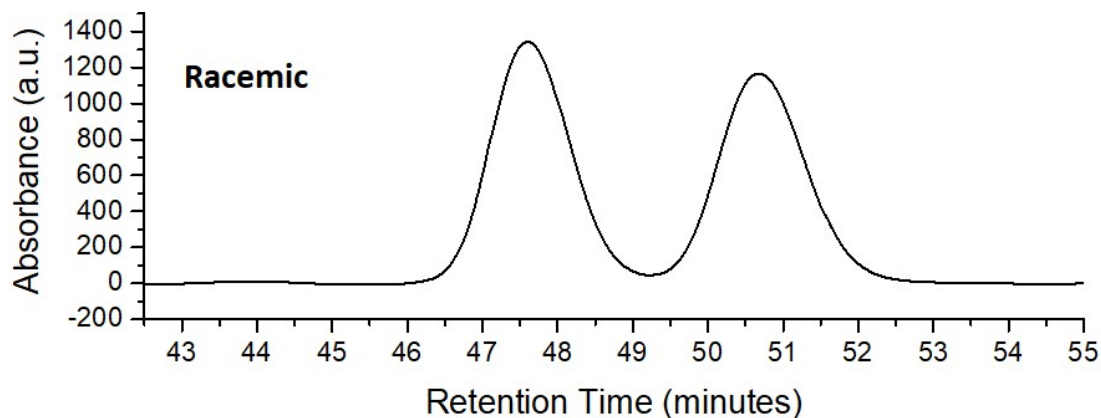

| Peak #   | RetTime [min] | Type | Width [min] | Area [mAU*s] | Height [mAU] | Area %  |
|----------|---------------|------|-------------|--------------|--------------|---------|
| 1        | 47.597        | MM   | 1.2299      | 9.72091e4    | 1317.27100   | 51.2719 |
| 2        | 50.688        | MM   | 1.3548      | 9.23860e4    | 1136.51746   | 48.7281 |
| Totals : |               |      |             | 1.89595e5    | 2453.78845   |         |

## 6. Determination of Absolute Configuration:

In order to determine the absolute configuration of major *N*-aryl allylamine enantiomer, we have synthesized chiral *N*-(3-methylbutan-2-yl)anilines **3a(i)** and **3a(ii)** using two alternate approaches (**Scheme S2** and **Scheme S3**) i.e. Pd-catalyzed hydrogenation and Pd-catalyzed *N*-arylation. The catalytic hydrogenation of allyl double bond of **3a** led to *N*-(3-methylbutan-2-yl)aniline **3a(i)**.<sup>3</sup> Alternatively, Buchwald-Hartwig amination (Pd-catalyzed *N*-arylation)<sup>4</sup> of commercially available chiral R(-)-amine produced the corresponding R(-)-*N*-(3-methylbutan-2-yl)aniline **3a(ii)** in good yield. Additionally, for the comparison purpose, we have synthesized racemic *N*-(3-methylbutan-2-yl)aniline **3a(iii)** via catalytic hydrogenation of racemic version of **3a** (**Scheme S4**).

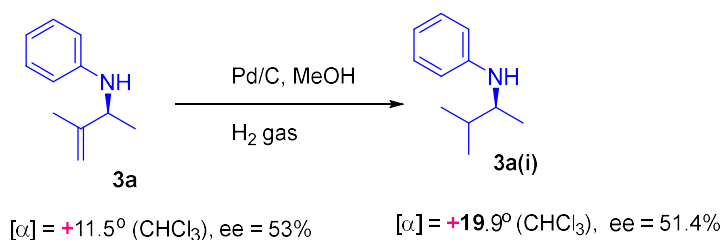

**Scheme S2.** Synthesis of *N*-(3-methylbutan-2-yl)aniline **3a(i)** via catalytic hydrogenation

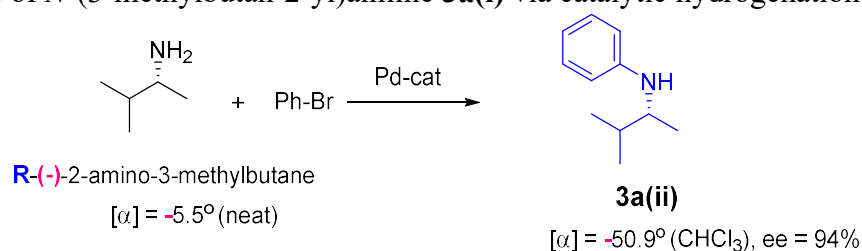

**Scheme S3.** Synthesis of *N*-(3-methylbutan-2-yl)aniline **3a(ii)** via Buchwald-Hartwig amination

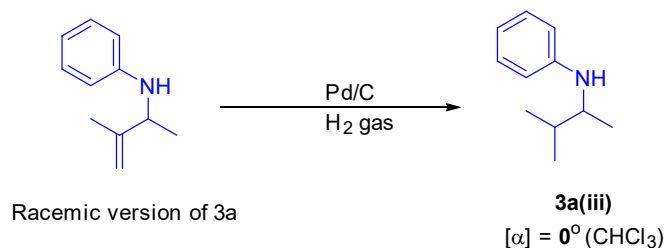

**Scheme S4.** Synthesis of racemic *N*-(3-methylbutan-2-yl)aniline **3a(iii)** via catalytic hydrogenation

HPLC analysis and the optical activity data of **3a(iii)**, **3a(i)**, and **3a(ii)** are provided in the Figures S3, S4 and S5. The structure of **3a(iii)** was confirmed by GC-MS and <sup>1</sup>H-NMR (Figure S6) analysis. In comparison to the racemic mixture (Figure S4), the major enantiomer from the scheme S2 is on the right whereas the major enantiomer from scheme S3 is on the left. This observation clearly indicates that the absolute configuration of the major enantiomer {**3a(i)**} obtained from Cu-catalyzed asymmetric allylic amination is exactly opposite to the R(-)-*N*-(3-methylbutan-2-yl)aniline **3a(ii)** which confirms the stereochemistry of **3a(i)** as S(+)-*N*-(3-methylbutan-2-yl)aniline. In addition to that, optical activity data comparison of **3a(i)** and **3a(ii)** supports the absolute configuration assignment. Accordingly, we assigned “S” configuration to all the products obtained from our Cu-catalyzed asymmetric allylic amination.

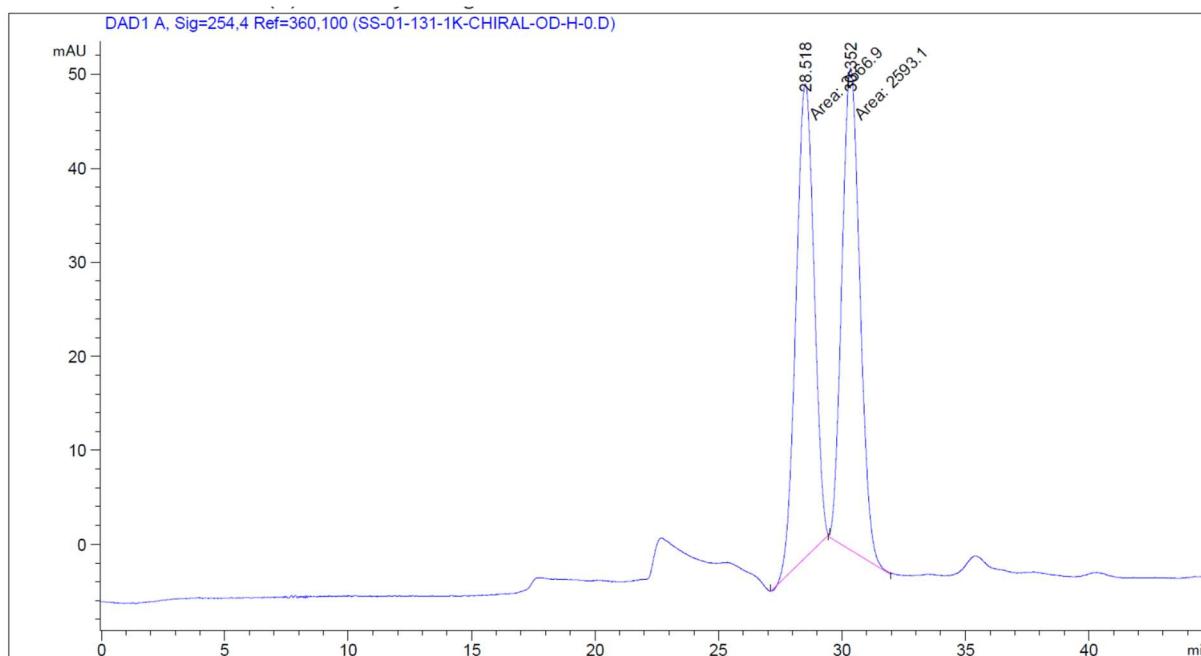

**Figure S3.** HPLC analysis of racemic *N*-(3-methylbutan-2-yl)aniline **3a(iii)**

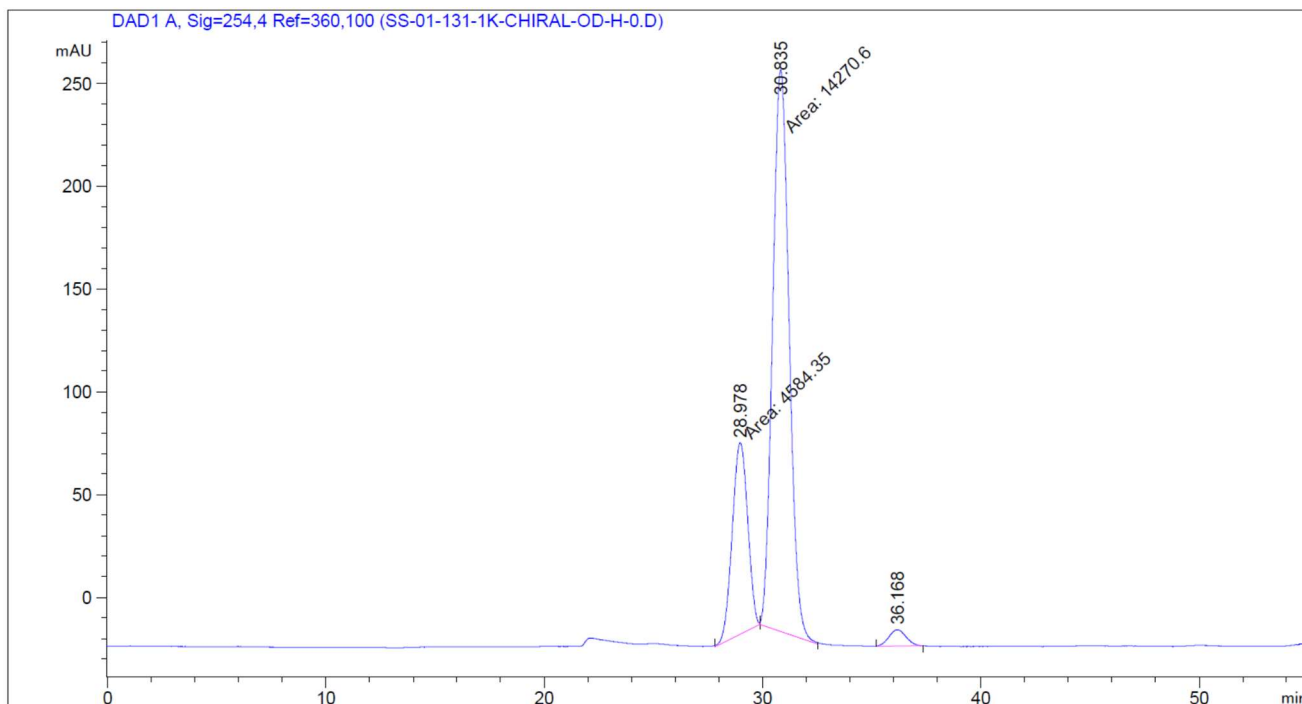

**Figure S4.** HPLC analysis of chiral *N*-(3-methylbutan-2-yl)aniline **3a(i)**

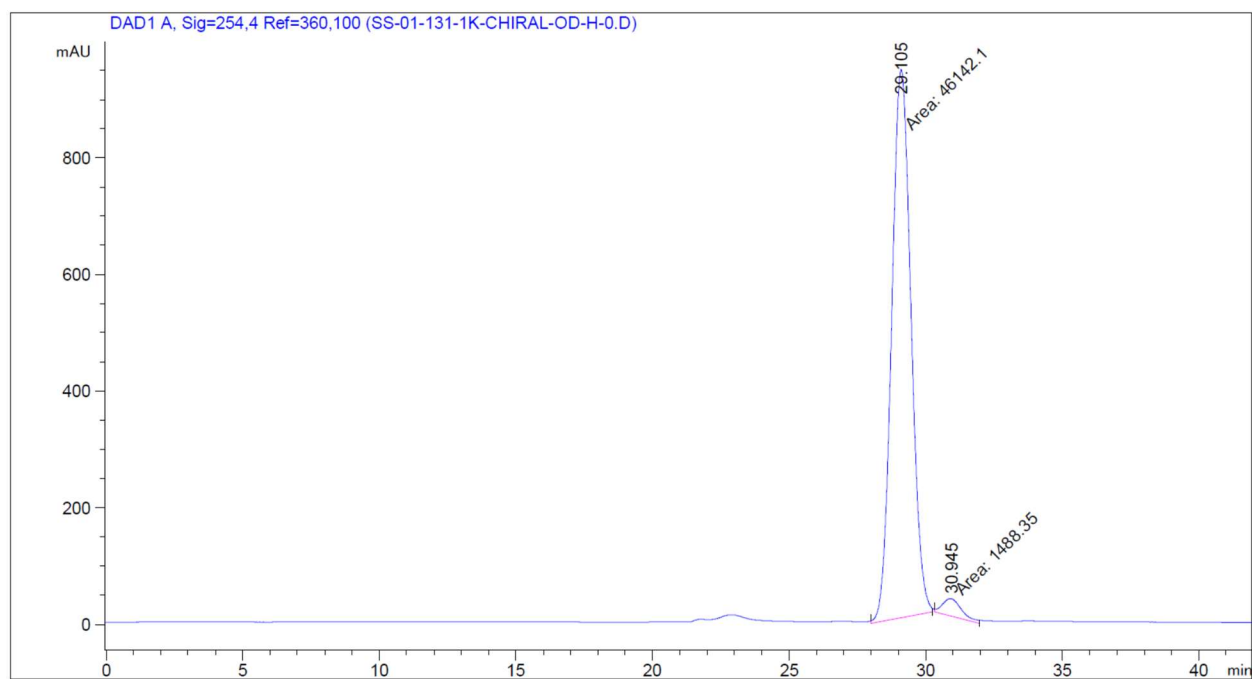

**Figure S5.** HPLC analysis of chiral *N*-(3-methylbutan-2-yl)aniline **3a(ii)**

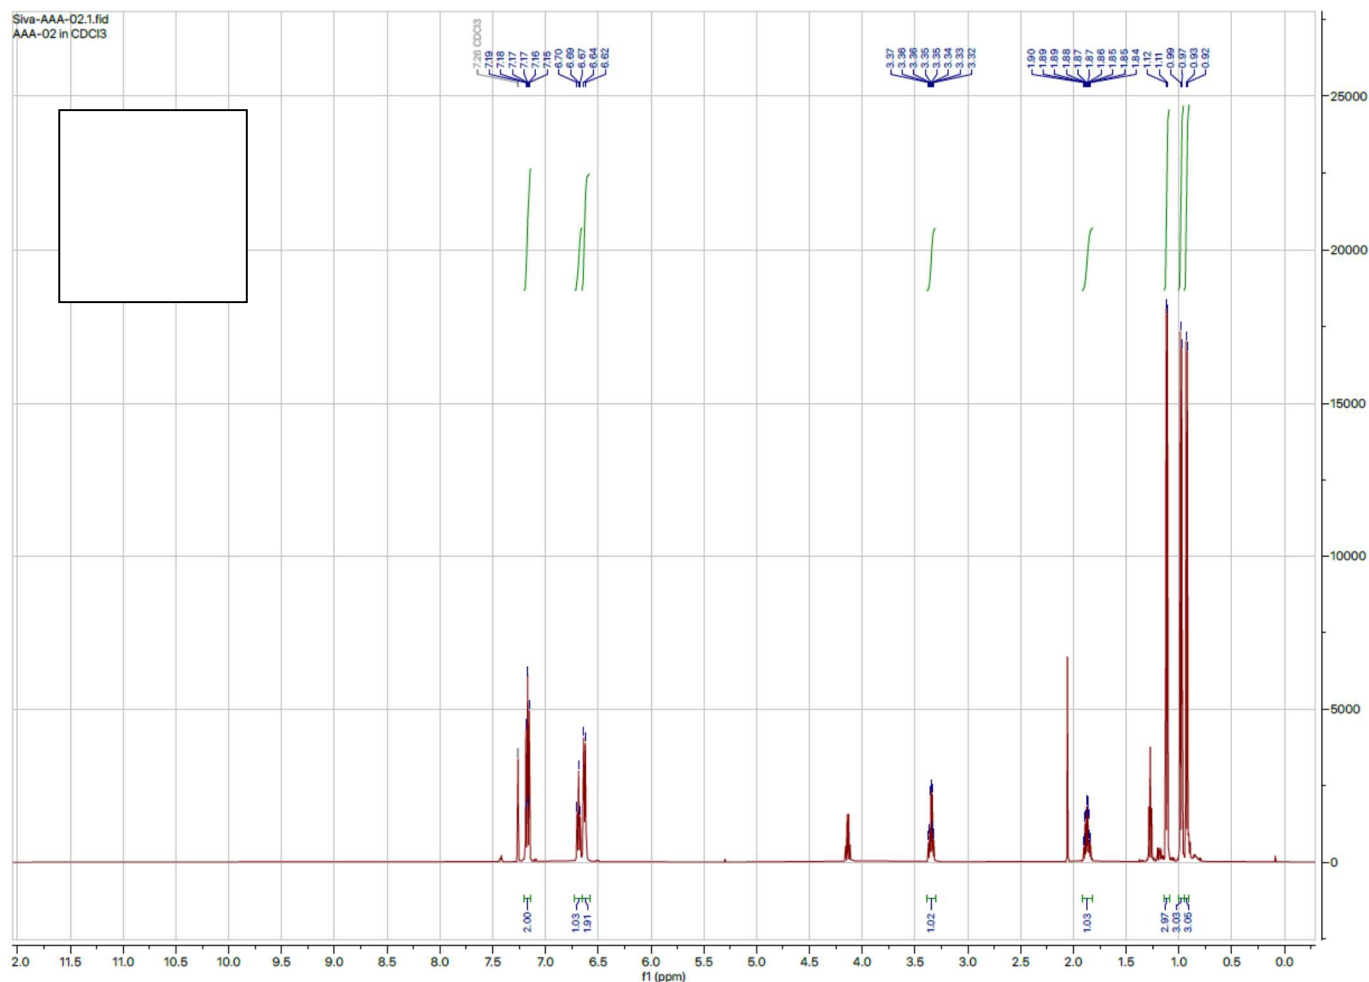

**Figure S6.** NMR analysis of racemic *N*-(3-methylbutan-2-yl)aniline **3a(iii)**

## 7. Characterization Data of the Chiral *N*-Aryl Allylamine Products

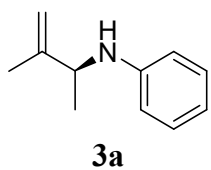

**(*S*)-*N*-(3-methylbut-3-en-2-yl)aniline (**3a**):** A dichloromethane (2.0 mL) solution of  $\text{Cu}(\text{MeCN})_4\text{PF}_6$  (19 mg, 10 mol %) and R-(+)-BINAM (28 mg, 20 mol %) was stirred at 25 °C for 0.5 h. 2-methylbut-2-ene (106 mg, 1.5 mmol) was added followed by the slow addition (4 h) of phenylhydroxylamine (55 mg, 0.5 mmol). The product **3a** was isolated by a column chromatography on silica gel (hexanes/EtOAc = 99:1–98:2; TLC:  $R_f$  = 0.75 (5% EtOAc in hexanes)). Yield = 47 mg (58%). Data for **3a**:  $^1\text{H}$  NMR (400 MHz,  $\text{CDCl}_3$ )  $\delta$  7.16 (t,  $J$  = 7.8 Hz, 2H), 6.70 (t,  $J$  = 7.2 Hz, 1H), 6.61 (d,  $J$  = 8.0 Hz, 2H), 4.99 (s, 1H), 4.86 (s, 1H), 3.89 (q,  $J$  = 6.8 Hz, 1H), 1.73 (s, 3H), 1.34 (d,  $J$  = 6.8 Hz, 3H) ppm;  $^{13}\text{C}\{^1\text{H}\}$  NMR (100 MHz,  $\text{CDCl}_3$ )  $\delta$  147.0, 129.0, 117.4, 113.5, 110.9, 54.8, 21.1, 18.2 ppm; GC-MS for  $\text{C}_{11}\text{H}_{15}\text{N}$ ,  $m/z$  = 161.23 ( $\text{M}^+$ ).  $^1\text{H}$  and  $^{13}\text{C}$  NMR spectral data are in good agreement with the literature data.<sup>5</sup>

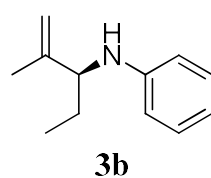

**(*S*)-*N*-(2-methylpent-1-en-3-yl)aniline (**3b**):** A dichloromethane (2.0 mL) solution of  $\text{Cu}(\text{MeCN})_4\text{PF}_6$  (19 mg, 10 mol %) and R-(+)-BINAM (28 mg, 20 mol %) was stirred at 25 °C for 0.5 h. 2-methylpent-2-ene (127 mg, 1.5 mmol) was added followed by the slow addition (4 h) of phenylhydroxylamine (55 mg, 0.5 mmol). The product **3b** was isolated by a column

chromatography on silica gel (hexanes/EtOAc = 99:1–98:2; TLC:  $R_f$  = 0.75 (5% EtOAc in hexanes)). Yield = 59 mg (67%). Data for **3b**:  $^1\text{H}$  NMR (400 MHz,  $\text{CDCl}_3$ )  $\delta$  7.08 (t,  $J$  = 7.2 Hz, 2H), 6.60 (t,  $J$  = 7.4 Hz, 1H), 6.52 (d,  $J$  = 8.4 Hz, 2H), 4.90 (s, 1H), 4.85 (s, 1H), 3.64 (bs, 1H), 3.59 (t,  $J$  = 6.8 Hz, 1H), 1.59 (s, 3H), 1.55 (t,  $J$  = 7.0 Hz, 2H), 0.89 (t,  $J$  = 7.4 Hz, 3H) ppm;  $^{13}\text{C}\{^1\text{H}\}$  NMR (100 MHz,  $\text{CDCl}_3$ )  $\delta$  147.9, 145.6, 129.1, 117.0, 113.3, 112.3, 61.1, 27.3, 17.8, 10.9 ppm; IR (KBr) 3406, 3053, 2964, 2932, 1602, 1505, 1482, 1317, 1260, 1100, 1024, 800, 749, 687  $\text{cm}^{-1}$ . GC-MS for  $\text{C}_{12}\text{H}_{17}\text{N}$ ,  $m/z$  = 175.10 ( $\text{M}^+$ ).  $^1\text{H}$  and  $^{13}\text{C}$  NMR spectral data are in good agreement with the literature data.<sup>6</sup>

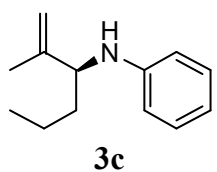

**(S)-N-(2-methylhex-1-en-3-yl)aniline (3c):** A dichloromethane (2.0 mL) solution of  $\text{Cu}(\text{MeCN})_4\text{PF}_6$  (19 mg, 10 mol %) and R-(+)-BINAM (28 mg, 20 mol %) was stirred at 25 °C for 0.5 h. 2-methylhex-2-ene (148 mg, 1.5 mmol) was added followed by the slow addition (4 h) of phenylhydroxylamine (55 mg, 0.5 mmol). The product **3c** was isolated by a column chromatography on silica gel (hexanes/EtOAc = 99:1–98:2; TLC:  $R_f$  = 0.75 (5% EtOAc in hexanes)). Yield = 58 mg (61%). Data for **3c**:  $^1\text{H}$  NMR (400 MHz,  $\text{CDCl}_3$ )  $\delta$  7.15 (t,  $J$  = 7.6 Hz, 2H), 6.67 (t,  $J$  = 7.2 Hz, 1H), 6.58 (d,  $J$  = 8.4 Hz, 2H), 4.98 (s, 1H), 4.91 (s, 1H), 3.76 (t,  $J$  = 6.8 Hz, 1H), 3.70 (bs, 1H), 1.67 (s, 3H), 1.62–1.55 (m, 2H), 1.47–1.36 (m, 2H), 0.96 (t,  $J$  = 7.2 Hz, 3H) ppm;  $^{13}\text{C}\{^1\text{H}\}$  NMR (100 MHz,  $\text{CDCl}_3$ )  $\delta$  147.8, 145.8, 129.0, 116.9, 113.1, 112.0, 59.2, 36.6, 19.5, 17.7, 14.0 ppm; GC-MS for  $\text{C}_{13}\text{H}_{19}\text{N}$ ,  $m/z$  = 189.03 ( $\text{M}^+$ ).  $^1\text{H}$  and  $^{13}\text{C}$  NMR spectral data are in good agreement with the literature data.<sup>7</sup>

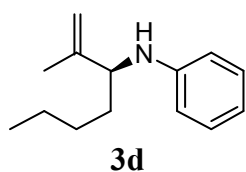

**(S)-N-(2-methylhept-1-en-3-yl)aniline (3d):** A dichloromethane (2.0 mL) solution of  $\text{Cu}(\text{MeCN})_4\text{PF}_6$  (19 mg, 10 mol %) and R-(+)-BINAM (28 mg, 20 mol %) was stirred at 25 °C for 0.5 h. 2-methylhept-2-ene (170 mg, 1.5 mmol) was added followed by the slow addition (4 h) of phenylhydroxylamine (55 mg, 0.5 mmol). The product **3d** was isolated by a column chromatography on silica gel (hexanes/EtOAc = 99:1–98:2; TLC:  $R_f$  = 0.75 (5% EtOAc in hexanes)). Yield = 60 mg (59%). Data for **3d**:  $^1\text{H}$  NMR (400 MHz,  $\text{CDCl}_3$ )  $\delta$  7.13 (d,  $J$  = 7.6, 7.2 Hz, 2H), 6.65 (t,  $J$  = 7.4 Hz, 1H), 6.57 (d,  $J$  = 7.6 Hz, 2H), 4.95 (s, 1H), 4.89 (s, 1H), 3.72 (t,  $J$  = 6.8 Hz, 1H), 3.69 (bs, 1H), 1.65 (s, 3H), 1.58 (q,  $J$  = 3.0 Hz, 2H), 1.37–1.33 (m, 4H), 0.91 (t,  $J$  = 7.2 Hz, 3H) ppm;  $^{13}\text{C}\{^1\text{H}\}$  NMR (100 MHz,  $\text{CDCl}_3$ )  $\delta$  147.9, 146.0, 129.1, 117.0, 113.2, 112.0, 59.5, 34.3, 28.6, 22.7, 17.7, 14.1 ppm; IR (KBr): 3410, 3052, 2956, 2929, 2857, 1648, 1601, 1505, 1373, 1317, 1257, 1153, 894, 748, 690  $\text{cm}^{-1}$ . GC-MS for  $\text{C}_{14}\text{H}_{21}\text{N}$ ,  $m/z$  = 203.12 ( $\text{M}^+$ ).  $^1\text{H}$  and  $^{13}\text{C}$  NMR spectral data are in good agreement with the literature data.<sup>6</sup>

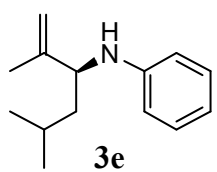

**(S)-N-(2,5-dimethylhex-1-en-3-yl)aniline (3e):** A dichloromethane (2.0 mL) solution of  $\text{Cu}(\text{MeCN})_4\text{PF}_6$  (19 mg, 10 mol %) and R-(+)-BINAM (28 mg, 20 mol %) was stirred at 25 °C for 0.5 h. 2,5-dimethylhex-2-ene (170 mg, 1.5 mmol) was added followed by the slow addition (4 h) of phenylhydroxylamine (55 mg, 0.5 mmol). The product **3e** was isolated by a column chromatography on silica gel (hexanes/EtOAc = 99:1–98:2; TLC:  $R_f$  = 0.75 (5% EtOAc in hexanes)). Yield = 66 mg (65%). Data for **3e**:  $^1\text{H}$  NMR (400 MHz,  $\text{CDCl}_3$ )  $\delta$  7.14 (t,  $J$  = 8.0 Hz, 2H), 6.66 (t,  $J$  = 7.6 Hz, 1H), 6.57 (d,

$J = 7.6$  Hz, 2H), 4.98 (s, 1H), 4.88 (s, 1H), 3.81 (t,  $J = 7.0$  Hz, 1H), 3.66 (bs, 1H), 1.78–1.66 (m, 1H), 1.57 (s, 3H), 1.45 (t,  $J = 6.6$  Hz, 2H), 0.95 (d,  $J = 6.8$  Hz, 3H), 0.92 (d,  $J = 6.8$  Hz, 3H) ppm;  $^{13}\text{C}\{^1\text{H}\}$  NMR (100 MHz,  $\text{CDCl}_3$ )  $\delta$  147.7, 146.1, 129.0, 116.9, 113.1, 111.8, 57.4, 44.0, 24.9, 22.8, 22.5, 17.5 ppm; GC-MS for  $\text{C}_{14}\text{H}_{21}\text{N}$ ,  $m/z = 203.16$  ( $\text{M}^+$ ); HRMS (IT-TOF/ESI) Calcd for  $\text{C}_{14}\text{H}_{22}\text{N}$  ( $[\text{M}+\text{H}]^+$ ) 204.1747, Found 204.1746.

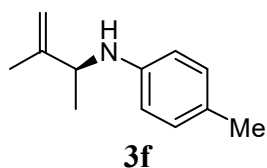

**(S)-4-methyl-N-(3-methylbut-3-en-2-yl)aniline (3f):** A dichloromethane (2.0 mL) solution of  $\text{Cu}(\text{MeCN})_4\text{PF}_6$  (17 mg, 10 mol %) and R-(+)-BINAM (25 mg, 20 mol %) was stirred at 25 °C for 0.5 h. 2-methylbut-2-ene (94 mg, 1.5 mmol) was added followed by the slow addition (4 h) of *N*-(*p*-tolyl)hydroxylamine (55 mg, 0.5 mmol). The product **3f**

was isolated by a column chromatography on silica gel (hexanes/EtOAc = 99:1–98:2; TLC:  $R_f = 0.7$  (5% EtOAc in hexanes)). Yield = 43 mg (55%). Data for **3f**:  $^1\text{H}$  NMR (400 MHz,  $\text{CDCl}_3$ )  $\delta$  6.99 (d,  $J = 8.4$  Hz, 2H), 6.53 (d,  $J = 8.4$  Hz, 2H), 5.01 (s, 1H), 4.87 (s, 1H), 3.89 (q,  $J = 6.8$  Hz, 1H), 3.61 (bs, 1H), 2.26 (s, 3H), 1.74 (s, 3H), 1.34 (d,  $J = 6.8$  Hz, 3H) ppm;  $^{13}\text{C}\{^1\text{H}\}$  NMR (100 MHz,  $\text{CDCl}_3$ )  $\delta$  147.4, 145.2, 129.5, 126.1, 113.3, 110.5, 54.7, 21.2, 20.3, 18.1 ppm; GC-MS for  $\text{C}_{14}\text{H}_{17}\text{N}$ ,  $m/z = 175.13$  ( $\text{M}^+$ ); HRMS (IT-TOF/ESI) Calcd for  $\text{C}_{14}\text{H}_{18}\text{N}$  ( $[\text{M}+\text{H}]^+$ ) 176.1434, Found 176.1431.

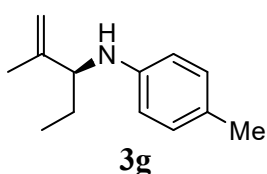

**(S)-4-methyl-N-(2-methylpent-1-en-3-yl)aniline (3g):** A dichloromethane (2.0 mL) solution of  $\text{Cu}(\text{MeCN})_4\text{PF}_6$  (17 mg, 10 mol %) and R-(+)-BINAM (25 mg, 20 mol %) was stirred at 25 °C for 0.5 h. 2-methylpent-2-ene (113 mg, 1.5 mmol) was added followed by the slow addition (4 h) of *N*-(*p*-tolyl)hydroxylamine (55 mg, 0.5 mmol). The product **3g**

was isolated by a column chromatography on silica gel (hexanes/EtOAc = 99:1–98:2; TLC:  $R_f = 0.7$  (5% EtOAc in hexanes)). Yield = 49 mg (58%). Data for **3g**:  $^1\text{H}$  NMR (400 MHz,  $\text{CDCl}_3$ )  $\delta$  6.98 (d,  $J = 8.0$  Hz, 2H), 6.54 (d,  $J = 8.4$  Hz, 2H), 4.98 (s, 1H), 4.93 (s, 1H), 3.66 (t,  $J = 6.8$  Hz, 1H), 3.61 (bs, 1H), 2.25 (s, 3H), 1.68 (s, 3H), 1.63 (q,  $J = 7.4$  Hz, 2H), 0.98 (t,  $J = 7.4$  Hz, 3H) ppm;  $^{13}\text{C}\{^1\text{H}\}$  NMR (100 MHz,  $\text{CDCl}_3$ )  $\delta$  145.5, 145.4, 129.5, 126.0, 113.3, 112.2, 61.2, 27.1, 20.3, 17.6, 10.8 ppm; GC-MS for  $\text{C}_{13}\text{H}_{19}\text{N}$ ,  $m/z = 189.15$  ( $\text{M}^+$ ); HRMS (IT-TOF/ESI) Calcd for  $\text{C}_{13}\text{H}_{20}\text{N}$  ( $[\text{M}+\text{H}]^+$ ) 190.1590, Found 190.1589.

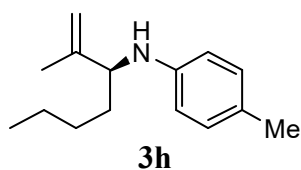

**(S)-4-methyl-N-(2-methylhept-1-en-3-yl)aniline (3h):** A dichloromethane (2.0 mL) solution of  $\text{Cu}(\text{MeCN})_4\text{PF}_6$  (17 mg, 10 mol %) and R-(+)-BINAM (25 mg, 20 mol %) was stirred at 25 °C for 0.5 h. 2-methylhept-2-ene (150 mg, 1.5 mmol) was added followed by the slow addition (4 h) of *N*-(*p*-tolyl)hydroxylamine (55 mg, 0.5 mmol).

The product **3h** was isolated by a column chromatography on silica gel (hexanes/EtOAc = 99:1–98:2; TLC:  $R_f = 0.75$  (5% EtOAc in hexanes)). Yield = 59 mg (62%). Data for **3h**:  $^1\text{H}$  NMR (400 MHz,  $\text{CDCl}_3$ )  $\delta$  6.87 (d,  $J = 8.8$  Hz, 2H), 6.42 (d,  $J = 8.4$  Hz, 2H), 4.86 (s, 1H), 4.80 (s, 1H), 3.61 (t,  $J = 6.8$  Hz, 1H), 3.49 (bs, 1H), 2.13 (s, 3H), 1.56 (s, 3H), 1.48 (p,  $J = 3.4$  Hz, 2H), 1.28–1.25 (m, 4H), 0.82 (t,  $J = 7.0$  Hz, 3H) ppm;  $^{13}\text{C}\{^1\text{H}\}$  NMR (100 MHz,  $\text{CDCl}_3$ )  $\delta$  146.2, 145.7, 129.7, 126.2, 113.5, 112.0, 59.9, 34.3, 28.7, 22.8, 20.5, 17.8, 14.2 ppm; GC-MS for  $\text{C}_{15}\text{H}_{23}\text{N}$ ,  $m/z = 217.18$  ( $\text{M}^+$ ); HRMS (IT-TOF/ESI) Calcd for  $\text{C}_{15}\text{H}_{24}\text{N}$  ( $[\text{M}+\text{H}]^+$ ) 218.1903, Found 218.1905.

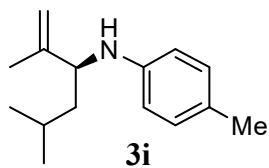

**(S)-N-(2,5-dimethylhex-1-en-3-yl)-4-methylaniline (3i):** A dichloromethane (2.0 mL) solution of  $\text{Cu}(\text{MeCN})_4\text{PF}_6$  (17 mg, 10 mol %) and R-(+)-BINAM (25 mg, 20 mol %) was stirred at 25 °C for 0.5 h. 2,5-dimethylhex-2-ene (150 mg, 1.5 mmol) was added followed by the slow addition (4 h) of *N*-(*p*-tolyl)hydroxylamine (55 mg, 0.5 mmol). The product

**3i** was isolated by a column chromatography on silica gel (hexanes/EtOAc = 99:1–98:2; TLC:  $R_f$  = 0.7 (5% EtOAc in hexanes)). Yield = 63 mg (65%). Data for **3i**:  $^1\text{H}$  NMR (400 MHz,  $\text{CDCl}_3$ )  $\delta$  6.98 (d,  $J$  = 8.4 Hz, 2H), 6.53 (d,  $J$  = 8.4, 2H), 4.99 (s, 1H), 4.90 (s, 1H), 3.81 (t,  $J$  = 7.2 Hz, 1H), 3.56 (bs, 1H), 2.25 (s, 3H), 1.78–1.72 (m, 1H), 1.68 (s, 3H), 1.46 (t,  $J$  = 7.0 Hz, 2H), 0.98 (d,  $J$  = 6.4 Hz, 3H), 0.95 (d,  $J$  = 6.4 Hz, 3H) ppm;  $^{13}\text{C}\{^1\text{H}\}$  NMR (100 MHz,  $\text{CDCl}_3$ )  $\delta$  146.2, 145.4, 129.5, 126.0, 113.3, 111.7, 57.7, 44.0, 24.9, 22.8, 22.5, 20.3, 17.5 ppm; GC-MS for  $\text{C}_{15}\text{H}_{23}\text{N}$ ,  $m/z$  = 217.18 ( $\text{M}^+$ ); HRMS (IT-TOF/ESI) Calcd for  $\text{C}_{15}\text{H}_{24}\text{N}$  ( $[\text{M}+\text{H}]^+$ ) 218.1903, Found 218.1903.

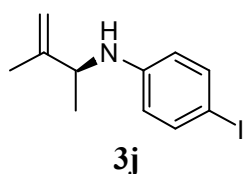

**(S)-4-iodo-N-(3-methylbut-3-en-2-yl)aniline (3j):** A dichloromethane (2.0 mL) solution of  $\text{Cu}(\text{MeCN})_4\text{PF}_6$  (9 mg, 10 mol %) and R-(+)-BINAM (13 mg, 20 mol %) was stirred at 25 °C for 0.5 h. 2-methylbut-2-ene (49 mg, 1.5 mmol) was added followed by the slow addition (4 h) of *N*-(4-iodophenyl)hydroxylamine (55 mg, 0.5 mmol). The product **3j** was

isolated by a column chromatography on silica gel (hexanes/EtOAc = 99:1–98:2; TLC:  $R_f$  = 0.75 (5% EtOAc in hexanes)). Yield = 53mg (76%). Data for **3j**:  $^1\text{H}$  NMR (400 MHz,  $\text{CDCl}_3$ )  $\delta$  7.38 (d,  $J$  = 8.4 Hz, 2H), 6.34 (d,  $J$  = 8.8 Hz, 2H), 4.95 (s, 1H), 4.85 (s, 1H), 3.82 (t,  $J$  = 6.6 Hz, 1H), 3.76 (bs, 1H), 1.69 (s, 3H), 1.32 (d,  $J$  = 6.4 Hz, 3H) ppm;  $^{13}\text{C}\{^1\text{H}\}$  NMR (100 MHz,  $\text{CDCl}_3$ )  $\delta$  147.0, 146.7, 137.6, 115.4, 110.9, 77.6, 54.4, 21.1, 18.0 ppm; GC-MS for  $\text{C}_{11}\text{H}_{14}\text{IN}$ ,  $m/z$  = 287.01 ( $\text{M}^+$ ); HRMS (IT-TOF/ESI) Calcd for  $\text{C}_{11}\text{H}_{15}\text{IN}$  ( $[\text{M}+\text{H}]^+$ ) 288.0244, Found 288.0243.

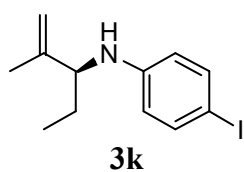

**(S)-4-iodo-N-(2-methylpent-1-en-3-yl)aniline (3k):** A dichloromethane (2.0 mL) solution of  $\text{Cu}(\text{MeCN})_4\text{PF}_6$  (9 mg, 10 mol %) and R-(+)-BINAM (13 mg, 20 mol %) was stirred at 25 °C for 0.5 h. 2-methylpent-2-ene (59 mg, 1.5 mmol) was added followed by the slow addition (4 h) of *N*-(4-iodophenyl)hydroxylamine (55 mg, 0.5 mmol). The product **3k** was

isolated by a column chromatography on silica gel (hexanes/EtOAc = 99:1–98:2; TLC:  $R_f$  = 0.75 (5% EtOAc in hexanes)). Yield = 60 mg (86%). Data for **3k**:  $^1\text{H}$  NMR (400 MHz,  $\text{CDCl}_3$ )  $\delta$  7.37 (d,  $J$  = 8.4 Hz, 2H), 6.36 (d,  $J$  = 8.4 Hz, 2H), 4.93 (s, 1H), 4.92 (s, 1H), 3.75 (bs, 1H), 3.60 (t,  $J$  = 6.6 Hz, 1H), 1.63 (s, 3H), 1.62–1.58 (m, 2H), 0.95 (t,  $J$  = 7.4 Hz, 3H) ppm;  $^{13}\text{C}\{^1\text{H}\}$  NMR (100 MHz,  $\text{CDCl}_3$ )  $\delta$  147.2, 144.7, 137.5, 115.4, 112.6, 77.4, 60.9, 27.0, 17.6, 10.7 ppm; GC-MS for  $\text{C}_{12}\text{H}_{16}\text{IN}$ ,  $m/z$  = 301.03 ( $\text{M}^+$ ); HRMS (IT-TOF/ESI) Calcd for  $\text{C}_{12}\text{H}_{17}\text{IN}$  ( $[\text{M}+\text{H}]^+$ ) 302.0400, Found 302.0398.



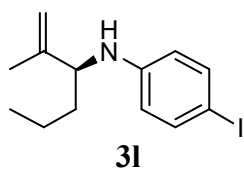

**(S)-4-iodo-N-(2-methylhex-1-en-3-yl)aniline (31):** A dichloromethane (2.0 mL) solution of  $\text{Cu}(\text{MeCN})_4\text{PF}_6$  (9 mg, 10 mol %) and R-(+)-BINAM (13 mg, 20 mol %) was stirred at 25 °C for 0.5 h. 2-methylhex-2-ene (69 mg, 1.5 mmol) was added followed by the slow addition (4 h) of *N*-(4-iodophenyl)hydroxylamine (55 mg, 0.5 mmol). The product **31** was isolated by a column chromatography on silica gel (hexanes/EtOAc = 99:1–98:2; TLC:  $R_f$  = 0.75 (5% EtOAc in hexanes)). Yield = 58 mg (78%). Data for **31**:  $^1\text{H}$  NMR (400 MHz,  $\text{CDCl}_3$ )  $\delta$  7.37 (d,  $J$  = 8.8 Hz, 2H), 6.36 (d,  $J$  = 8.8 Hz, 2H), 4.93 (s, 1H), 4.89 (s, 1H), 3.74 (bs, 1H), 3.69 (t,  $J$  = 6.8 Hz, 1H), 1.63 (s, 3H), 1.60–1.52 (m, 2H), 1.44–1.33 (m, 2H), 0.94 (t,  $J$  = 7.4 Hz, 3H) ppm;  $^{13}\text{C}\{^1\text{H}\}$  NMR (100 MHz,  $\text{CDCl}_3$ )  $\delta$  147.2, 145.2, 137.6, 115.4, 112.3, 77.4, 59.1, 36.5, 19.4, 17.6, 13.9 ppm; GC-MS for  $\text{C}_{13}\text{H}_{18}\text{IN}$ ,  $m/z$  = 315.04 ( $\text{M}^+$ ); HRMS (IT-TOF/ESI) Calcd for  $\text{C}_{13}\text{H}_{19}\text{IN}$  ( $[\text{M}+\text{H}]^+$ ) 316.0557, Found 316.0555.

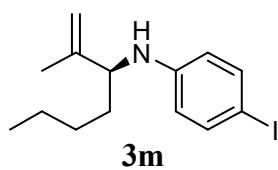

**(S)-4-iodo-N-(2-methylhept-1-en-3-yl)aniline (3m):** A dichloromethane (2.0 mL) solution of  $\text{Cu}(\text{MeCN})_4\text{PF}_6$  (9 mg, 10 mol %) and R-(+)-BINAM (13 mg, 20 mol %) was stirred at 25 °C for 0.5 h. 2-methylhept-2-ene (79 mg, 1.5 mmol) was added followed by the slow addition (4 h) of *N*-(4-iodophenyl)hydroxylamine (55 mg, 0.5 mmol). The product **3m** was isolated by a column chromatography on silica gel (hexanes/EtOAc = 99:1–98:2; TLC:  $R_f$  = 0.75 (5% EtOAc in hexanes)). Yield = 62 mg (81%). Data for **3m**:  $^1\text{H}$  NMR (400 MHz,  $\text{CDCl}_3$ )  $\delta$  7.37 (d,  $J$  = 8.8 Hz, 2H), 6.35 (d,  $J$  = 8.8 Hz, 2H), 4.93 (s, 1H), 4.90 (s, 1H), 3.74 (bs, 1H), 3.67 (t,  $J$  = 6.8 Hz, 1H), 1.63 (s, 3H), 1.60–1.54 (m, 2H), 1.35–1.33 (m, 4H), 0.91 (t,  $J$  = 6.8 Hz, 3H) ppm;  $^{13}\text{C}\{^1\text{H}\}$  NMR (100 MHz,  $\text{CDCl}_3$ )  $\delta$  147.2, 145.2, 137.5, 115.4, 112.3, 77.4, 59.3, 34.0, 28.4, 22.5, 17.6, 14.0 ppm; GC-MS for  $\text{C}_{14}\text{H}_{20}\text{IN}$ ,  $m/z$  = 329.06 ( $\text{M}^+$ ); HRMS (IT-TOF/ESI) Calcd for  $\text{C}_{14}\text{H}_{21}\text{IN}$  ( $[\text{M}+\text{H}]^+$ ) 330.0713, Found 330.0710.

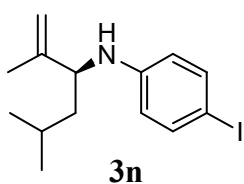

**(S)-N-(2,5-dimethylhex-1-en-3-yl)-4-iodoaniline (3n):** A dichloromethane (2.0 mL) solution of  $\text{Cu}(\text{MeCN})_4\text{PF}_6$  (9 mg, 10 mol %) and R-(+)-BINAM (13 mg, 20 mol %) was stirred at 25 °C for 0.5 h. 2,5-dimethylhex-2-ene (79 mg, 1.5 mmol) was added followed by the slow addition (4 h) of *N*-(4-iodophenyl)hydroxylamine (55 mg, 0.5 mmol). The product **3n** was isolated by a column chromatography on silica gel (hexanes/EtOAc = 99:1–98:2; TLC:  $R_f$  = 0.75 (5% EtOAc in hexanes)). Yield = 56 mg (73%). Data for **3n**:  $^1\text{H}$  NMR (400 MHz,  $\text{CDCl}_3$ )  $\delta$  7.37 (d,  $J$  = 8.8 Hz, 2H), 6.36 (d,  $J$  = 8.8 Hz, 2H), 4.94 (s, 1H), 4.88 (s, 1H), 3.75 (t,  $J$  = 7.2 Hz, 1H), 3.71 (bs, 1H), 1.74–1.67 (m, 1H), 1.63 (s, 3H), 1.46–1.41 (m, 2H), 0.94 (d,  $J$  = 6.4 Hz, 3H), 0.92 (d,  $J$  = 6.4 Hz, 3H) ppm;  $^{13}\text{C}\{^1\text{H}\}$  NMR (100 MHz,  $\text{CDCl}_3$ )  $\delta$  147.2, 145.5, 137.6, 115.4, 112.1, 77.4, 57.4, 43.8, 24.8, 22.8, 22.4, 17.5 ppm; GC-MS for  $\text{C}_{14}\text{H}_{20}\text{IN}$ ,  $m/z$  = 329.06 ( $\text{M}^+$ ); HRMS (IT-TOF/ESI) Calcd for  $\text{C}_{14}\text{H}_{21}\text{IN}$  ( $[\text{M}+\text{H}]^+$ ) 330.0713, Found 330.0710.

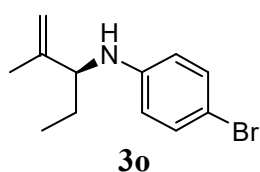

**(S)-4-bromo-N-(2-methylpent-1-en-3-yl)aniline (3o):** A dichloromethane (2.0 mL) solution of  $\text{Cu}(\text{MeCN})_4\text{PF}_6$  (11 mg, 10 mol %) and R-(+)-BINAM (17 mg, 20 mol %) was stirred at 25 °C for 0.5 h. 2-methylpent-2-ene (74 mg, 1.5 mmol) was added followed by the slow addition (4 h) of *N*-(4-bromophenyl)hydroxylamine (55 mg, 0.5 mmol). The

product **3o** was isolated by a column chromatography on silica gel (hexanes/EtOAc = 99:1–98:2; TLC:  $R_f$  = 0.75 (5% EtOAc in hexanes)). Yield = 58 mg (79%). Data for **3o**:  $^1\text{H}$  NMR (400 MHz,  $\text{CDCl}_3$ )  $\delta$  7.21 (d,  $J$  = 8.4 Hz, 2H), 6.46 (d,  $J$  = 8.4 Hz, 2H), 4.94 (s, 1H), 4.93 (s, 1H), 3.74 (bs, 1H), 3.60 (t,  $J$  = 6.6 Hz, 1H), 1.64 (s, 3H), 1.62–1.58 (m, 2H), 0.95 (t,  $J$  = 7.4 Hz, 3H) ppm;  $^{13}\text{C}\{^1\text{H}\}$  NMR (100 MHz,  $\text{CDCl}_3$ )  $\delta$  146.7, 144.8, 131.7, 114.8, 112.6, 108.5, 61.0, 27.0, 17.6, 10.7 ppm; GC-MS for  $\text{C}_{12}\text{H}_{16}\text{BrN}$ ,  $m/z$  = 253.04 ( $\text{M}^+$ ); HRMS (IT-TOF/ESI) Calcd for  $\text{C}_{12}\text{H}_{17}\text{BrN}$  ( $[\text{M}+\text{H}]^+$ ) 254.0539, Found 254.0537.

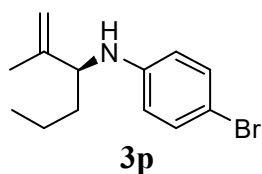

**(S)-4-bromo-N-(2-methylhex-1-en-3-yl)aniline (3p):** A dichloromethane (2.0 mL) solution of  $\text{Cu}(\text{MeCN})_4\text{PF}_6$  (11 mg, 10 mol %) and R-(+)-BINAM (17 mg, 20 mol %) was stirred at 25 °C for 0.5 h. 2-methylhex-2-ene (86 mg, 1.5 mmol) was added followed by the slow addition (4 h) of *N*-(4-bromophenyl)hydroxylamine (55 mg, 0.5 mmol). The

product **3p** was isolated by a column chromatography on silica gel (hexanes/EtOAc = 99:1–98:2; TLC:  $R_f$  = 0.75 (5% EtOAc in hexanes)). Yield = 55 mg (71%). Data for **3p**:  $^1\text{H}$  NMR (400 MHz,  $\text{CDCl}_3$ )  $\delta$  7.20 (d,  $J$  = 8.8 Hz, 2H), 6.45 (d,  $J$  = 8.4 Hz, 2H), 4.94 (s, 1H), 4.90 (s, 1H), 3.72 (bs, 1H), 3.69 (t,  $J$  = 6.8 Hz, 1H), 1.64 (s, 3H), 1.60–1.52 (m, 2H), 1.45–1.32 (m, 2H), 0.94 (t,  $J$  = 7.2 Hz, 3H) ppm;  $^{13}\text{C}\{^1\text{H}\}$  NMR (100 MHz,  $\text{CDCl}_3$ )  $\delta$  146.7, 145.3, 131.7, 114.7, 112.3, 108.4, 59.3, 36.5, 19.4, 17.5, 13.9 ppm; GC-MS for  $\text{C}_{13}\text{H}_{18}\text{BrN}$ ,  $m/z$  = 267.06 ( $\text{M}^+$ ); HRMS (IT-TOF/ESI) Calcd for  $\text{C}_{13}\text{H}_{19}\text{BrN}$  ( $[\text{M}+\text{H}]^+$ ) 268.0695, Found 268.0693.

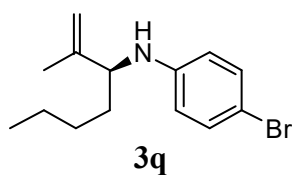

**(S)-4-bromo-N-(2-methylhept-1-en-3-yl)aniline (3q):** A dichloromethane (2.0 mL) solution of  $\text{Cu}(\text{MeCN})_4\text{PF}_6$  (11 mg, 10 mol %) and R-(+)-BINAM (17 mg, 20 mol %) was stirred at 25 °C for 0.5 h. 2-methylhept-2-ene (98 mg, 1.5 mmol) was added followed by the slow addition (4 h) of *N*-(4-bromophenyl)hydroxylamine (55 mg, 0.5 mmol). The

product **3q** was isolated by a column chromatography on silica gel (hexanes/EtOAc = 99:1–98:2; TLC:  $R_f$  = 0.75 (5% EtOAc in hexanes)). Yield = 56 mg (68%). Data for **3q**:  $^1\text{H}$  NMR (400 MHz,  $\text{CDCl}_3$ )  $\delta$  7.20 (d,  $J$  = 8.4 Hz, 2H), 6.45 (d,  $J$  = 8.8 Hz, 2H), 4.94 (s, 1H), 4.90 (s, 1H), 3.73 (bs, 1H), 3.67 (t,  $J$  = 6.8 Hz, 1H), 1.64 (s, 3H), 1.60–1.54 (m, 2H), 1.36–1.34 (m, 4H), 0.92 (t,  $J$  = 6.6 Hz, 3H) ppm;  $^{13}\text{C}\{^1\text{H}\}$  NMR (100 MHz,  $\text{CDCl}_3$ )  $\delta$  146.6, 145.2, 131.7, 114.7, 112.4, 108.4, 59.5, 34.0, 28.4, 22.5, 17.6, 14.0 ppm; GC-MS for  $\text{C}_{14}\text{H}_{20}\text{BrN}$ ,  $m/z$  = 281.07 ( $\text{M}^+$ ); HRMS (IT-TOF/ESI) Calcd for  $\text{C}_{14}\text{H}_{21}\text{BrN}$  ( $[\text{M}+\text{H}]^+$ ) 282.0852, Found 282.0848.

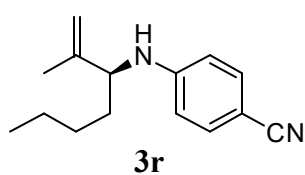

**(S)-4-((2-methylhept-1-en-3-yl)amino)benzonitrile (3r):** A dichloromethane (2.0 mL) solution of  $\text{Cu}(\text{MeCN})_4\text{PF}_6$  (11 mg, 10 mol %) and R-(+)-BINAM (17 mg, 20 mol %) was stirred at 25 °C for 0.5 h. 2-methylhept-2-ene (137 mg, 1.5 mmol) was added followed by the slow addition (4 h) of *N*-(4-cyanophenyl)hydroxylamine (55 mg,

0.5 mmol). The product **3r** was isolated by a column chromatography on silica gel (hexanes/EtOAc = 99:1–98:2; TLC:  $R_f$  = 0.75 (5% EtOAc in hexanes)). Yield = 33 mg (35%). Data for **3r**:  $^1\text{H}$  NMR (400 MHz,  $\text{CDCl}_3$ )  $\delta$  7.37 (d,  $J$  = 8.4 Hz, 2H), 6.53 (d,  $J$  = 8.8 Hz, 2H), 4.94 (s, 1H), 4.92 (s, 1H), 4.33 (bs, 1H), 3.74 (q,  $J$  = 6.8 Hz, 1H), 1.65 (s, 3H), 1.62–1.55 (m, 2H), 1.39–1.33 (m, 4H), 0.91 (t,  $J$  = 6.8 Hz, 3H) ppm;  $^{13}\text{C}\{^1\text{H}\}$  NMR (100 MHz,

CDCl<sub>3</sub>)  $\delta$  150.8, 144.4, 133.4, 120.6, 112.7, 98.1, 59.0, 33.7, 28.2, 22.4, 17.6, 13.9 ppm; GC-MS for C<sub>15</sub>H<sub>20</sub>N<sub>2</sub>,  $m/z$  = 228.16 (M<sup>+</sup>); HRMS (IT-TOF/ESI) Calcd for C<sub>15</sub>H<sub>21</sub>N<sub>2</sub> ([M+H]<sup>+</sup>) 229.1699, Found 229.1700.

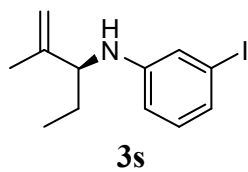

**(S)-3-iodo-N-(2-methylpent-1-en-3-yl)aniline (3s):** A dichloromethane (2.0 mL) solution of Cu(MeCN)<sub>4</sub>PF<sub>6</sub> (9 mg, 10 mol %) and R-(+)-BINAM (13 mg, 20 mol %) was stirred at 25 °C for 0.5 h. 2-methylpent-2-ene (59 mg, 1.5 mmol) was added followed by the slow addition (4 h) of *N*-(3-iodophenyl)hydroxylamine (55 mg, 0.5 mmol). The product **3s** was isolated by a column chromatography on silica gel (hexanes/EtOAc = 99:1–98:2; TLC: R<sub>f</sub> = 0.75 (5% EtOAc in hexanes)). Yield = 57 mg (82%). Data for **3s**: <sup>1</sup>H NMR (400 MHz, CDCl<sub>3</sub>)  $\delta$  6.97 (d,  $J$  = 7.6 Hz, 1H), 6.93 (s, 1H), 6.84 (t,  $J$  = 8.0, 1H), 6.52 (d,  $J$  = 8.0 Hz, 1H), 4.96 (s, 1H), 4.94 (s, 1H), 3.73 (bs, 1H), 3.61 (t,  $J$  = 6.3 Hz 1H), 1.65 (s, 3H), 1.62–1.57 (m, 2H), 0.95 (t,  $J$  = 7.6 Hz, 3H) ppm; <sup>13</sup>C{<sup>1</sup>H} NMR (100 MHz, CDCl<sub>3</sub>)  $\delta$  148.9, 144.7, 130.5, 125.7, 121.8, 112.6, 112.3, 95.1, 60.8, 27.0, 17.6, 10.7 ppm; GC-MS for C<sub>12</sub>H<sub>16</sub>IN,  $m/z$  = 301.03 (M<sup>+</sup>); HRMS (IT-TOF/ESI) Calcd for C<sub>12</sub>H<sub>17</sub>IN ([M+H]<sup>+</sup>) 302.0400, Found 302.0401.

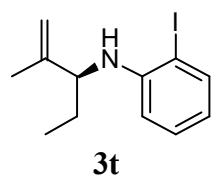

**(S)-2-iodo-N-(2-methylpent-1-en-3-yl)aniline (3t):** A dichloromethane (2.0 mL) solution of Cu(MeCN)<sub>4</sub>PF<sub>6</sub> (9 mg, 10 mol %) and R-(+)-BINAM (13 mg, 20 mol %) was stirred at 25 °C for 0.5 h. 2-methylpent-2-ene (59 mg, 1.5 mmol) was added followed by the slow addition (4 h) of *N*-(2-iodophenyl)hydroxylamine (55 mg, 0.5 mmol). The product **3t** was isolated by a column chromatography on silica gel (hexanes/EtOAc = 99:1–98:2; TLC: R<sub>f</sub> = 0.75 (5% EtOAc in hexanes)). Yield = 48 mg (68%). Data for **3t**: <sup>1</sup>H NMR (400 MHz, CDCl<sub>3</sub>)  $\delta$  7.67 (d,  $J$  = 8.0 Hz, 1H), 7.18 (t,  $J$  = 7.6, 1H), 6.55 (d,  $J$  = 8.4 Hz, 1H), 6.44 (t,  $J$  = 7.6, 1H), 4.99 (s, 1H), 4.96 (s, 1H), 4.31 (bs, 1H), 3.73 (q,  $J$  = 6.6 Hz 1H), 1.78–1.72 (m, 2H), 1.70 (s, 3H), 1.04 (t,  $J$  = 7.4 Hz, 3H) ppm; <sup>13</sup>C{<sup>1</sup>H} NMR (100 MHz, CDCl<sub>3</sub>)  $\delta$  146.5, 144.7, 138.8, 129.1, 118.3, 112.5, 111.7, 85.5, 61.4, 27.1, 17.7, 10.8 ppm; GC-MS for C<sub>12</sub>H<sub>16</sub>IN,  $m/z$  = 301.03 (M<sup>+</sup>); HRMS (IT-TOF/ESI) Calcd for C<sub>12</sub>H<sub>17</sub>IN ([M+H]<sup>+</sup>) 302.0400, Found 302.0399.

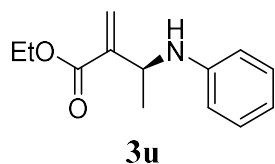

**(S)-ethyl 2-methylene-3-(phenylamino)butanoate (3u):** A dichloromethane (2.0 mL) solution of Cu(MeCN)<sub>4</sub>PF<sub>6</sub> (19 mg, 10 mol %) and R-(+)-BINAM (28 mg, 20 mol %) was stirred at 25 °C for 0.5 h. Ethyl tiglate (194 mg, 1.5 mmol) was added followed by the slow addition (4 h) of phenylhydroxylamine (55 mg, 0.5 mmol). The product **3u** was isolated by a column chromatography on silica gel (hexanes/EtOAc = 98:2–96:6; TLC: R<sub>f</sub> = 0.45 (5% EtOAc in hexanes)). Yield = 60 mg (54%). GC-MS for C<sub>13</sub>H<sub>17</sub>NO<sub>2</sub>,  $m/z$  = 219.16 (M<sup>+</sup>). For <sup>1</sup>H NMR and <sup>13</sup>C{<sup>1</sup>H} NMR please check the reference 8.

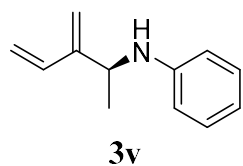

**(S)-N-(3-methylenepent-4-en-2-yl)aniline (3v):** A dichloromethane (2.0 mL) solution of Cu(MeCN)<sub>4</sub>PF<sub>6</sub> (19 mg, 10 mol %) and R-(+)-BINAM (28 mg, 20 mol %) was stirred at 25 °C for 0.5 h. (*E*)-3-methylpenta-1,3-diene (124 mg, 1.5 mmol) was added followed by the slow addition (4 h) of phenylhydroxylamine (55 mg, 0.5 mmol). The product **3v** was isolated by a column chromatography on silica gel (hexanes/EtOAc = 99:1–98:2; TLC: R<sub>f</sub> = 0.7 (5% EtOAc in hexanes)).

Yield = 42 mg (48%). GC-MS for C<sub>12</sub>H<sub>15</sub>N, *m/z* = 173.12 (M<sup>+</sup>). For <sup>1</sup>H NMR and <sup>13</sup>C{<sup>1</sup>H} NMR please check the reference 9.

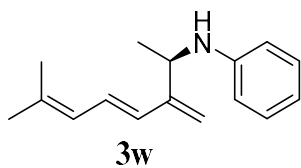

***N*-((*S,4Z,6E*)-2,6-dimethylocta-1,4,6-trien-3-yl)aniline (**3w**):** A dichloromethane (2.0 mL) solution of Cu(MeCN)<sub>4</sub>PF<sub>6</sub> (19 mg, 10 mol %) and R-(+)-BINAM (28 mg, 20 mol %) was stirred at 25 °C for 0.5 h. 2,6-dimethylocta-2,4,6-triene (206 mg, 1.5 mmol) was added followed by the slow addition (4 h) of phenylhydroxylamine (55 mg, 0.5 mmol). The product **5c** was isolated by a column chromatography on silica gel (hexanes/EtOAc = 99:1–98:2; TLC: R<sub>f</sub> = 0.65 (5% EtOAc in hexanes)). Yield = 67 mg (58%). GC-MS for C<sub>16</sub>H<sub>21</sub>N, *m/z* = 227.16 (M<sup>+</sup>). For <sup>1</sup>H NMR and <sup>13</sup>C{<sup>1</sup>H} NMR please check the reference 9.

## 8. References

1. Ghorpade, S.; Liu, R.-S. *Angew. Chem. Int. Ed.* **2014**, *53*, 12885–12888.
2. Alamsetti, S. K.; Mannam, S.; Mutupandi, P.; Sekar, G. *Chem.-Eur. J.* **2009**, *15*, 1086-1090.
3. Felpin, F.-X.; Fouquet, E. *Chem. Eur. J.*, **2010**, 12440-12445.
4. M. C. Harris, Geis, O., and Buchwald, S. L. *J. Org. Chem.*, **1999**, *64*(16), 6019-6022.
5. Yun, S. Y.; Yi, C. S. *Org. Lett.* **2005**, *7*, 2181–2183.
6. Srivastava, R. S.; Bertrand III, R.; Gallo, A. A.; Nicholas, K. M. *Tetrahedron Lett.* **2011**, *52*, 3478–3480.
7. Srivastava, R. S.; Nicholas, K. M. *Tetrahedron Lett.* **1994**, *35*, 8739–8742.
8. Murru, S.; Gallo, A. A.; Srivastava, R. S. *J. Org. Chem.* **2012**, *77*, 7119–7123.
9. Murru, S.; Srivastava, R. S. *E. J. Org. Chem.* **2014**, *10*, 2174–2181.

## 9. HPLC chromatograms of the racemic and chiral *N*-aryl allylamines

### Racemic: *N*-(2-methylbut-1-en-3-yl)aniline (**3a**)

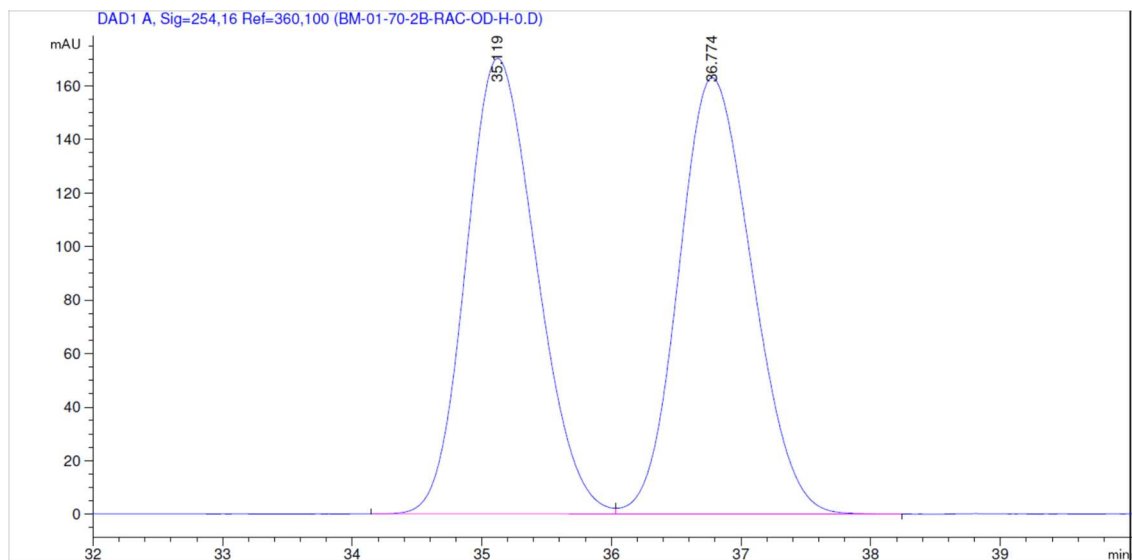

| Peak #   | RetTime [min] | Type | Width [min] | Area [mAU*s] | Height [mAU] | Area %  |
|----------|---------------|------|-------------|--------------|--------------|---------|
| 1        | 35.119        | BV   | 0.5867      | 6401.06689   | 170.21545    | 49.9772 |
| 2        | 36.774        | VB   | 0.6184      | 6406.90771   | 163.05145    | 50.0228 |
| Totals : |               |      |             | 1.28080e4    | 333.26691    |         |

### Chiral: *N*-(2-methylbut-1-en-3-yl)aniline (**3a**) (53% *ee*)

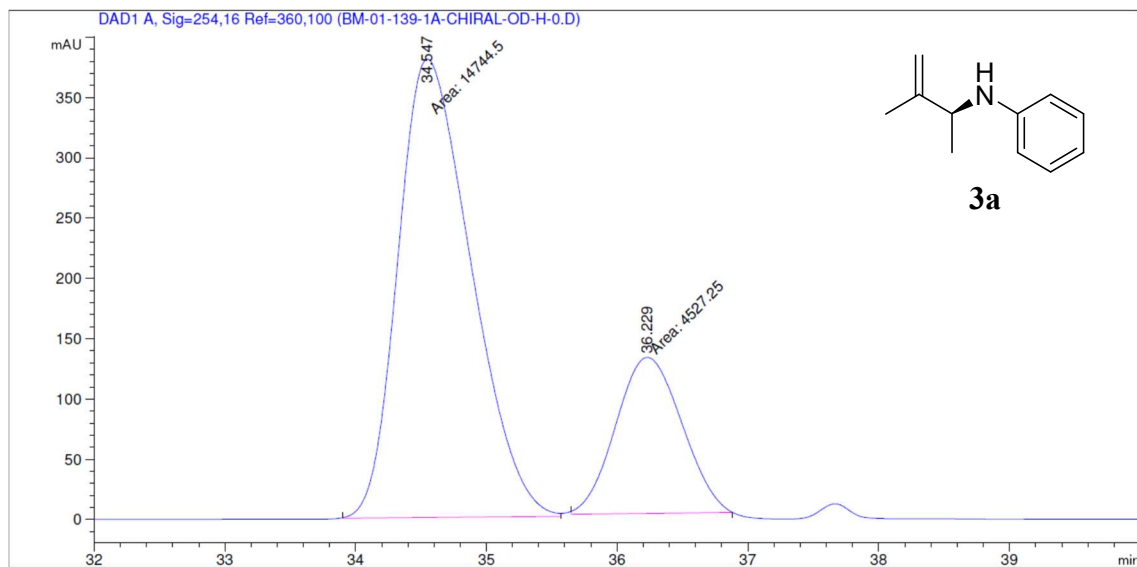

Signal 1: DAD1 A, Sig=254,16 Ref=360,100

| Peak #   | RetTime [min] | Type | Width [min] | Area [mAU*s] | Height [mAU] | Area %  |
|----------|---------------|------|-------------|--------------|--------------|---------|
| 1        | 34.547        | MM   | 0.6463      | 1.47445e4    | 380.24365    | 76.5083 |
| 2        | 36.229        | MP   | 0.5832      | 4527.24854   | 129.37712    | 23.4917 |
| Totals : |               |      |             | 1.92717e4    | 509.62077    |         |

## Racemic: *N*-(2-methylpent-1-en-3-yl)aniline (**3b**)

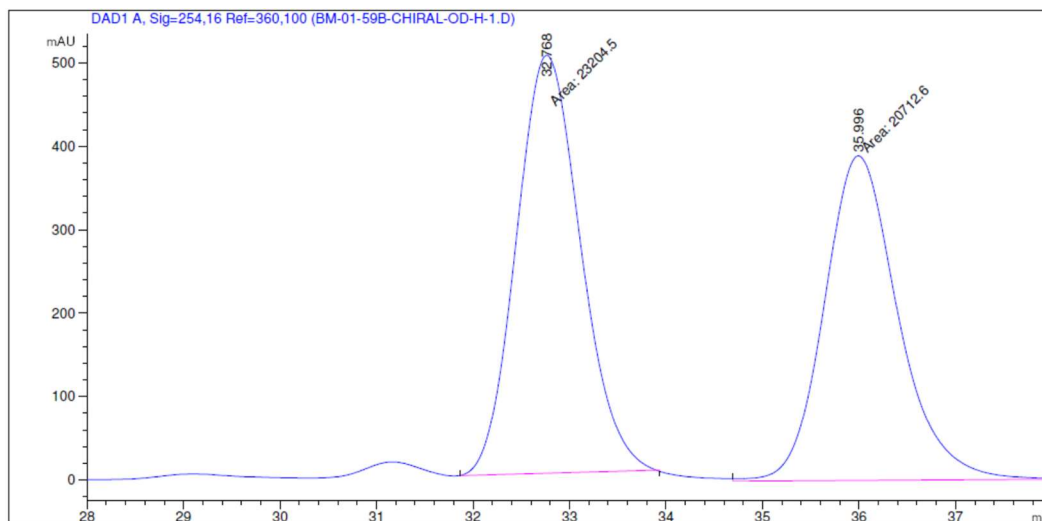

| Peak #   | RetTime [min] | Type | Width [min] | Area [mAU*s] | Height [mAU] | Area %  |
|----------|---------------|------|-------------|--------------|--------------|---------|
| 1        | 32.768        | MM   | 0.7716      | 2.32045e4    | 501.19479    | 52.8371 |
| 2        | 35.996        | MM   | 0.8866      | 2.07126e4    | 389.35547    | 47.1629 |
| Totals : |               |      |             | 4.39171e4    | 890.55026    |         |

## Chiral: (*S*)-*N*-(2-methylpent-1-en-3-yl)aniline (**3b**) (69% *ee*)

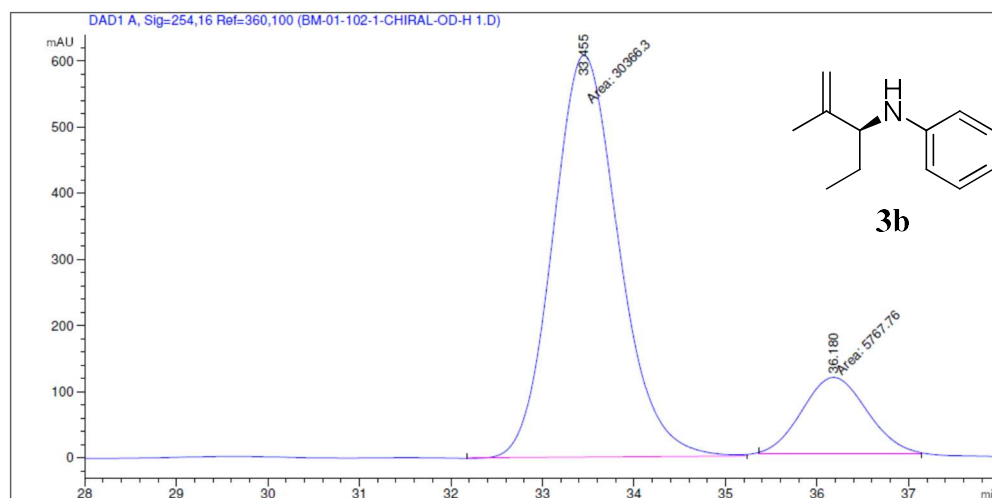

Signal 1: DAD1 A, Sig=254,16 Ref=360,100

| Peak #   | RetTime [min] | Type | Width [min] | Area [mAU*s] | Height [mAU] | Area %  |
|----------|---------------|------|-------------|--------------|--------------|---------|
| 1        | 33.455        | PP   | 0.8282      | 3.01115e4    | 605.94995    | 84.2692 |
| 2        | 36.181        | MM   | 0.8176      | 5621.00049   | 114.57680    | 15.7308 |
| Totals : |               |      |             | 3.57325e4    | 720.52675    |         |

**Racemic: *N*-(2-methylhex-1-en-3-yl)aniline (3c)**

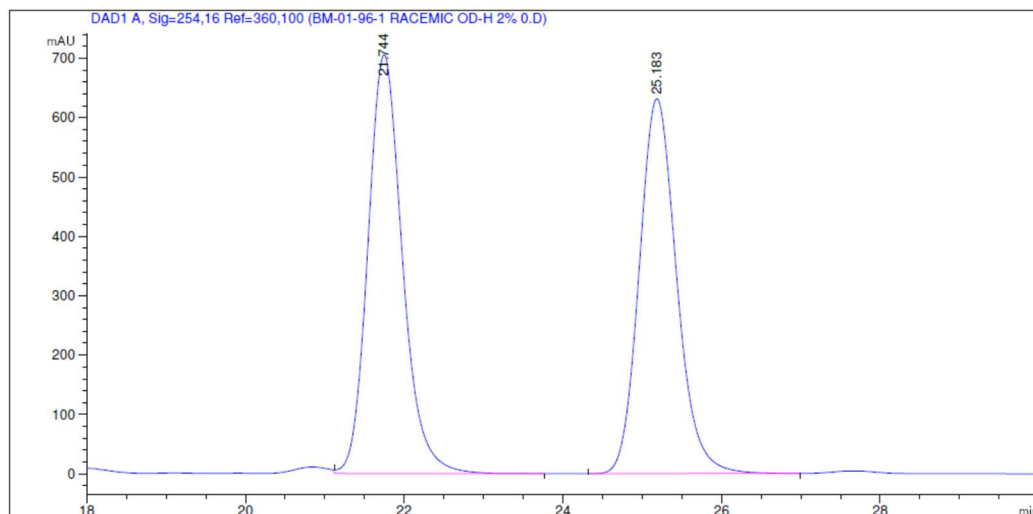

| Peak #   | RetTime [min] | Type | Width [min] | Area [mAU*s] | Height [mAU] | Area %  |
|----------|---------------|------|-------------|--------------|--------------|---------|
| 1        | 21.744        | VB   | 0.4643      | 2.12969e4    | 705.29095    | 50.7663 |
| 2        | 25.183        | BB   | 0.5056      | 2.06540e4    | 631.52881    | 49.2337 |
| Totals : |               |      |             | 4.19509e4    | 1336.81976   |         |

**Chiral: (*S*)-*N*-(2-methylhex-1-en-3-yl)aniline (3c) (63% ee)**

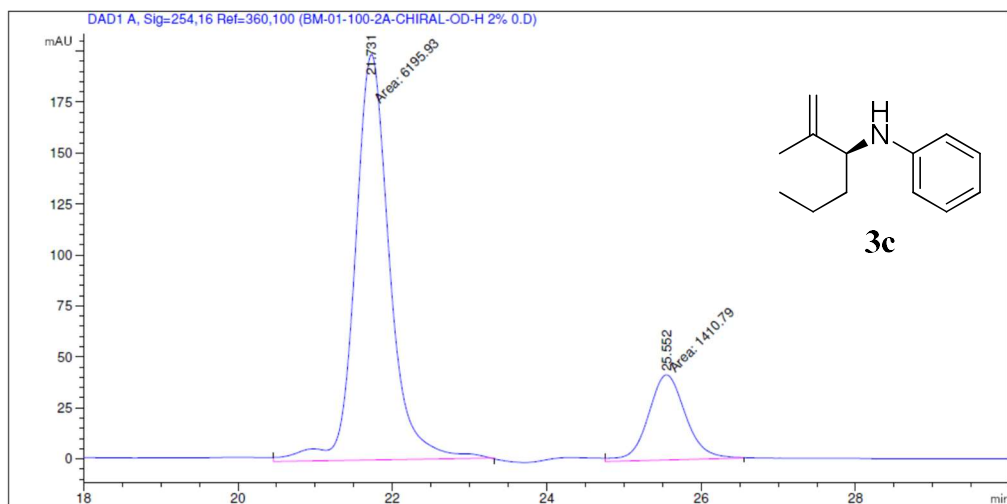

Signal 1: DAD1 A, Sig=254,16 Ref=360,100

| Peak #   | RetTime [min] | Type | Width [min] | Area [mAU*s] | Height [mAU] | Area %  |
|----------|---------------|------|-------------|--------------|--------------|---------|
| 1        | 21.731        | MM   | 0.5193      | 6195.93115   | 198.85376    | 81.4534 |
| 2        | 25.552        | MM   | 0.5633      | 1410.78638   | 41.74030     | 18.5466 |
| Totals : |               |      |             | 7606.71753   | 240.59406    |         |

**Racemic: *N*-(2-methylhept-1-en-3-yl)aniline (3d):**

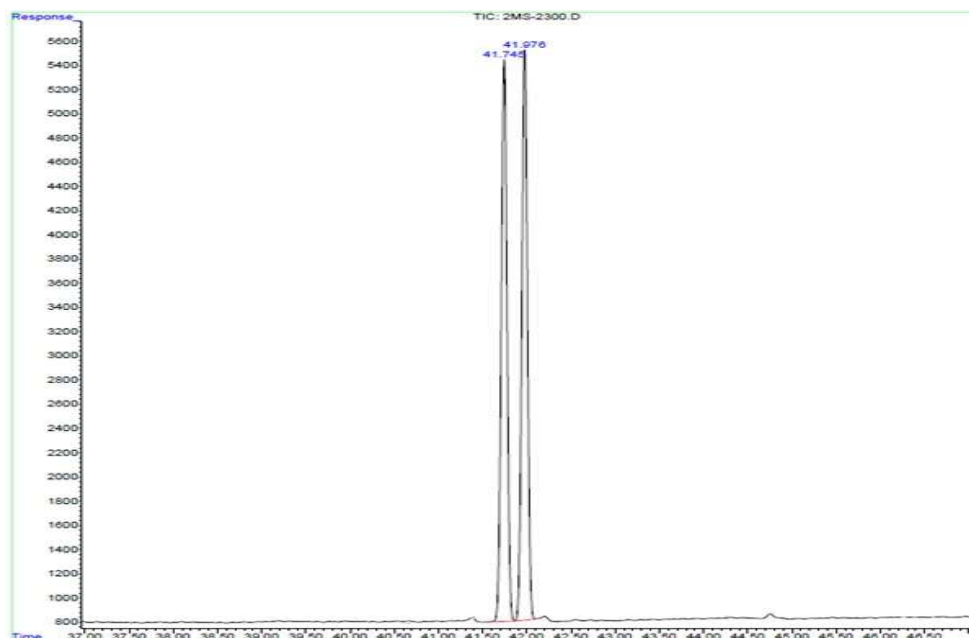

| R.T.<br>min | Start<br>min | End<br>min | peak<br>height | peak<br>area |
|-------------|--------------|------------|----------------|--------------|
| 41.745      | 41.579       | 41.863     | 4646           | 208838       |
| 41.976      | 41.863       | 42.091     | 4705           | 207263       |

**Chiral: (*S*)-*N*-(2-methylhept-1-en-3-yl)aniline (3d): (61% *ee*)**

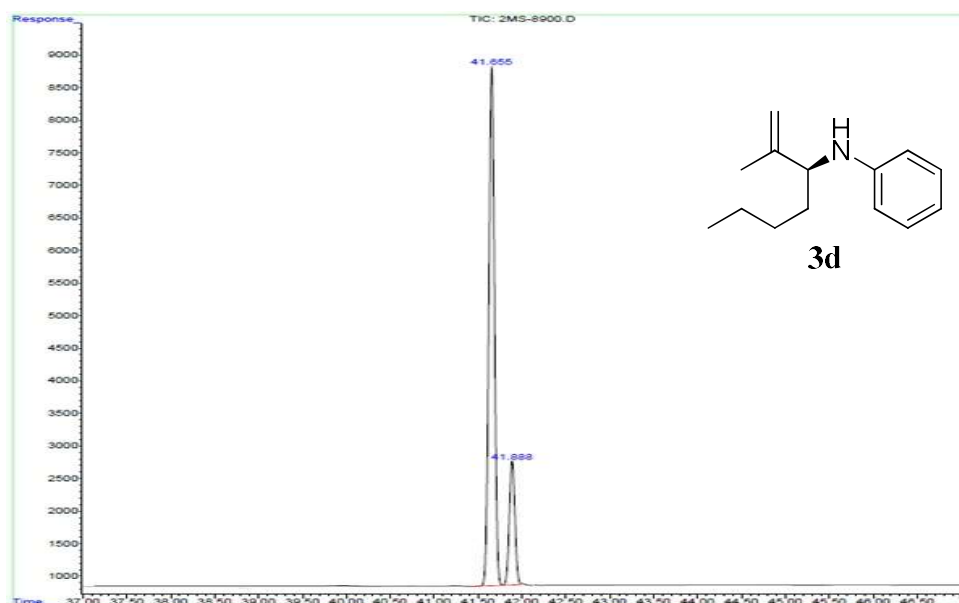

| R.T.<br>min | Start<br>min | End<br>min | peak<br>height | peak<br>area |
|-------------|--------------|------------|----------------|--------------|
| 41.655      | 41.440       | 41.779     | 7940           | 355289       |
| 41.888      | 41.779       | 42.019     | 1903           | 84839        |



**Racemic: *N*-(2,5-dimethylhex-1-en-3-yl)aniline (**3e**)**

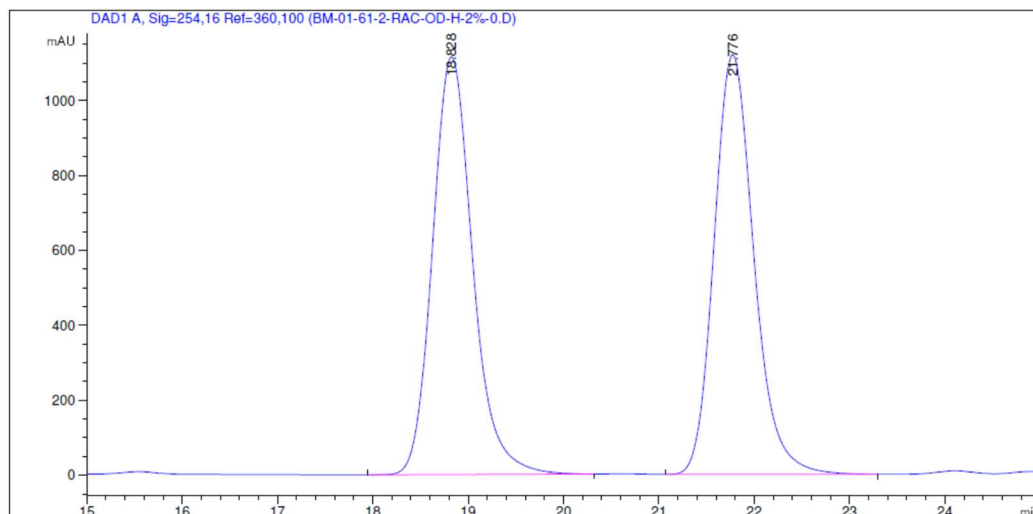

| Peak #   | RetTime [min] | Type | Width [min] | Area [mAU*s] | Height [mAU] | Area %  |
|----------|---------------|------|-------------|--------------|--------------|---------|
| 1        | 18.828        | BB   | 0.4511      | 3.25697e4    | 1114.03784   | 50.0332 |
| 2        | 21.776        | BB   | 0.4511      | 3.25265e4    | 1118.96033   | 49.9668 |
| Totals : |               |      |             | 6.50962e4    | 2232.99817   |         |

**Chiral: (*S*)-*N*-(2,5-dimethylhex-1-en-3-yl)aniline (**3e**) (67% *ee*)**

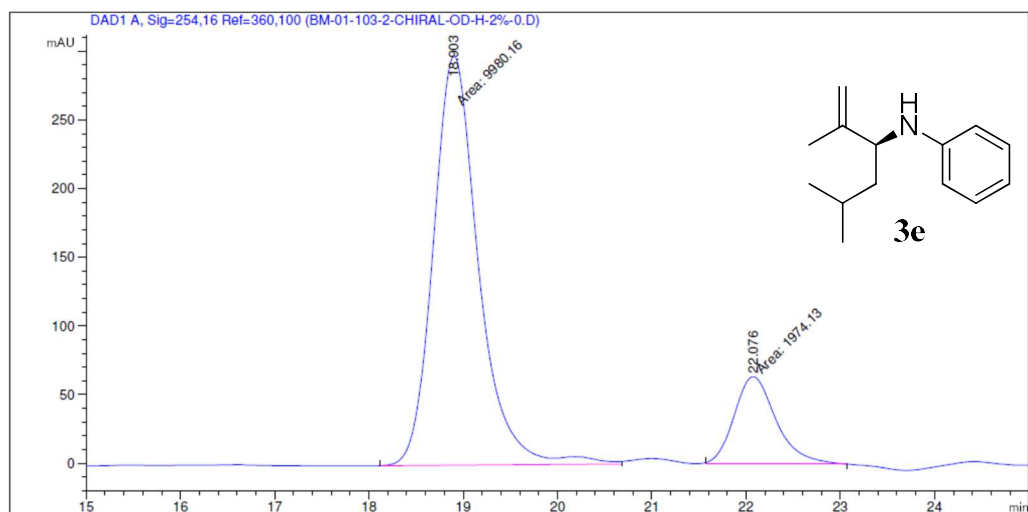

Signal 1: DAD1 A, Sig=254,16 Ref=360,100

| Peak #   | RetTime [min] | Type | Width [min] | Area [mAU*s] | Height [mAU] | Area %  |
|----------|---------------|------|-------------|--------------|--------------|---------|
| 1        | 18.903        | PM   | 0.5581      | 9980.16113   | 298.02954    | 83.4860 |
| 2        | 22.076        | MP   | 0.5166      | 1974.12744   | 63.69362     | 16.5140 |
| Totals : |               |      |             | 1.19543e4    | 361.72316    |         |

### Racemic: 4-methyl-N-(2-methylbut-1-en-3-yl)aniline (3f)

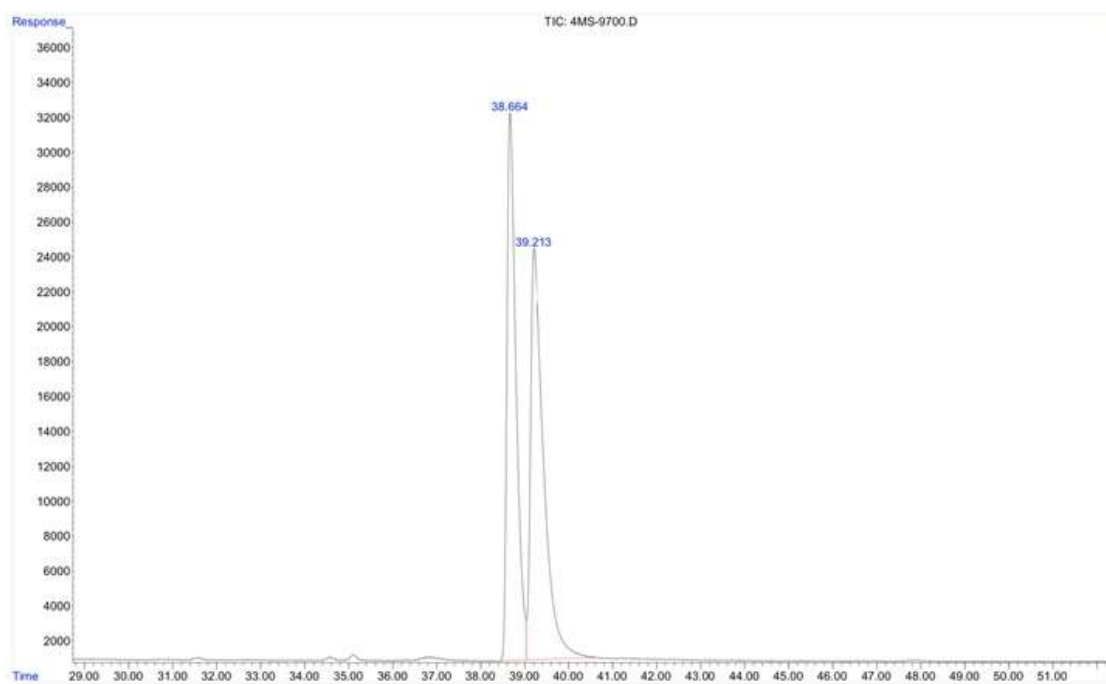

| Ret Time | Type | Width | Area    | Start Time | End Time |
|----------|------|-------|---------|------------|----------|
| 38.664   | BV   | 0.210 | 4484345 | 38.356     | 39.031   |
| 39.213   | VB   | 0.290 | 4938940 | 39.031     | 40.632   |

### Chiral: 4-methyl-N-(2-methylbut-1-en-3-yl)aniline (3f) (53% ee)

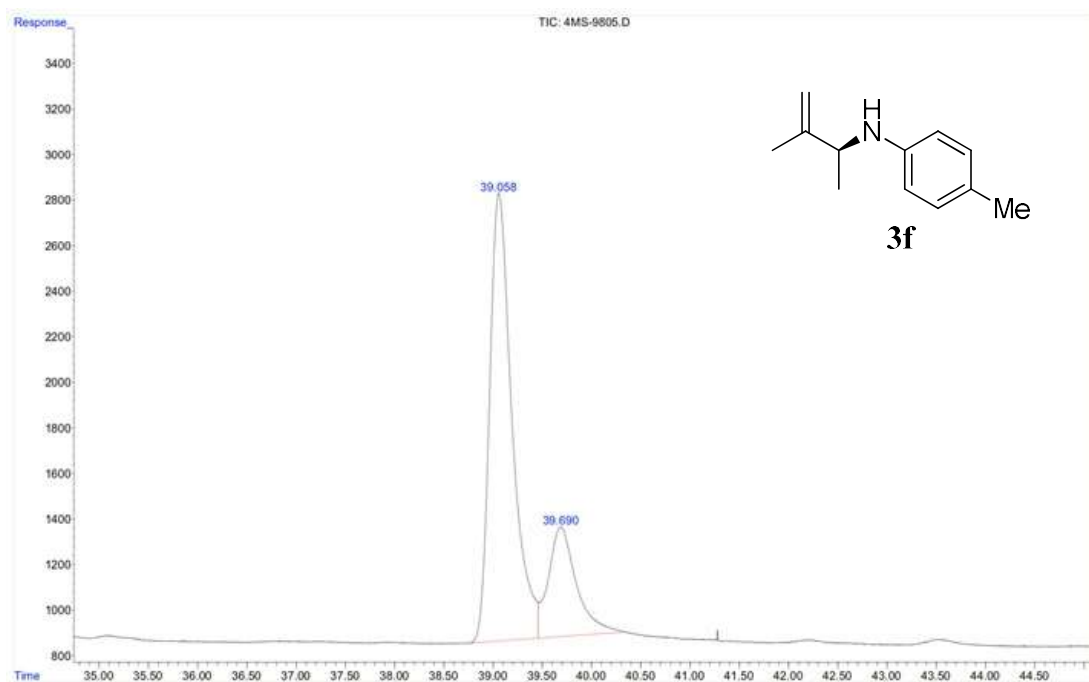

| Ret Time | Type | Width | Area   | Start Time | End Time |
|----------|------|-------|--------|------------|----------|
| 39.058   | BV   | 0.237 | 310754 | 38.723     | 39.458   |
| 39.690   | VB   | 0.291 | 95390  | 39.458     | 40.340   |

**Racemic: 4-methyl-N-(2-methylpent-1-en-3-yl)aniline (3g)**

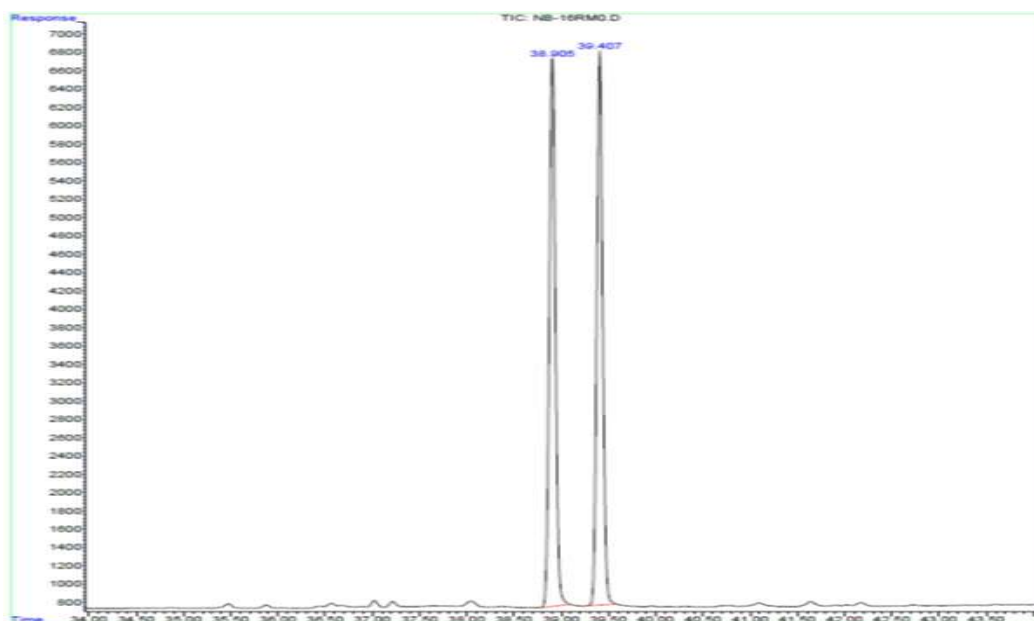

| R.T.<br>min | Start<br>min | End<br>min | peak<br>height | peak<br>area |
|-------------|--------------|------------|----------------|--------------|
| 38.905      | 38.775       | 39.092     | 5972           | 270719       |
| 39.407      | 39.259       | 39.582     | 6017           | 260605       |

**Chiral: (*S*)-4-methyl-N-(2-methylpent-1-en-3-yl)aniline (3g): (72% *ee*)**

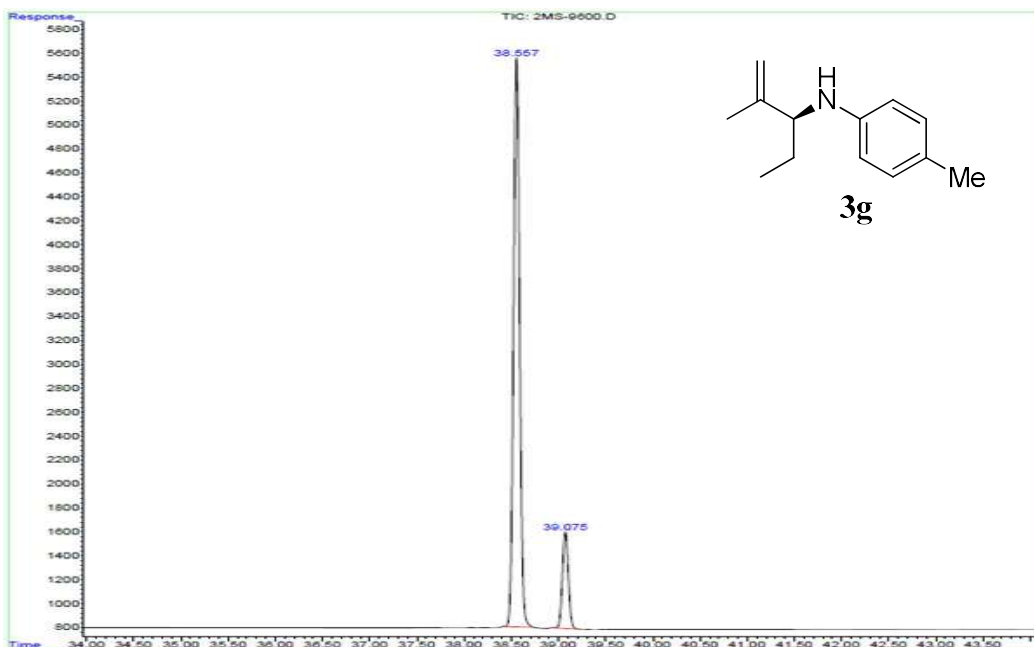

| R.T.<br>min | Start<br>min | End<br>min | peak<br>height | peak<br>area |
|-------------|--------------|------------|----------------|--------------|
| 38.557      | 38.410       | 38.730     | 4752           | 212764       |
| 39.075      | 38.925       | 39.198     | 807            | 35243        |

**Racemic: 4-methyl-N-(2-methylhept-1-en-3-yl)aniline (3h)**

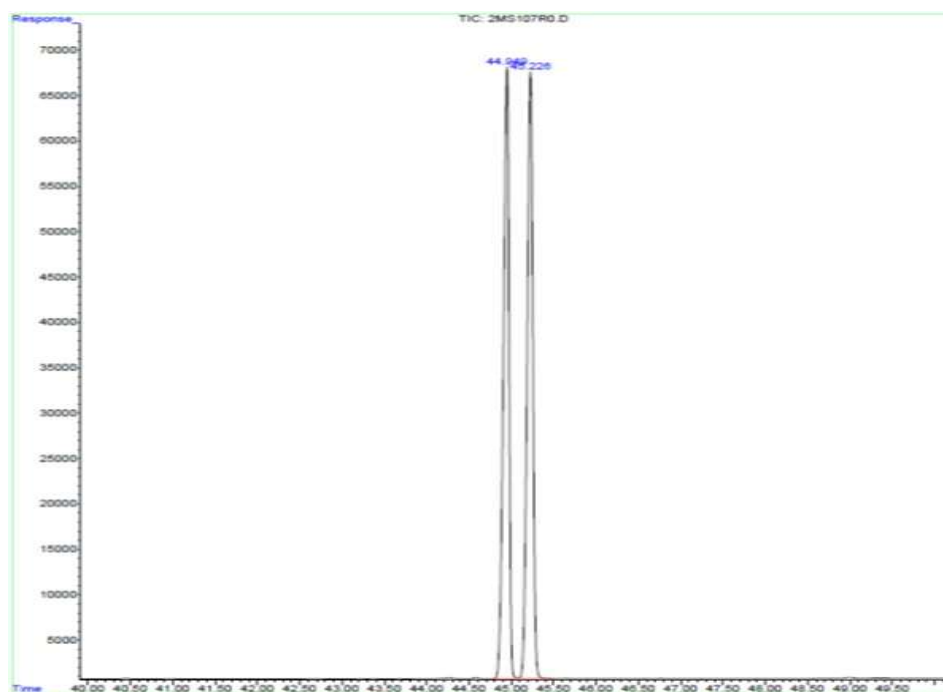

| R.T.<br>min | Start<br>min | End<br>min | peak<br>height | peak<br>area |
|-------------|--------------|------------|----------------|--------------|
| 44.949      | 44.780       | 45.080     | 67237          | 3108182      |
| 45.226      | 45.080       | 45.487     | 66827          | 3120968      |

**Chiral: (*S*)-4-methyl-N-(2-methylhept-1-en-3-yl)aniline (3h): (66% *ee*)**

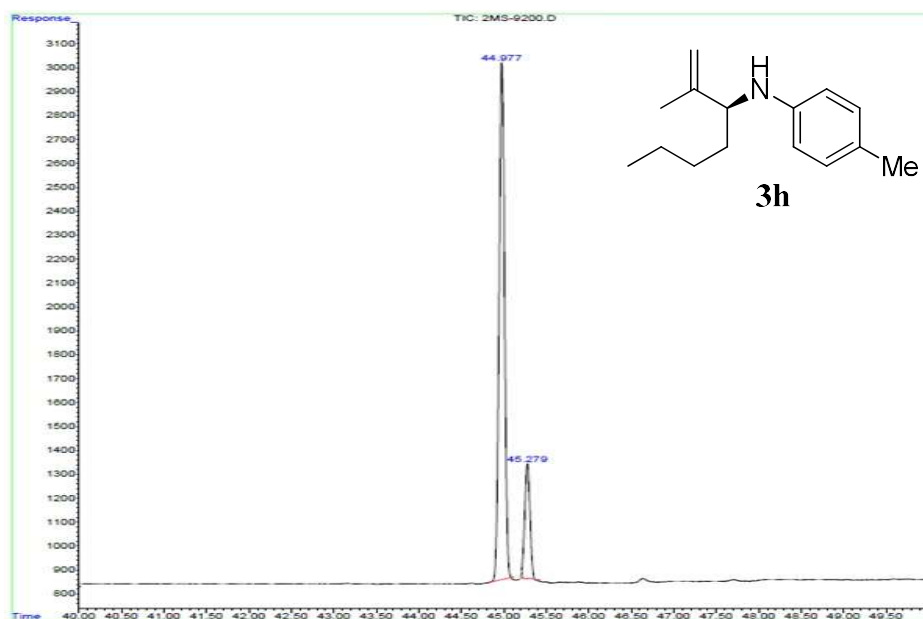

| R.T.<br>min | Start<br>min | End<br>min | peak<br>height | peak<br>area |
|-------------|--------------|------------|----------------|--------------|
| 44.977      | 44.834       | 45.093     | 2161           | 96305        |
| 45.279      | 45.154       | 45.399     | 473            | 20106        |

**Racemic: 4-methyl-N-(2,5-dimethylhex-1-en-3-yl)aniline (3i)**

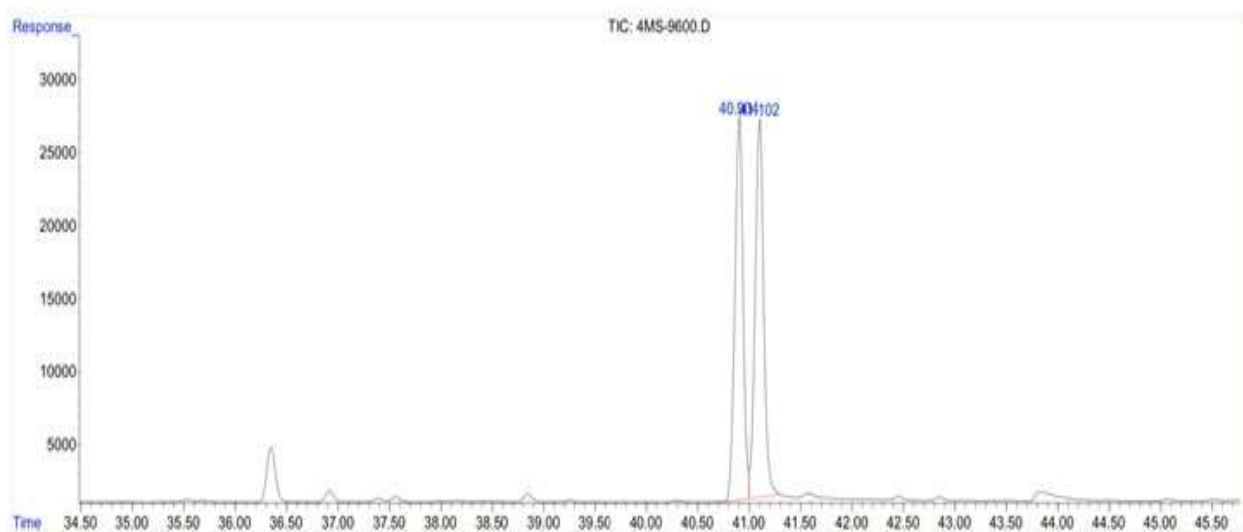

| Ret Time | Type | Width | Area    | Start Time | End Time |
|----------|------|-------|---------|------------|----------|
| 40.904   | BV   | 0.086 | 1444689 | 40.738     | 40.998   |
| 41.102   | VB   | 0.090 | 1502621 | 40.998     | 41.306   |

**Chiral: (S)-4-methyl-N-(2,5-dimethylhex-1-en-3-yl)aniline (3i) (46% ee)**

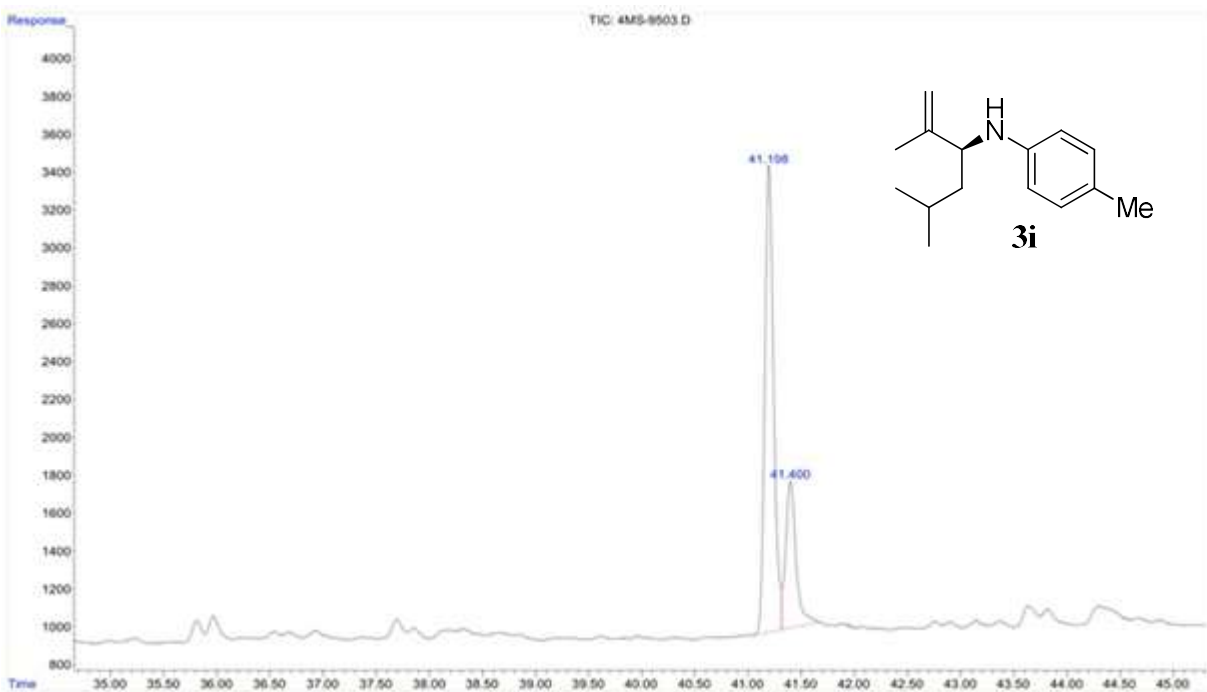

| Ret Time | Type | Width | Area   | Start Time | End Time |
|----------|------|-------|--------|------------|----------|
| 41.198   | BV   | 0.090 | 141964 | 41.053     | 41.317   |
| 41.400   | VB   | 0.103 | 52515  | 41.317     | 41.665   |

## Racemic: 4-iodo-*N*-(3-methylbut-3-en-2-yl)aniline (**3j**)

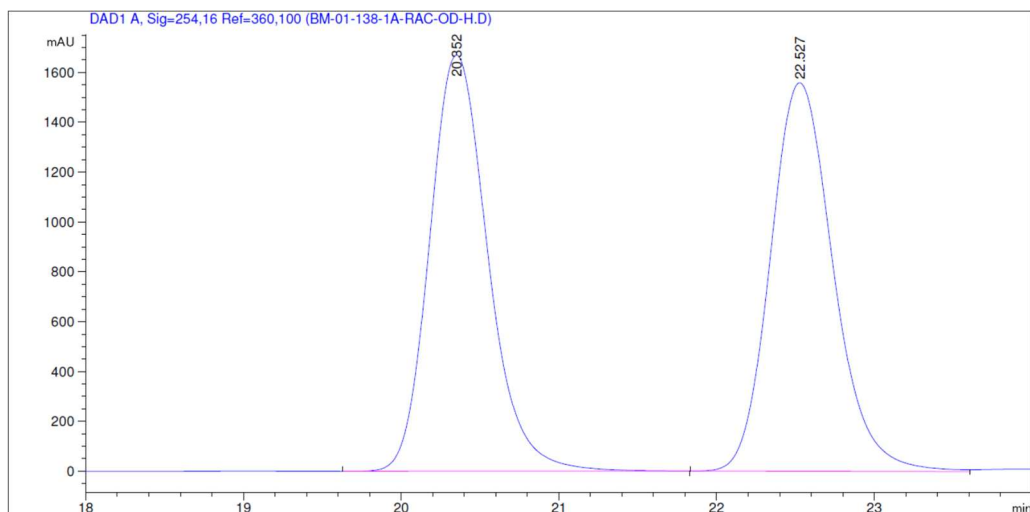

Signal 1: DAD1 A, Sig=254,16 Ref=360,100

| Peak # | RetTime [min] | Type | Width [min] | Area [mAU*s] | Height [mAU] | Area %  |
|--------|---------------|------|-------------|--------------|--------------|---------|
| 1      | 20.352        | BB   | 0.3976      | 4.28942e4    | 1670.16455   | 49.8265 |
| 2      | 22.527        | EV   | 0.4272      | 4.31929e4    | 1559.32898   | 50.1735 |

Totals : 8.60870e4 3229.49353

## Chiral: (*S*)-4-iodo-*N*-(3-methylbut-3-en-2-yl)aniline (**3j**) (70% *ee*)

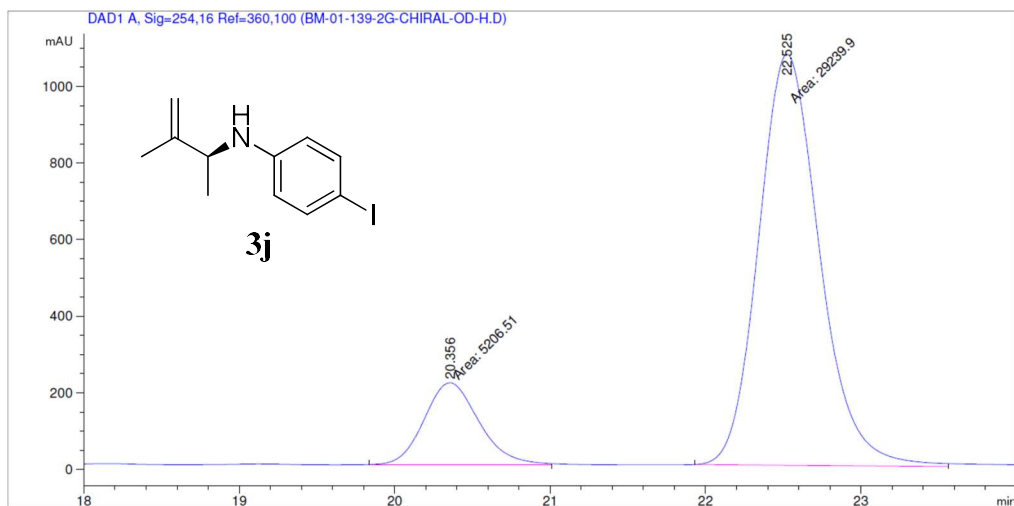

Signal 1: DAD1 A, Sig=254,16 Ref=360,100

| Peak # | RetTime [min] | Type | Width [min] | Area [mAU*s] | Height [mAU] | Area %  |
|--------|---------------|------|-------------|--------------|--------------|---------|
| 1      | 20.356        | PM   | 0.4066      | 5206.51123   | 213.43393    | 15.1148 |
| 2      | 22.525        | PM   | 0.4539      | 2.92399e4    | 1073.54565   | 84.8852 |

Totals : 3.44464e4 1286.97958

**Racemic: 4-iodo-*N*-(2-methylpent-1-en-3-yl)aniline (3k)**

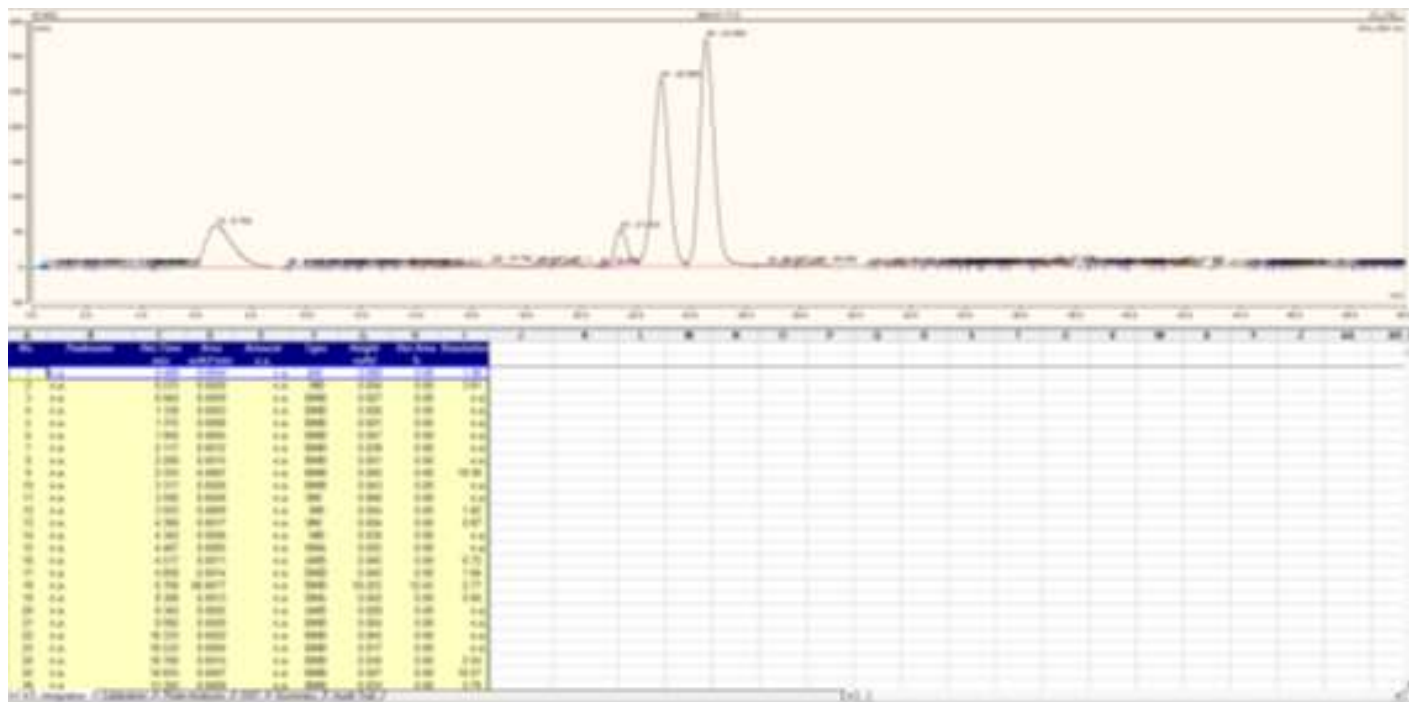

tr<sub>1</sub>-22.90, tr<sub>2</sub>-24.55

**Chiral: (*S*)-4-iodo-*N*-(2-methylpent-1-en-3-yl)aniline (3k) (79% *ee*)**

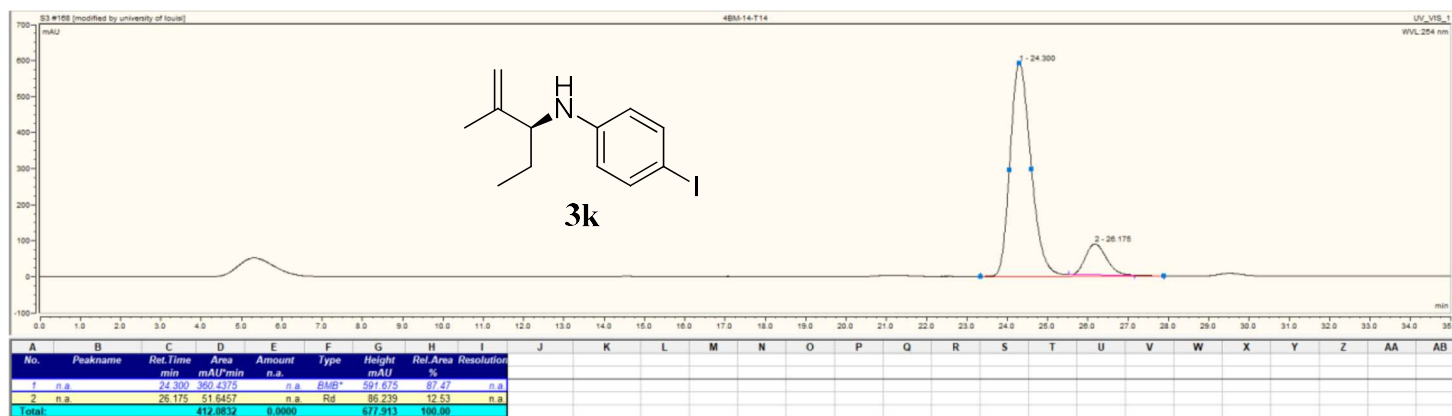

tr<sub>1</sub>-23.15, tr<sub>2</sub>-25.50

## Racemic: 4-iodo-*N*-(2-methylhex-1-en-3-yl)aniline (**31**)

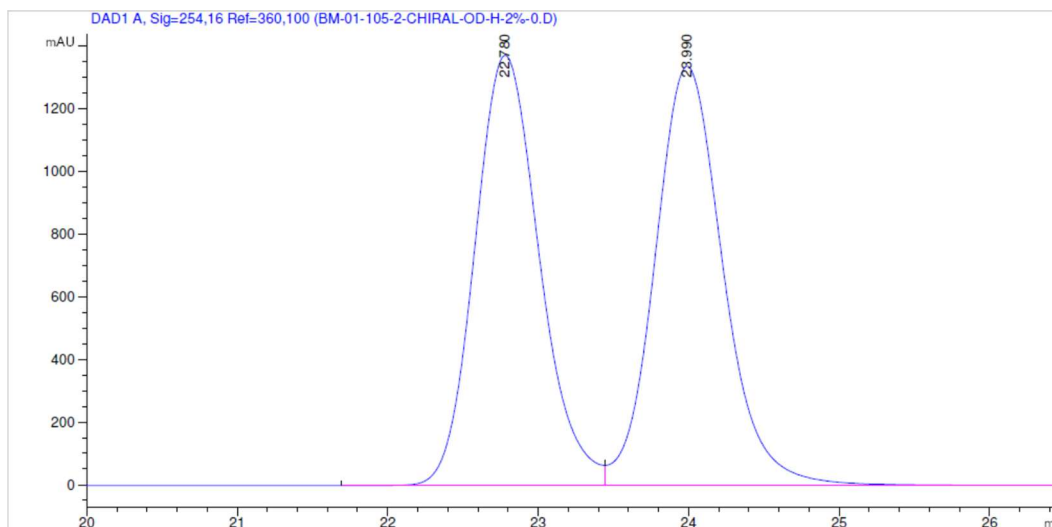

| Peak #   | RetTime [min] | Type | Width [min] | Area [mAU*s] | Height [mAU] | Area %  |
|----------|---------------|------|-------------|--------------|--------------|---------|
| 1        | 22.780        | BV   | 0.4631      | 4.08410e4    | 1372.93347   | 49.2277 |
| 2        | 23.990        | VB   | 0.4851      | 4.21225e4    | 1338.57227   | 50.7723 |
| Totals : |               |      |             | 8.29635e4    | 2711.50574   |         |

## Chiral: (*S*)-4-iodo-*N*-(2-methylhex-1-en-3-yl)aniline (**31**) (60% *ee*)

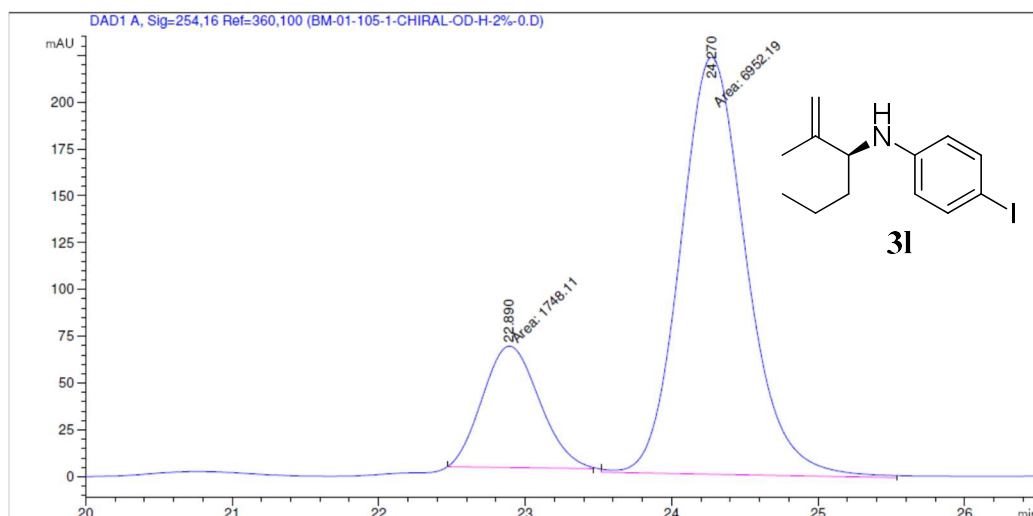

Signal 1: DAD1 A, Sig=254,16 Ref=360,100

| Peak #   | RetTime [min] | Type | Width [min] | Area [mAU*s] | Height [mAU] | Area %  |
|----------|---------------|------|-------------|--------------|--------------|---------|
| 1        | 22.890        | MM   | 0.4493      | 1748.11011   | 64.84074     | 20.0925 |
| 2        | 24.270        | MM   | 0.5202      | 6952.18652   | 222.72963    | 79.9075 |
| Totals : |               |      |             | 8700.29663   | 287.57037    |         |



**Racemic: 4-iodo-*N*-(2-methylhept-1-en-3-yl)aniline (3m)**

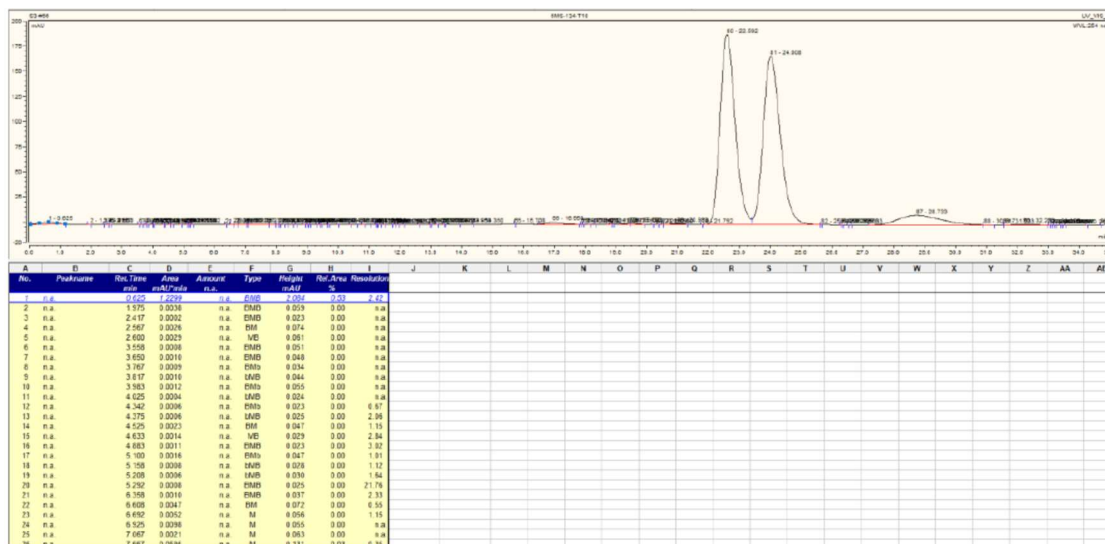

tr<sub>1</sub>-22.59, tr<sub>2</sub>-24.01

**Chiral: (*S*)-4-iodo-*N*-(2-methylhept-1-en-3-yl)aniline (3m) (73% *ee*)**

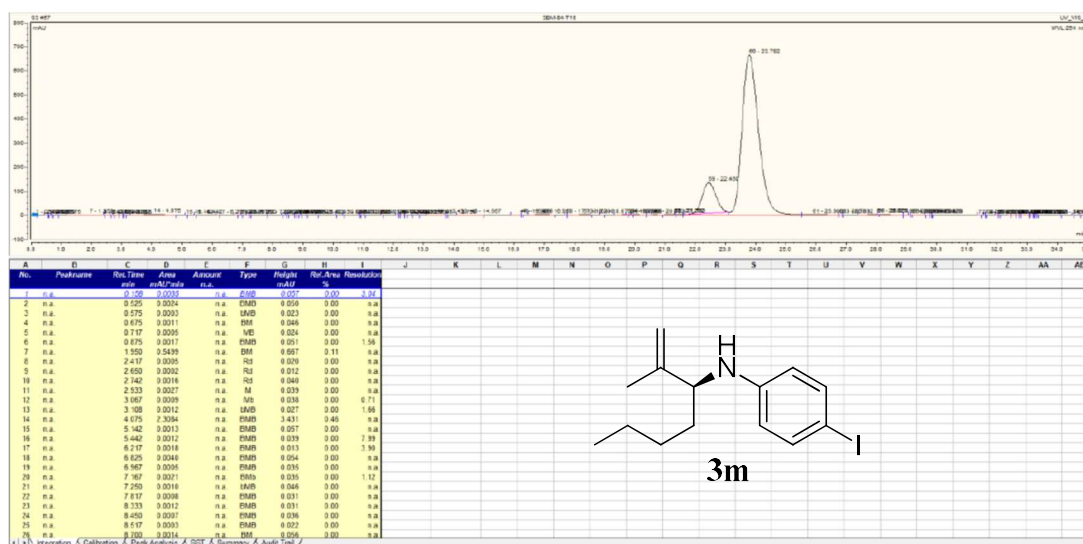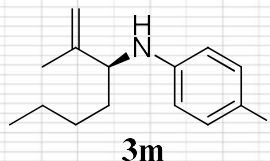

tr<sub>1</sub>-22.45, tr<sub>2</sub>-23.8

### Racemic: *N*-(2,5-dimethylhex-1-en-3-yl)-4-iodoaniline (**3n**)

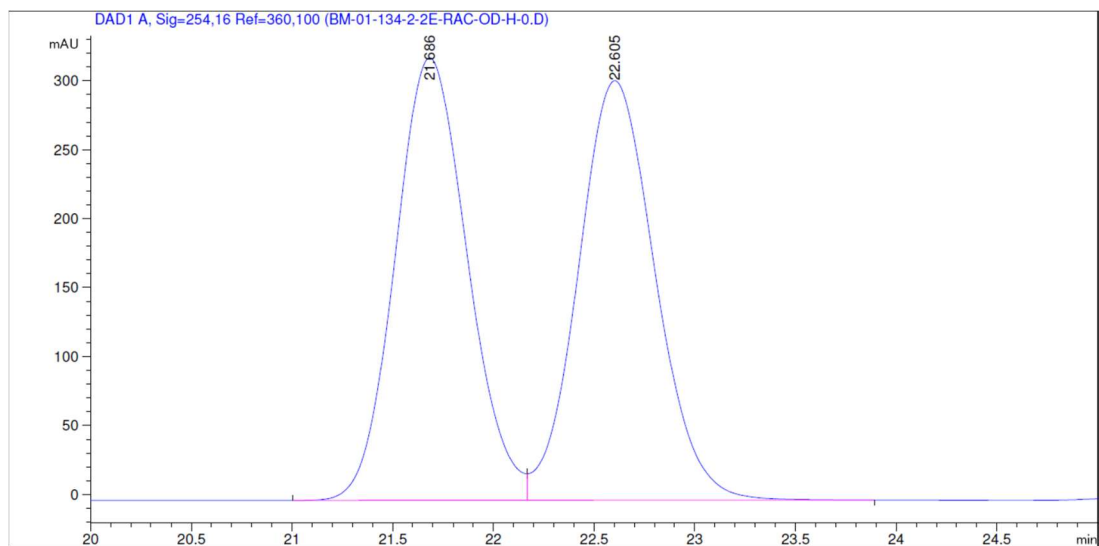

| Peak #   | RetTime [min] | Type | Width [min] | Area [mAU*s] | Height [mAU] | Area %  |
|----------|---------------|------|-------------|--------------|--------------|---------|
| 1        | 21.686        | BV   | 0.3882      | 7981.36572   | 320.84698    | 49.7284 |
| 2        | 22.605        | VB   | 0.4134      | 8068.55908   | 304.20215    | 50.2716 |
| Totals : |               |      |             | 1.60499e4    | 625.04913    |         |

### Chiral: (*S*)-*N*-(2,5-dimethylhex-1-en-3-yl)-4-iodoaniline (**3n**) (61% *ee*)

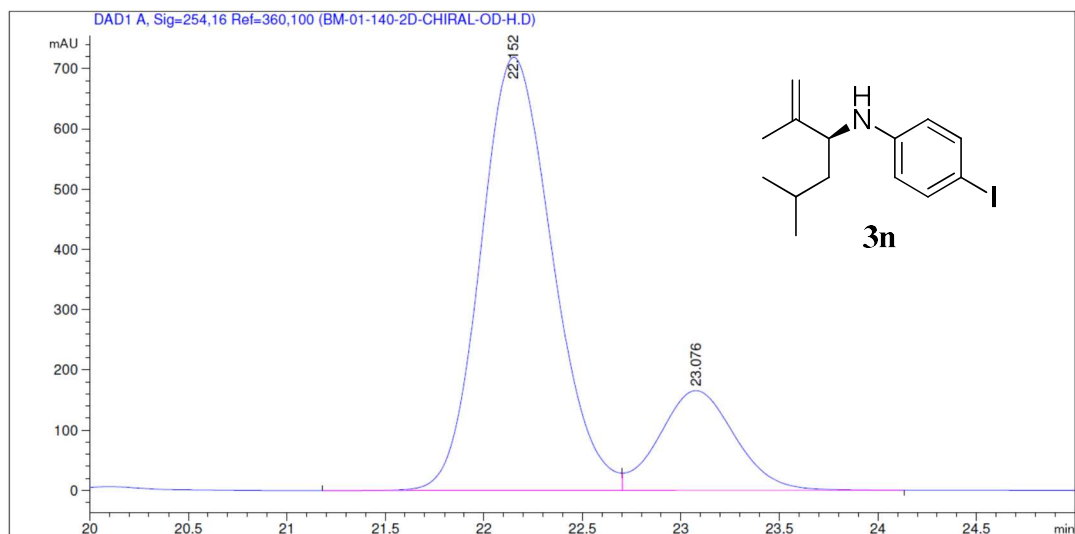

| Peak #   | RetTime [min] | Type | Width [min] | Area [mAU*s] | Height [mAU] | Area %  |
|----------|---------------|------|-------------|--------------|--------------|---------|
| 1        | 22.152        | BV   | 0.3951      | 1.81897e4    | 719.21979    | 80.5138 |
| 2        | 23.076        | VB   | 0.4103      | 4402.32813   | 165.50386    | 19.4862 |
| Totals : |               |      |             | 2.25920e4    | 884.72365    |         |

**Racemic: 4-bromo-*N*-(2-methylpent-1-en-3-yl)aniline (3o)**

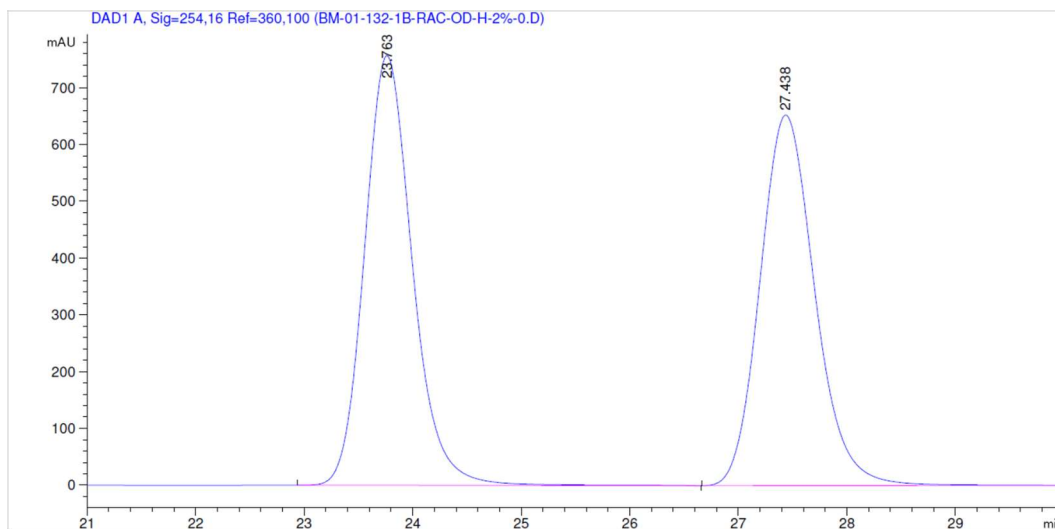

| Peak #   | RetTime [min] | Type | Width [min] | Area [mAU*s] | Height [mAU] | Area %  |
|----------|---------------|------|-------------|--------------|--------------|---------|
| 1        | 23.763        | BB   | 0.4734      | 2.31897e4    | 756.89630    | 50.3111 |
| 2        | 27.438        | BB   | 0.5472      | 2.29029e4    | 653.03748    | 49.6889 |
| Totals : |               |      |             | 4.60926e4    | 1409.93378   |         |

**Chiral: (*S*)-4-bromo-*N*-(2-methylpent-1-en-3-yl)aniline (3o) (48% ee)**

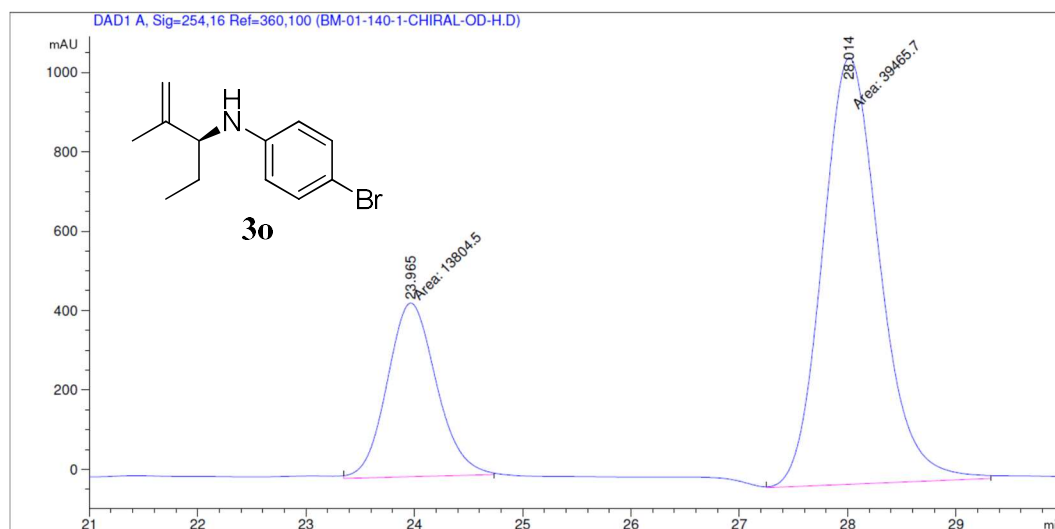

| Peak #   | RetTime [min] | Type | Width [min] | Area [mAU*s] | Height [mAU] | Area %  |
|----------|---------------|------|-------------|--------------|--------------|---------|
| 1        | 23.965        | MM   | 0.5259      | 1.38045e4    | 437.45798    | 25.9141 |
| 2        | 28.014        | MM   | 0.6123      | 3.94657e4    | 1074.28857   | 74.0859 |
| Totals : |               |      |             | 5.32701e4    | 1511.74655   |         |

## Racemic: 4-bromo-*N*-(2-methylhex-1-en-3-yl)aniline (3p)

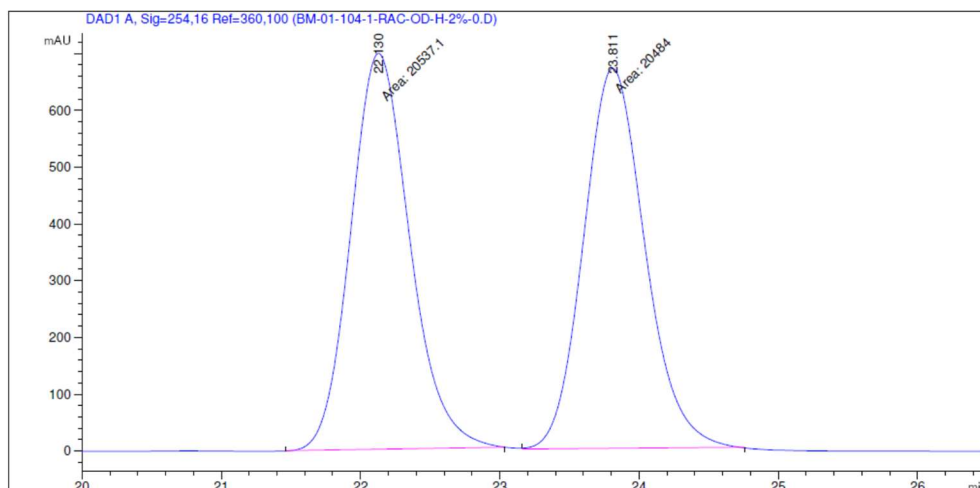

| Peak # | RetTime [min] | Type | Width [min] | Area [mAU*s] | Height [mAU] | Area %  |
|--------|---------------|------|-------------|--------------|--------------|---------|
| 1      | 22.130        | MM   | 0.4908      | 2.05371e4    | 697.40369    | 50.0646 |
| 2      | 23.811        | MM   | 0.5100      | 2.04840e4    | 669.34784    | 49.9354 |

Totals : 4.10211e4 1366.75153

## Chiral: (*S*)-4-bromo-*N*-(2-methylhex-1-en-3-yl)aniline (3p) (63% *ee*)

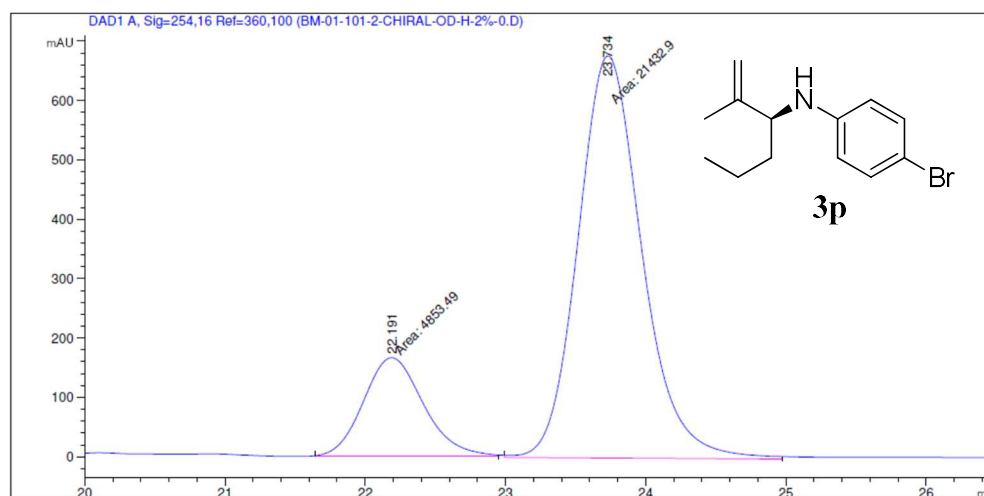

Signal 1: DAD1 A, Sig=254,16 Ref=360,100

| Peak # | RetTime [min] | Type | Width [min] | Area [mAU*s] | Height [mAU] | Area %  |
|--------|---------------|------|-------------|--------------|--------------|---------|
| 1      | 22.191        | MM   | 0.4904      | 4853.48682   | 164.95062    | 18.4639 |
| 2      | 23.734        | MM   | 0.5273      | 2.14329e4    | 677.49182    | 81.5361 |

Totals : 2.62864e4 842.44244

## Racemic: 4-bromo-*N*-(2-methylhept-1-en-3-yl)aniline (3q)

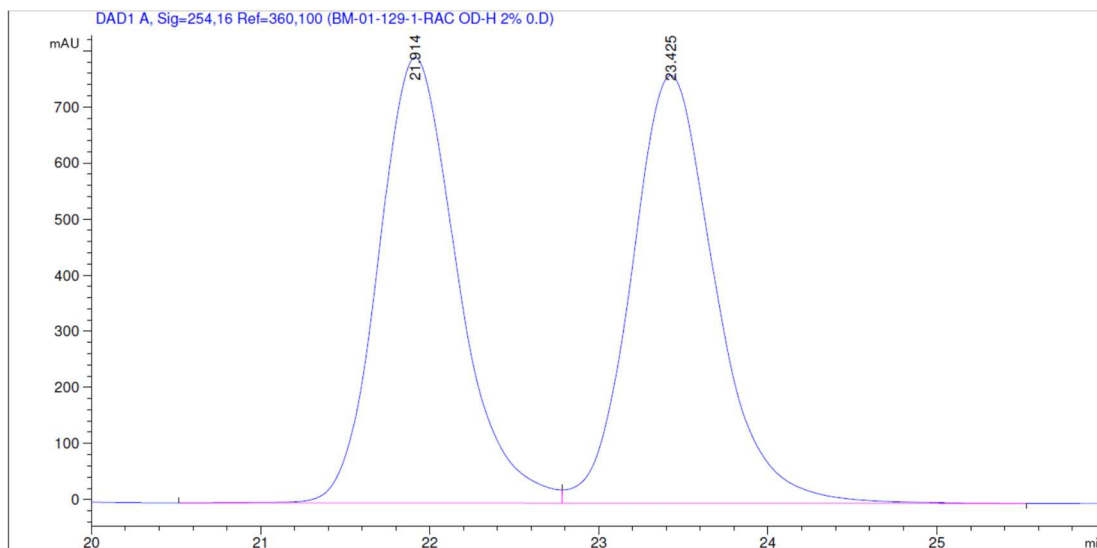

| Peak #   | RetTime [min] | Type | Width [min] | Area [mAU*s] | Height [mAU] | Area %  |
|----------|---------------|------|-------------|--------------|--------------|---------|
| 1        | 21.914        | BV   | 0.5113      | 2.58309e4    | 794.48883    | 49.5655 |
| 2        | 23.425        | VB   | 0.5200      | 2.62838e4    | 762.81140    | 50.4345 |
| Totals : |               |      |             | 5.21147e4    | 1557.30023   |         |

## Chiral: (*S*)-4-bromo-*N*-(2-methylhept-1-en-3-yl)aniline (3q) (60% *ee*)

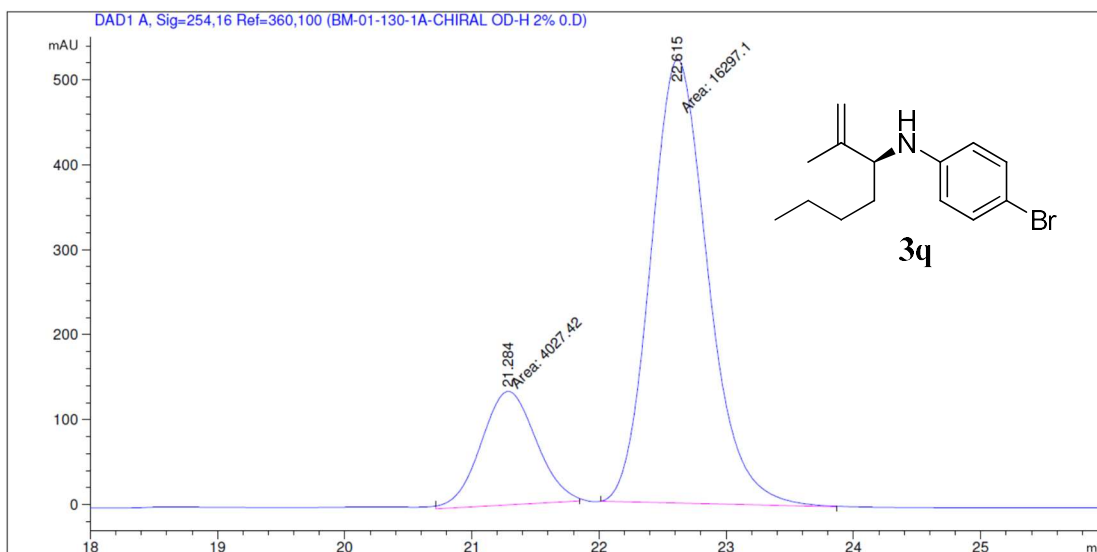

| Peak #   | RetTime [min] | Type | Width [min] | Area [mAU*s] | Height [mAU] | Area %  |
|----------|---------------|------|-------------|--------------|--------------|---------|
| 1        | 21.284        | MM   | 0.5019      | 4027.42285   | 133.72746    | 19.8155 |
| 2        | 22.615        | PM   | 0.5199      | 1.62971e4    | 522.41565    | 80.1845 |
| Totals : |               |      |             | 2.03246e4    | 656.14311    |         |

**Racemic: 4-((2-methylhept-1-en-3-yl)amino)benzonitrile (3r)**

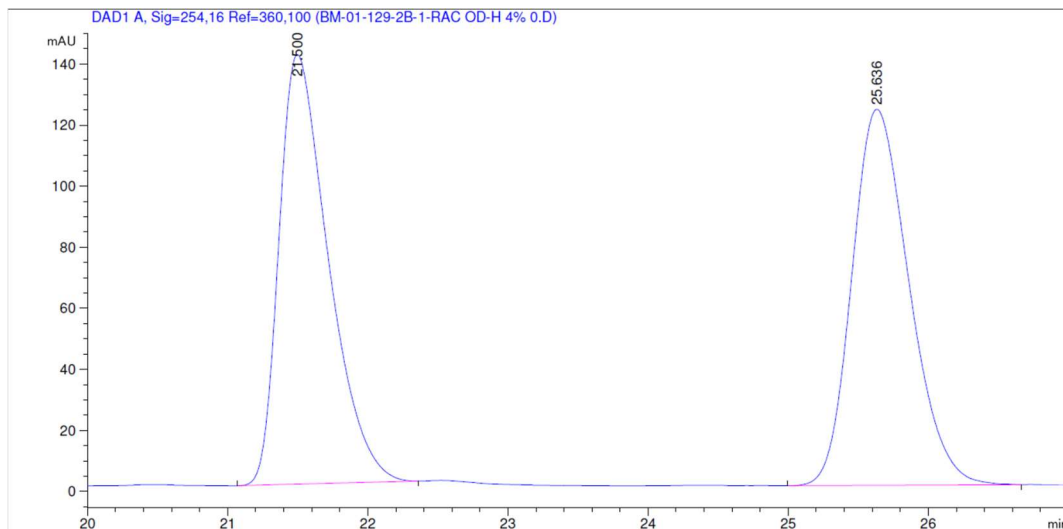

| Peak #   | RetTime [min] | Type | Width [min] | Area [mAU*s] | Height [mAU] | Area %  |
|----------|---------------|------|-------------|--------------|--------------|---------|
| 1        | 21.500        | BB   | 0.3728      | 3436.03882   | 140.74513    | 49.6385 |
| 2        | 25.636        | BB   | 0.4361      | 3486.09033   | 123.21353    | 50.3615 |
| Totals : |               |      |             | 6922.12915   | 263.95866    |         |

**Chiral: (S)-4-((2-methylhept-1-en-3-yl)amino)benzonitrile (3r) (26% ee)**

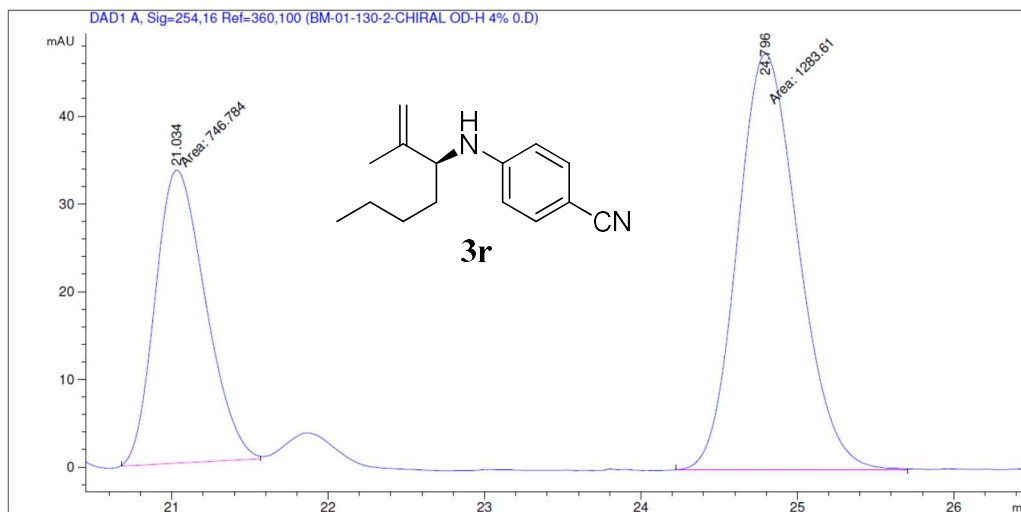

| Peak #   | RetTime [min] | Type | Width [min] | Area [mAU*s] | Height [mAU] | Area %  |
|----------|---------------|------|-------------|--------------|--------------|---------|
| 1        | 21.034        | PM   | 0.3724      | 746.78448    | 33.41962     | 36.7802 |
| 2        | 24.796        | PM   | 0.4516      | 1283.61487   | 47.37314     | 63.2198 |
| Totals : |               |      |             | 2030.39935   | 80.79276     |         |

**Racemic: 3-iodo-*N*-(2-methylpent-1-en-3-yl)aniline (3s)**

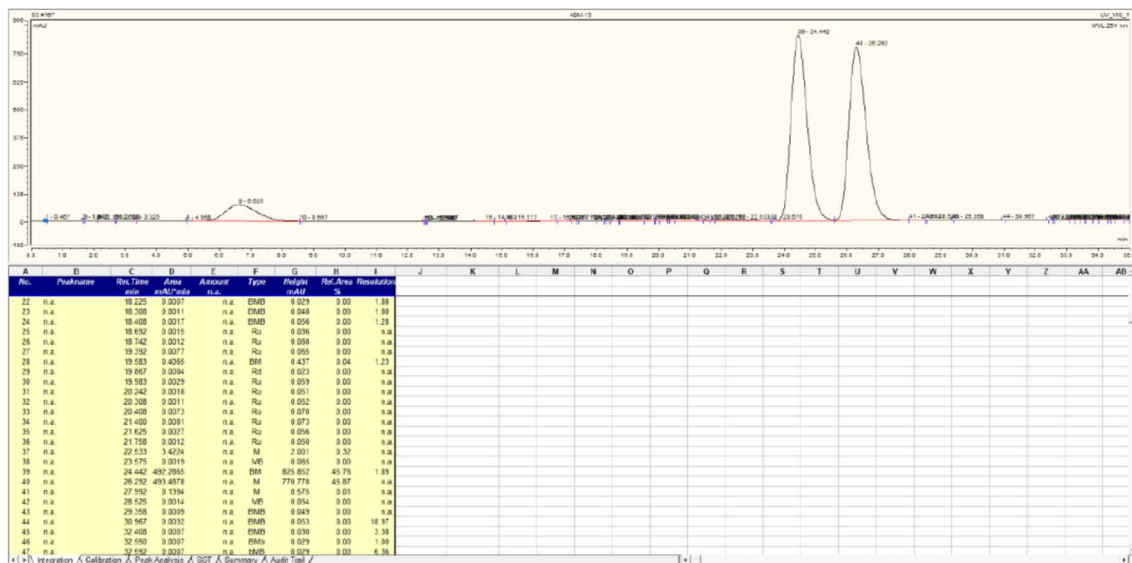

(tr<sub>1</sub>-24.44, tr<sub>2</sub>-26.29)

**Chiral: (*S*)-3-iodo-*N*-(2-methylpent-1-en-3-yl)aniline (3s) (75% ee)**

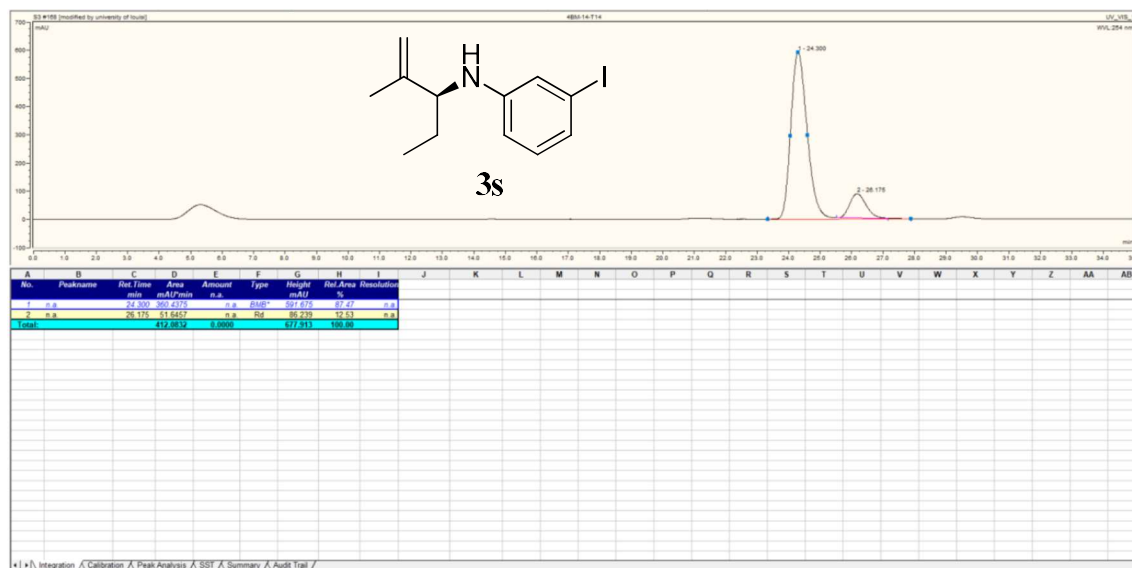

(tr<sub>1</sub>-24.30, tr<sub>2</sub>-26.18)

**Racemic: 2-iodo-*N*-(2-methylpent-1-en-3-yl)aniline (3t)**

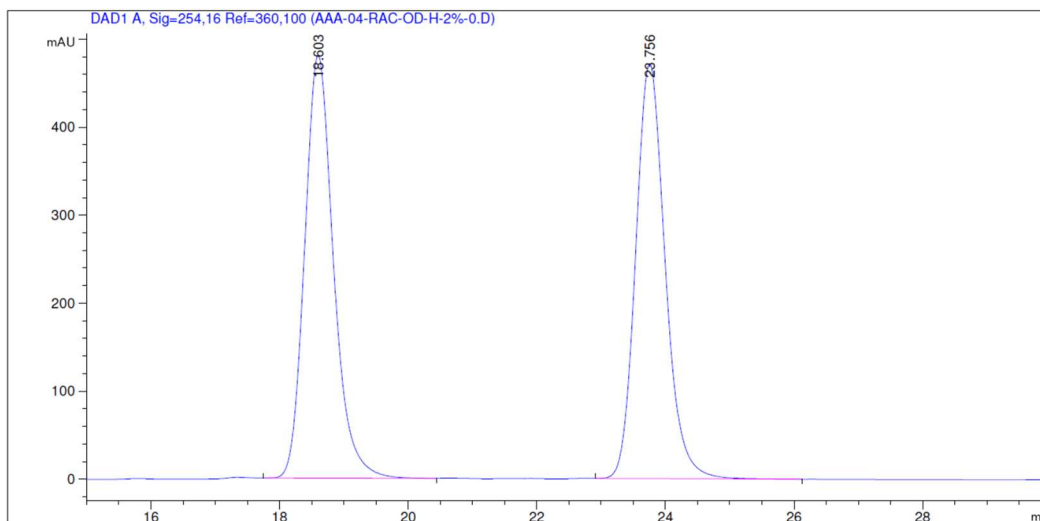

| Peak #   | RetTime [min] | Type | Width [min] | Area [mAU*s] | Height [mAU] | Area %  |
|----------|---------------|------|-------------|--------------|--------------|---------|
| 1        | 18.603        | BB   | 0.4773      | 1.49611e4    | 480.44565    | 49.9420 |
| 2        | 23.756        | BB   | 0.4909      | 1.49958e4    | 471.74524    | 50.0580 |
| Totals : |               |      |             | 2.99569e4    | 952.19089    |         |

**Chiral: (*S*)-2-iodo-*N*-(2-methylpent-1-en-3-yl)aniline (3t) (29% ee)**

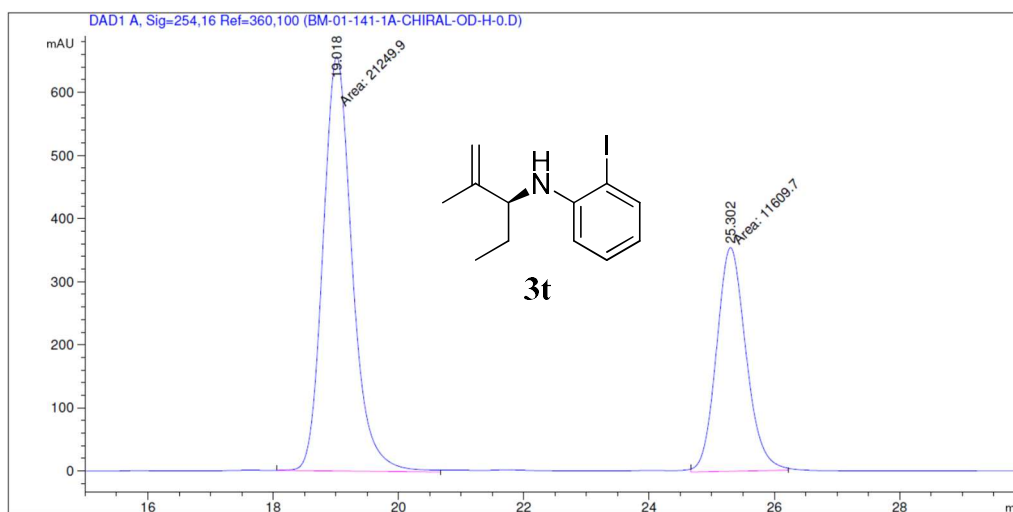

| Peak #   | RetTime [min] | Type | Width [min] | Area [mAU*s] | Height [mAU] | Area %  |
|----------|---------------|------|-------------|--------------|--------------|---------|
| 1        | 19.018        | PM   | 0.5393      | 2.12499e4    | 656.67297    | 64.6688 |
| 2        | 25.302        | MM   | 0.5457      | 1.16097e4    | 354.56409    | 35.3312 |
| Totals : |               |      |             | 3.28596e4    | 1011.23706   |         |



## Racemic: Ethyl 2-methylene-3-(phenylamino)butanoate (3u)

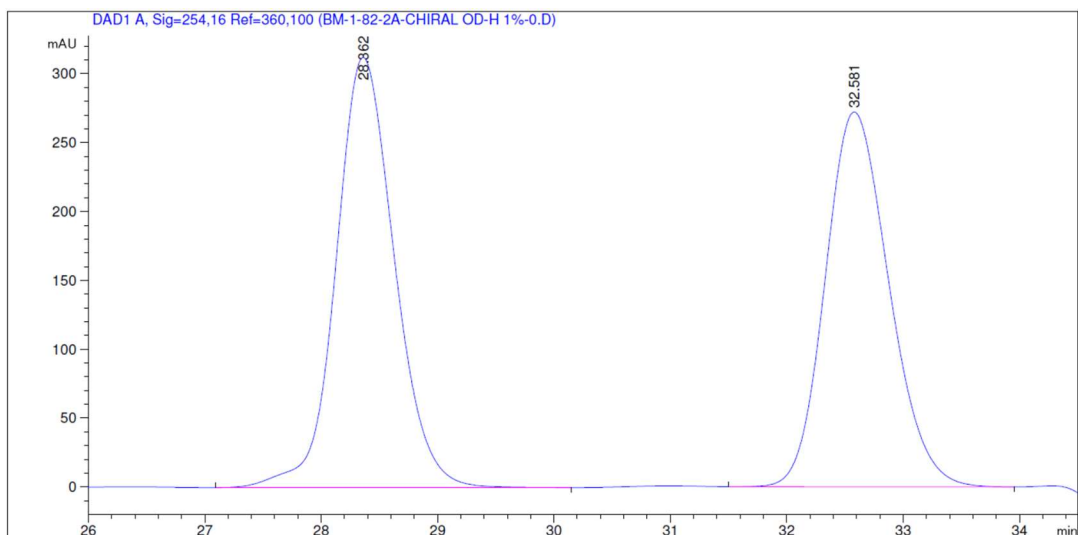

| Peak #   | RetTime [min] | Type | Width [min] | Area [mAU*s] | Height [mAU] | Area %  |
|----------|---------------|------|-------------|--------------|--------------|---------|
| 1        | 28.362        | BB   | 0.5366      | 1.08856e4    | 312.35538    | 51.2626 |
| 2        | 32.581        | BB   | 0.5936      | 1.03493e4    | 272.20889    | 48.7374 |
| Totals : |               |      |             | 2.12349e4    | 584.56427    |         |

## Chiral: (S)-ethyl 2-methylene-3-(phenylamino)butanoate (3u) (23% ee)

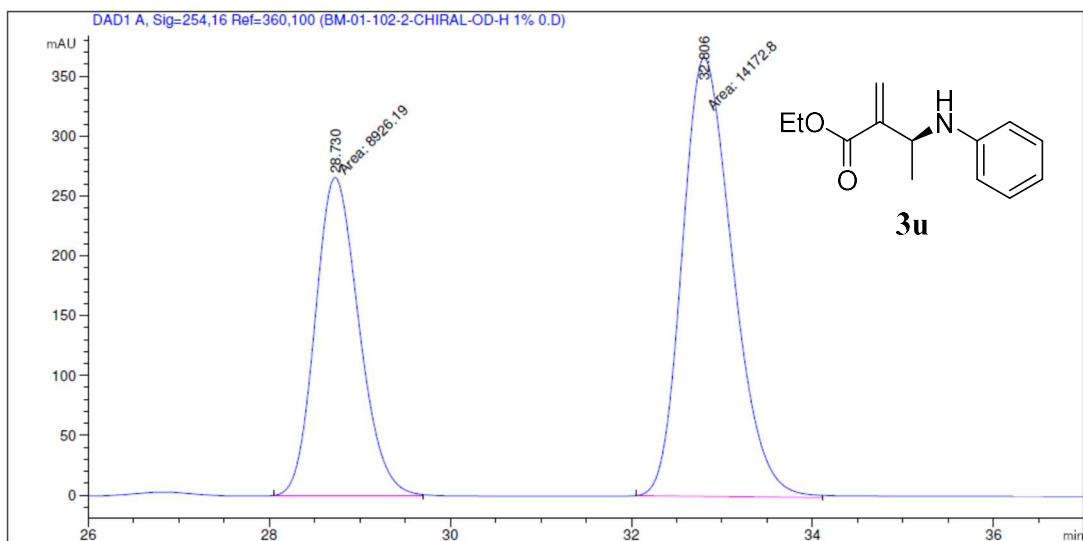

Signal 1: DAD1 A, Sig=254,16 Ref=360,100

| Peak #   | RetTime [min] | Type | Width [min] | Area [mAU*s] | Height [mAU] | Area %  |
|----------|---------------|------|-------------|--------------|--------------|---------|
| 1        | 28.730        | MM   | 0.5598      | 8926.19336   | 265.74686    | 38.6433 |
| 2        | 32.806        | PM   | 0.6451      | 1.41728e4    | 366.14670    | 61.3567 |
| Totals : |               |      |             | 2.30990e4    | 631.89355    |         |

### Racemic: Ethyl 2-methylene-3-(phenylamino)butanoate (3u)

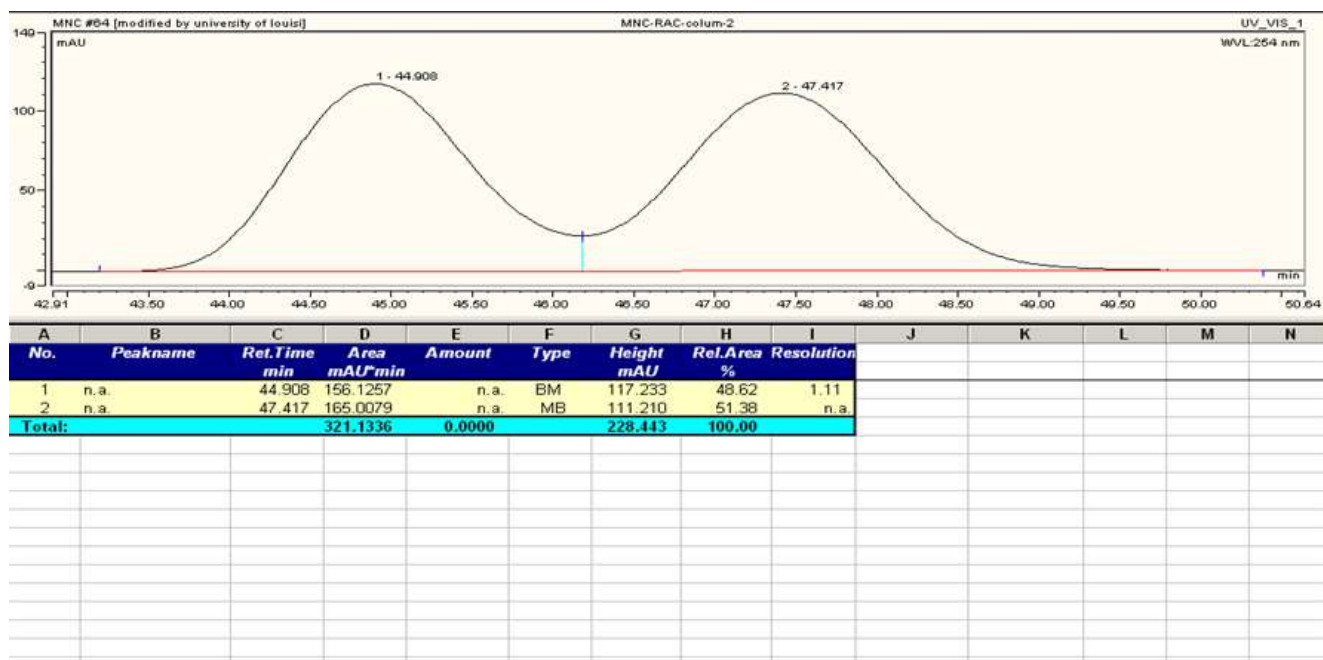

RAC (OD-H column) 0.3 ml flow rate and 99.3% hexane 0.7% IPA, RT = 44 and 48 run time 80 min.

### Chiral: (S)-ethyl 2-methylene-3-(phenylamino)butanoate (3u) (51% ee)

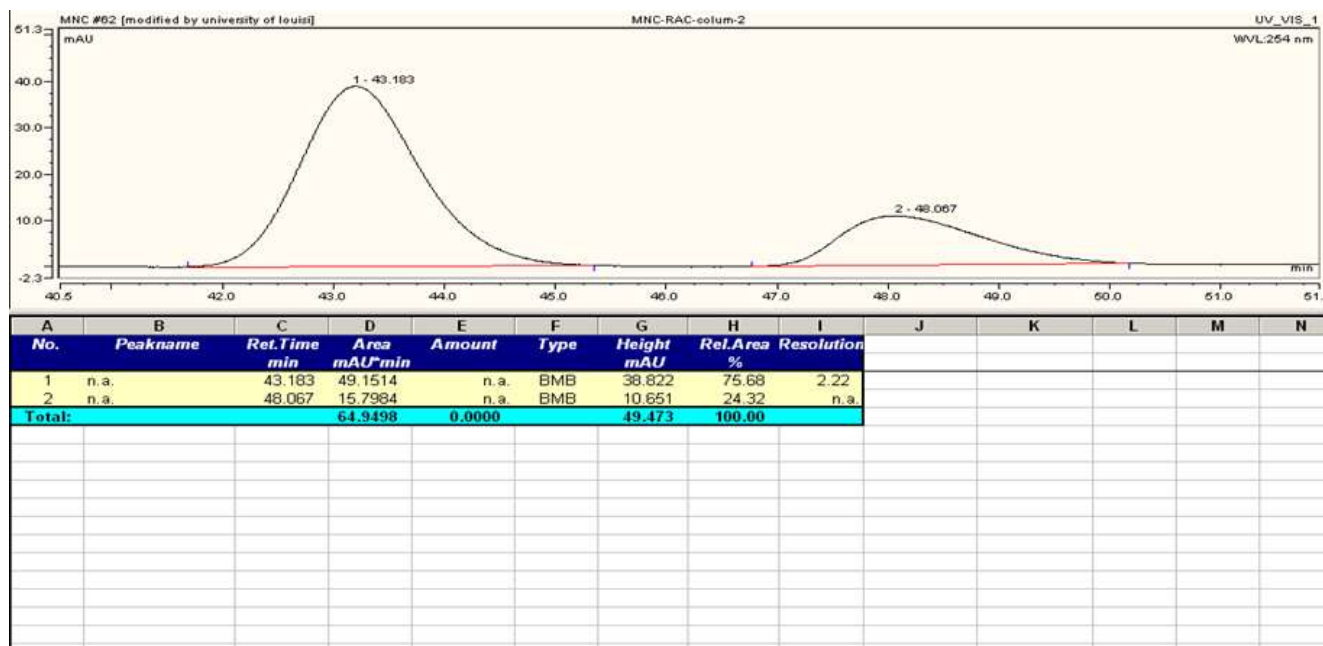

(OD-H column) 0.3 ml flow rate and 99.3% hexane 0.7% IPA, RT = 43 and 48 run time 80 min.

## Racemic: *N*-(3-methylenepent-4-en-2-yl)aniline (**3v**)

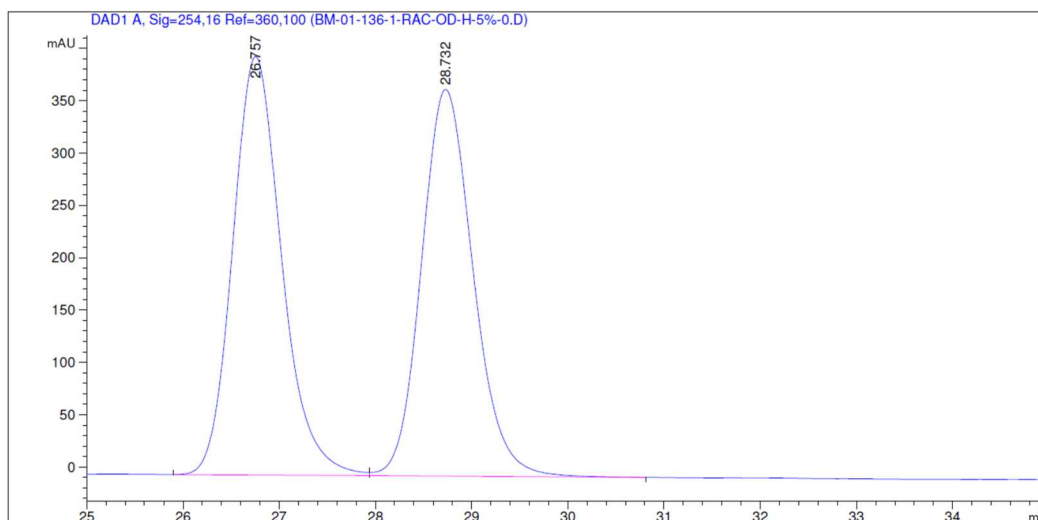

| Peak #   | RetTime [min] | Type | Width [min] | Area [mAU*s] | Height [mAU] | Area %  |
|----------|---------------|------|-------------|--------------|--------------|---------|
| 1        | 26.757        | BV   | 0.5463      | 1.41309e4    | 399.82385    | 50.5862 |
| 2        | 28.732        | VB   | 0.5759      | 1.38034e4    | 369.47177    | 49.4138 |
| Totals : |               |      |             | 2.79343e4    | 769.29562    |         |

## Chiral: (*S*)-*N*-(3-methylenepent-4-en-2-yl)aniline (**3v**) (40% *ee*)

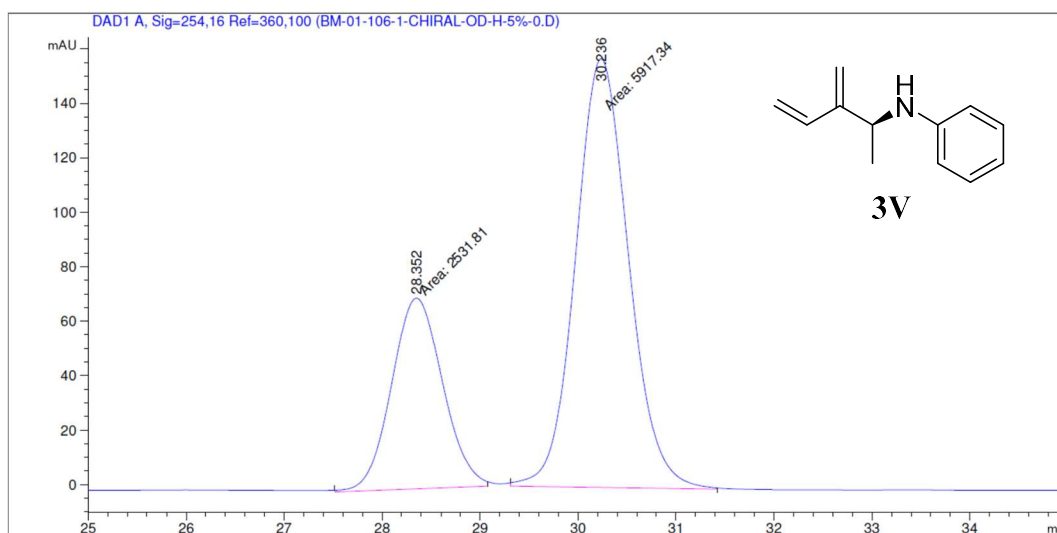

| Peak #   | RetTime [min] | Type | Width [min] | Area [mAU*s] | Height [mAU] | Area %  |
|----------|---------------|------|-------------|--------------|--------------|---------|
| 1        | 28.352        | MM   | 0.6029      | 2531.80664   | 69.99104     | 29.9652 |
| 2        | 30.236        | MM   | 0.6267      | 5917.33887   | 157.37259    | 70.0348 |
| Totals : |               |      |             | 8449.14551   | 227.36362    |         |

**Racemic: (S,E)-N-(7-methyl-3-methyleneocta-4,6-dien-2-yl)aniline (3w)**

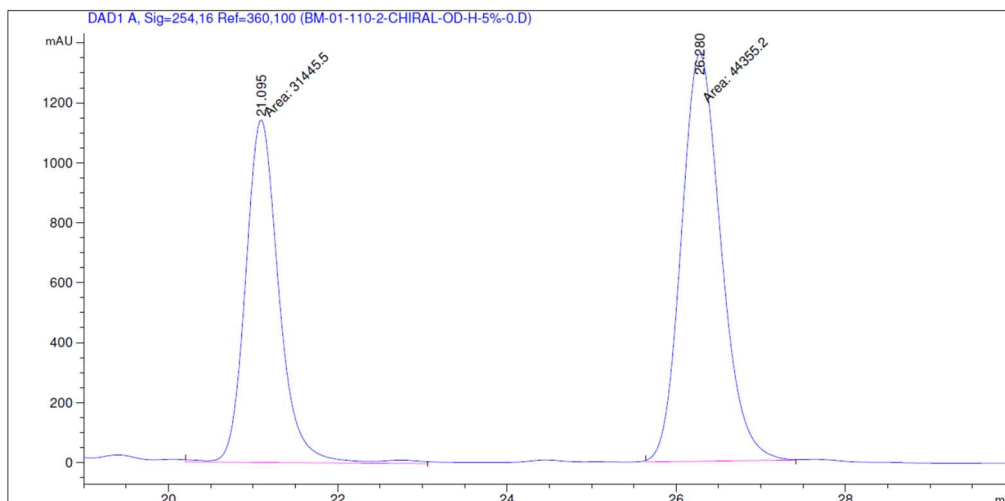

| Peak # | RetTime [min] | Type | Width [min] | Area [mAU*s] | Height [mAU] | Area %  |
|--------|---------------|------|-------------|--------------|--------------|---------|
| 1      | 21.095        | MM   | 0.4585      | 3.14455e4    | 1142.96802   | 41.4845 |
| 2      | 26.280        | MM   | 0.5436      | 4.43552e4    | 1359.90491   | 58.5155 |

Totals : 7.58008e4 2502.87292

**Chiral: (S,E)-N-(7-methyl-3-methyleneocta-4,6-dien-2-yl)aniline (3w) (39% ee)**

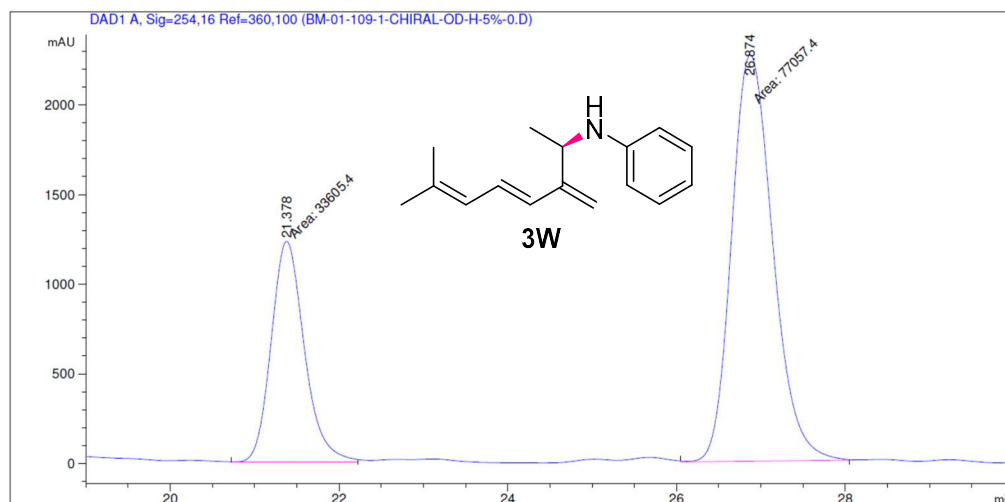

| Peak # | RetTime [min] | Type | Width [min] | Area [mAU*s] | Height [mAU] | Area %  |
|--------|---------------|------|-------------|--------------|--------------|---------|
| 1      | 21.378        | MM   | 0.4549      | 3.36054e4    | 1231.21655   | 30.3674 |
| 2      | 26.874        | MM   | 0.5666      | 7.70574e4    | 2266.49707   | 69.6326 |

Totals : 1.10663e5 3497.71362

## 10. $^1\text{H}$ and $^{13}\text{C}$ NMR Spectra of the Products

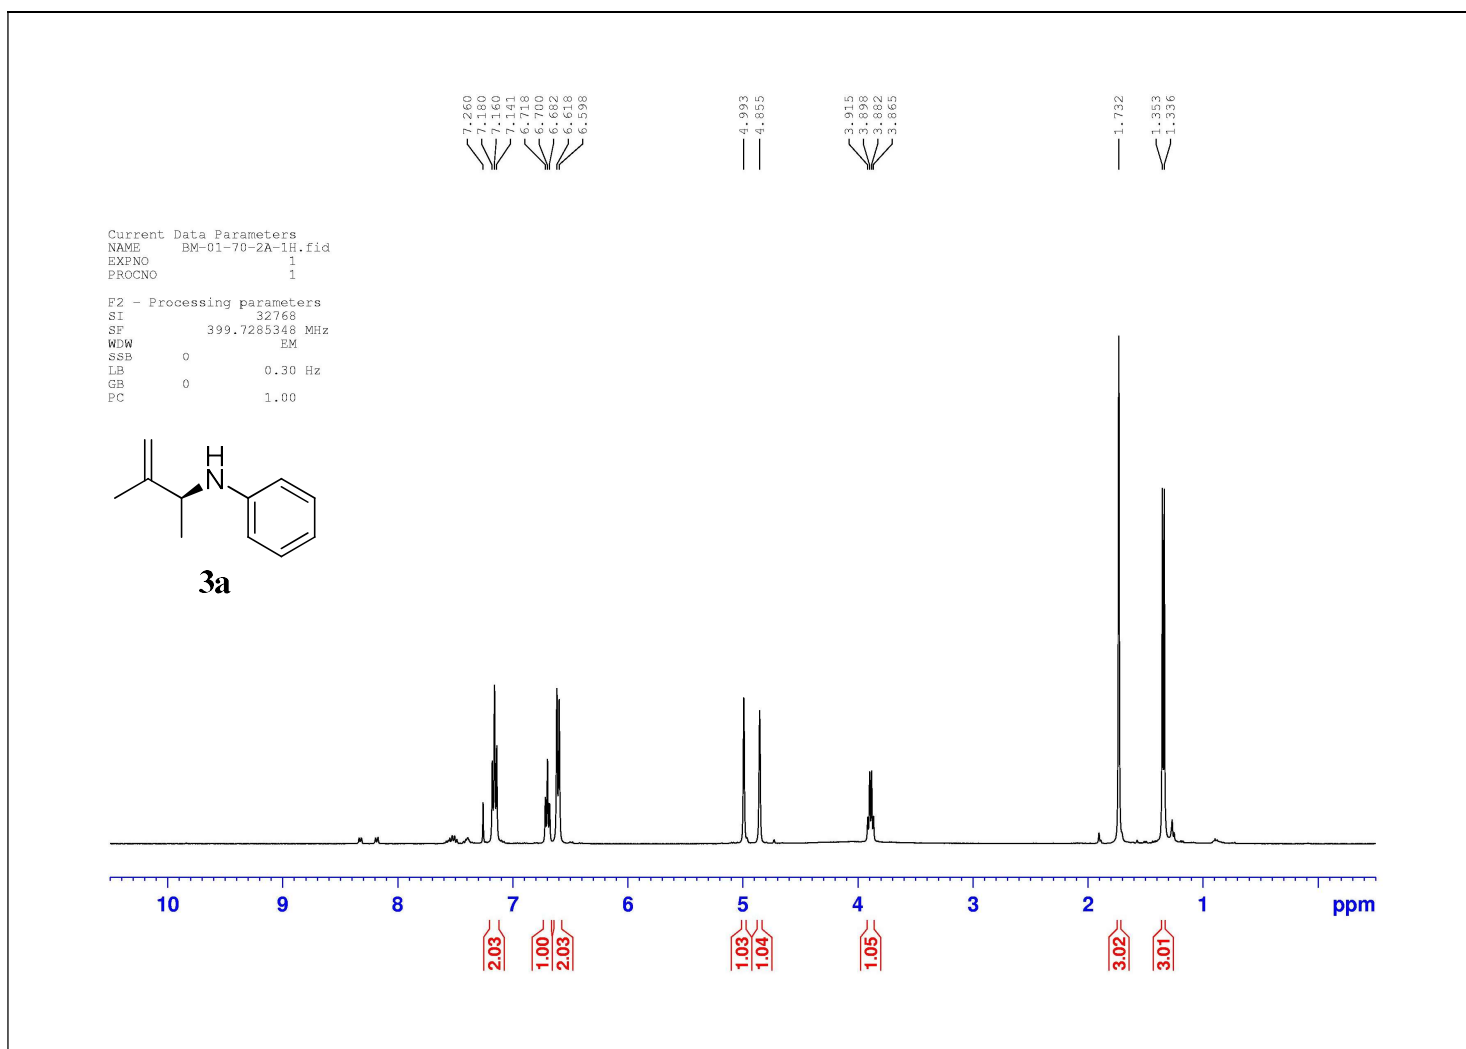

$^1\text{H}$  Spectra of **3a** in  $\text{CDCl}_3$ .

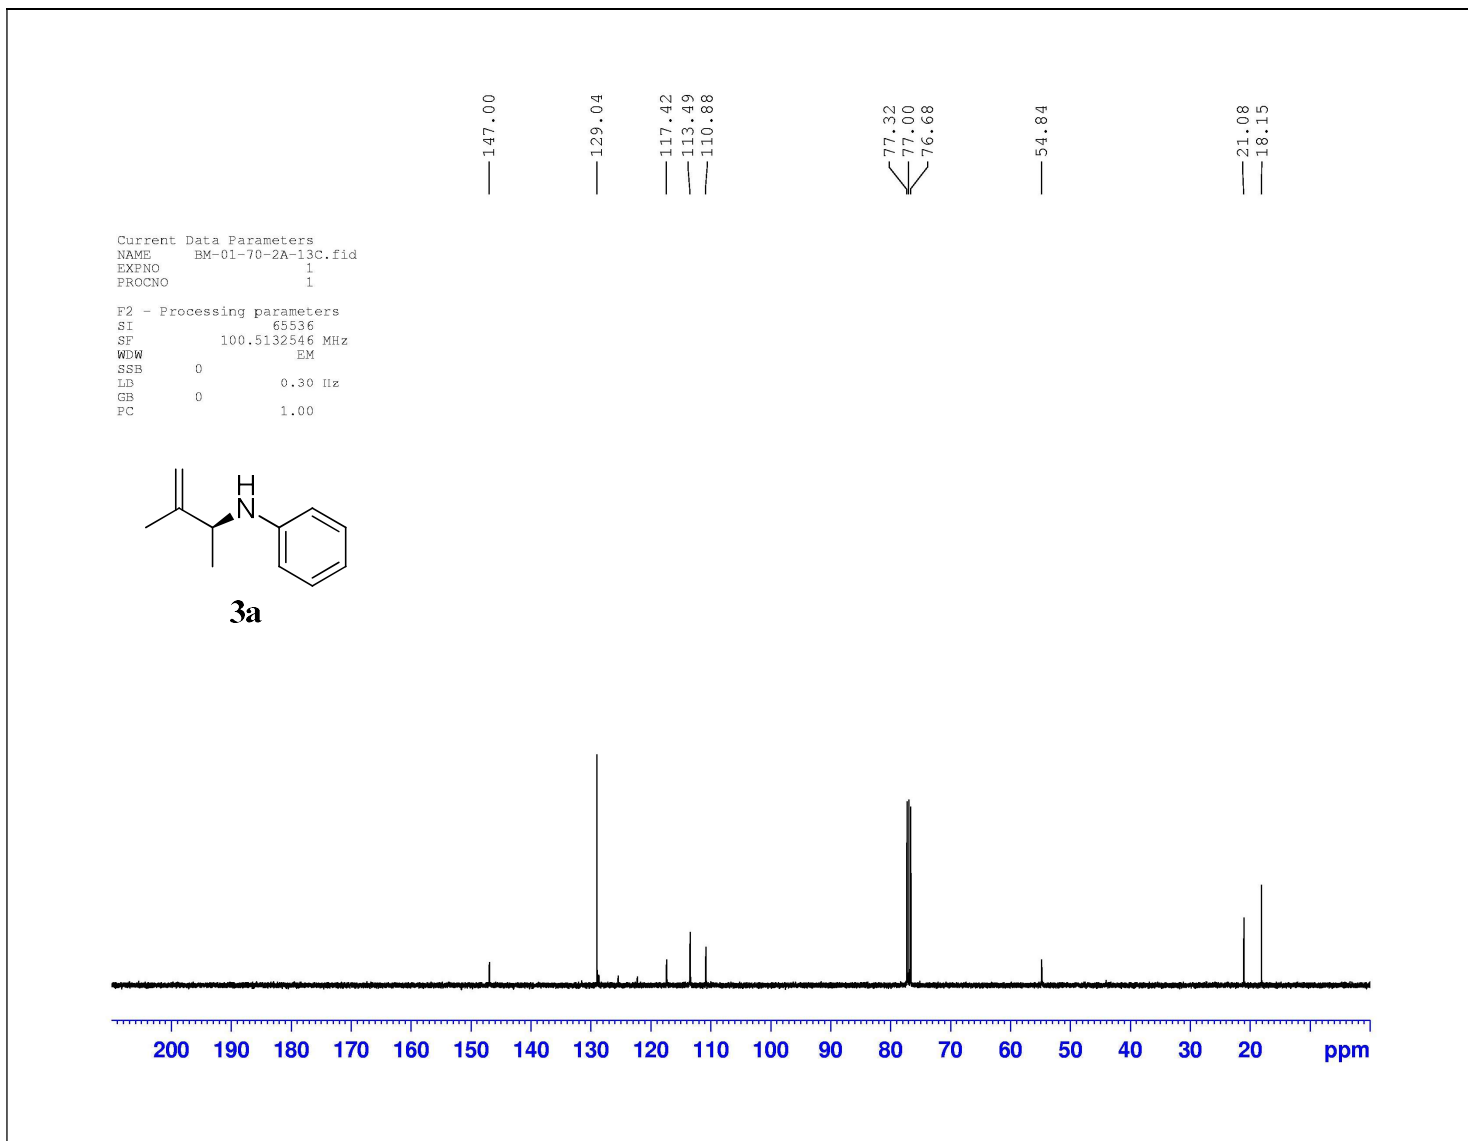

$^{13}\text{C}$  NMR Spectra of **3a** in  $\text{CDCl}_3$ .

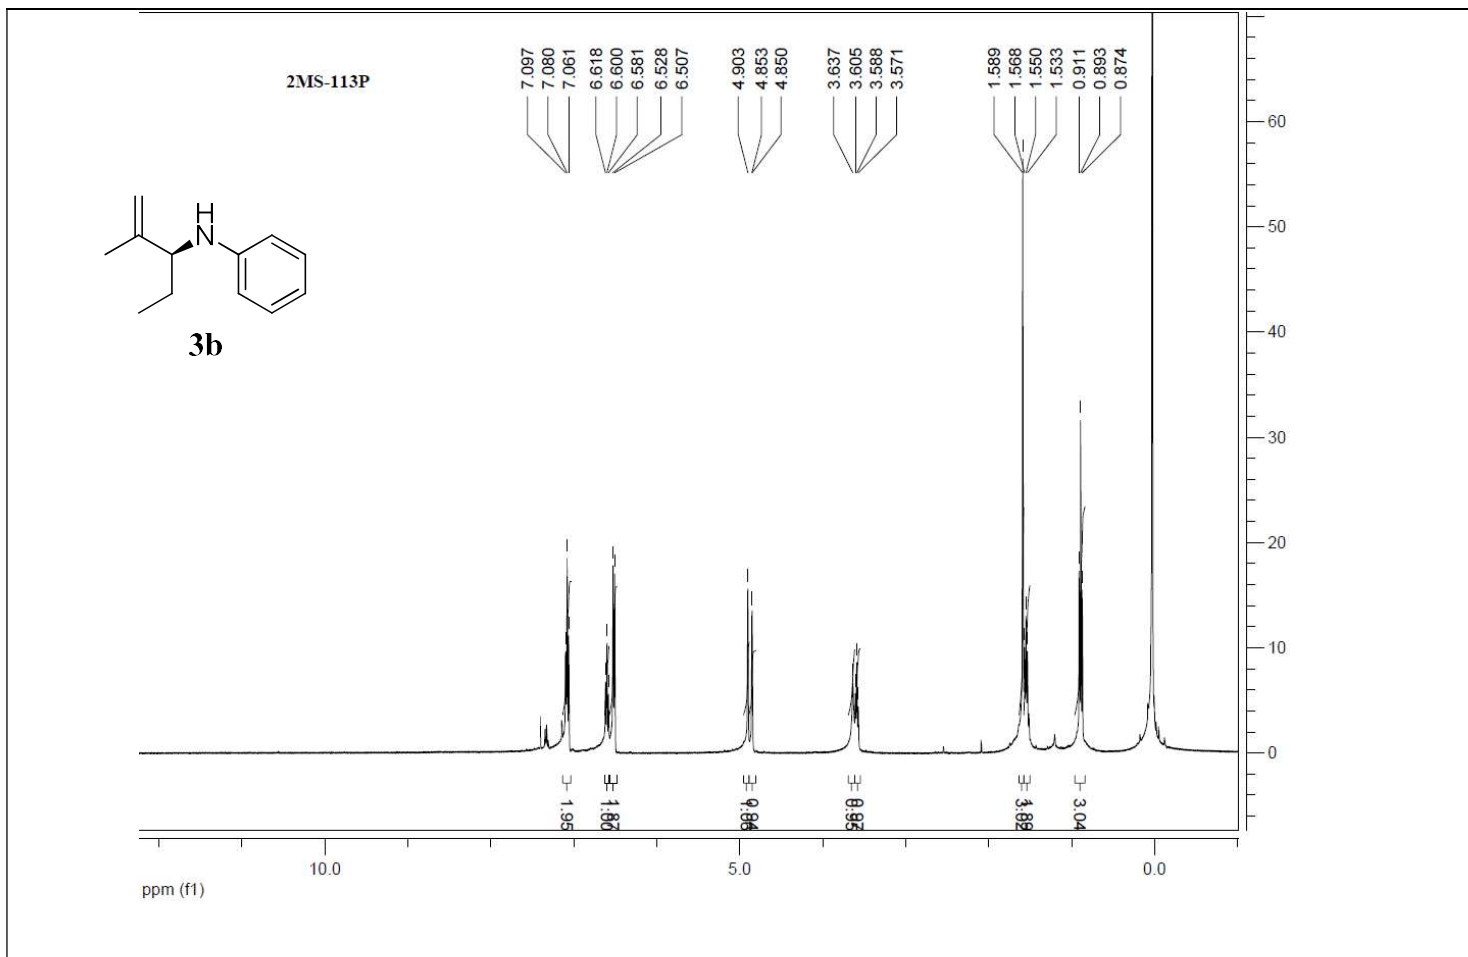

$^1\text{H}$  Spectra of **3b** in  $\text{CDCl}_3$ .

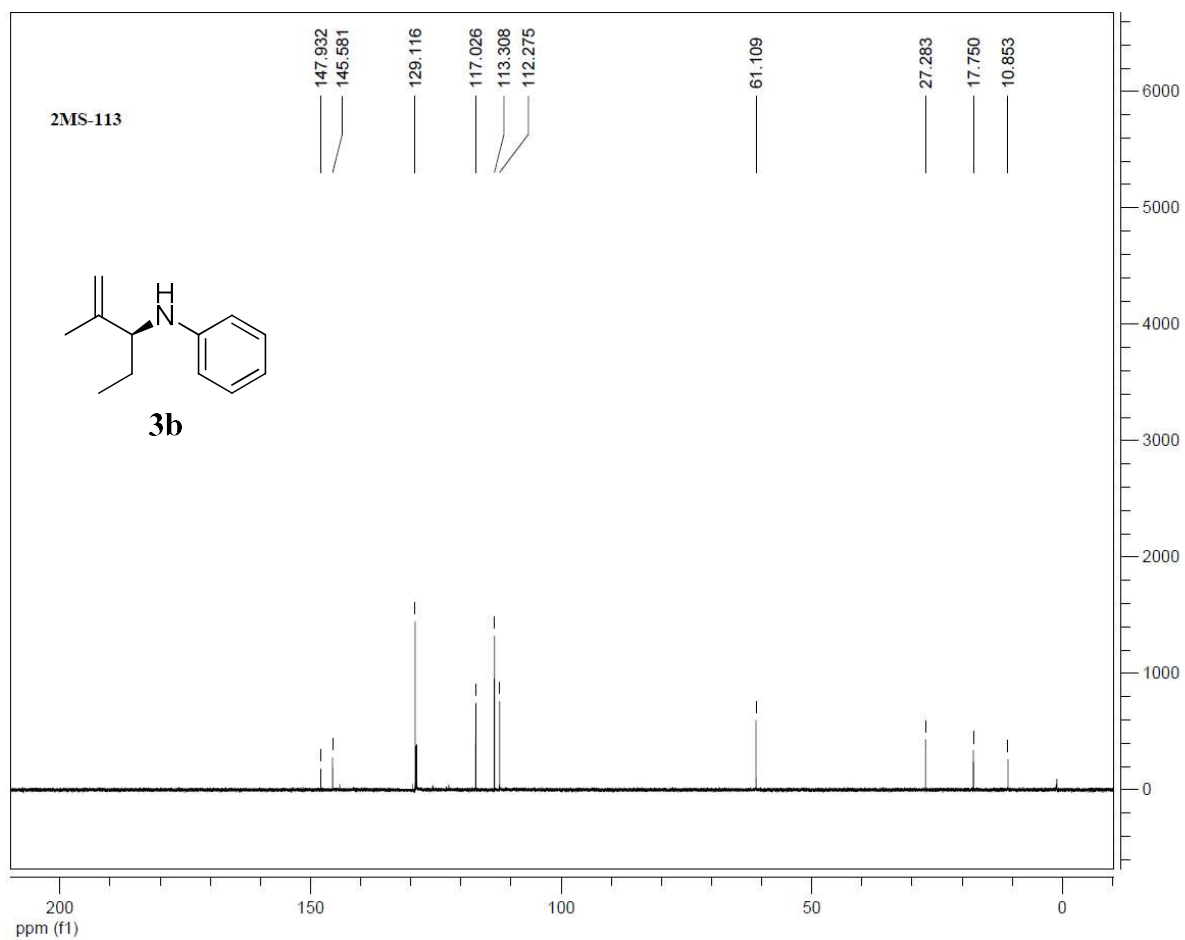

$^{13}\text{C}$  NMR Spectra of **3b** in  $\text{CDCl}_3$ .



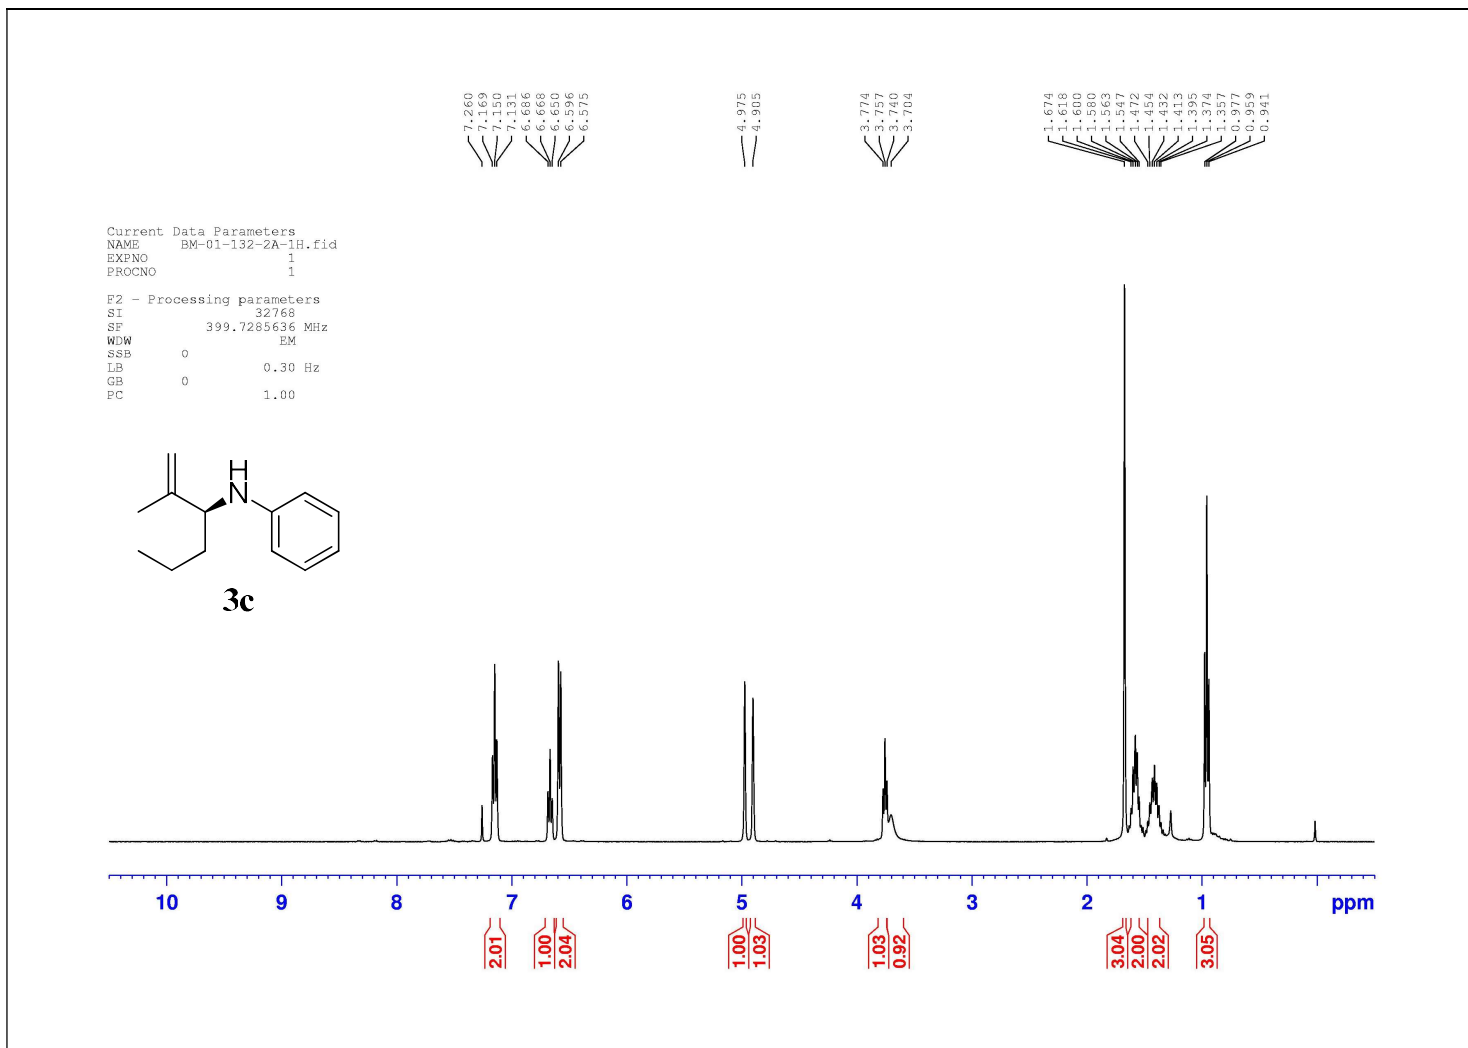

$^1\text{H}$  Spectra of **3c** in  $\text{CDCl}_3$ .

Current Data Parameters  
NAME BM-01-132-2A-13C-3.fid  
EXPNO 1  
PROCNO 1  
F2 - Processing parameters  
SI 65536  
SF 100.5133142 MHz  
WDW EM  
SSB 0  
LB 0.30 Hz  
GR 0  
PC 1.00

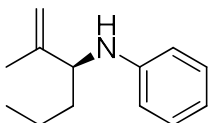

**3c**

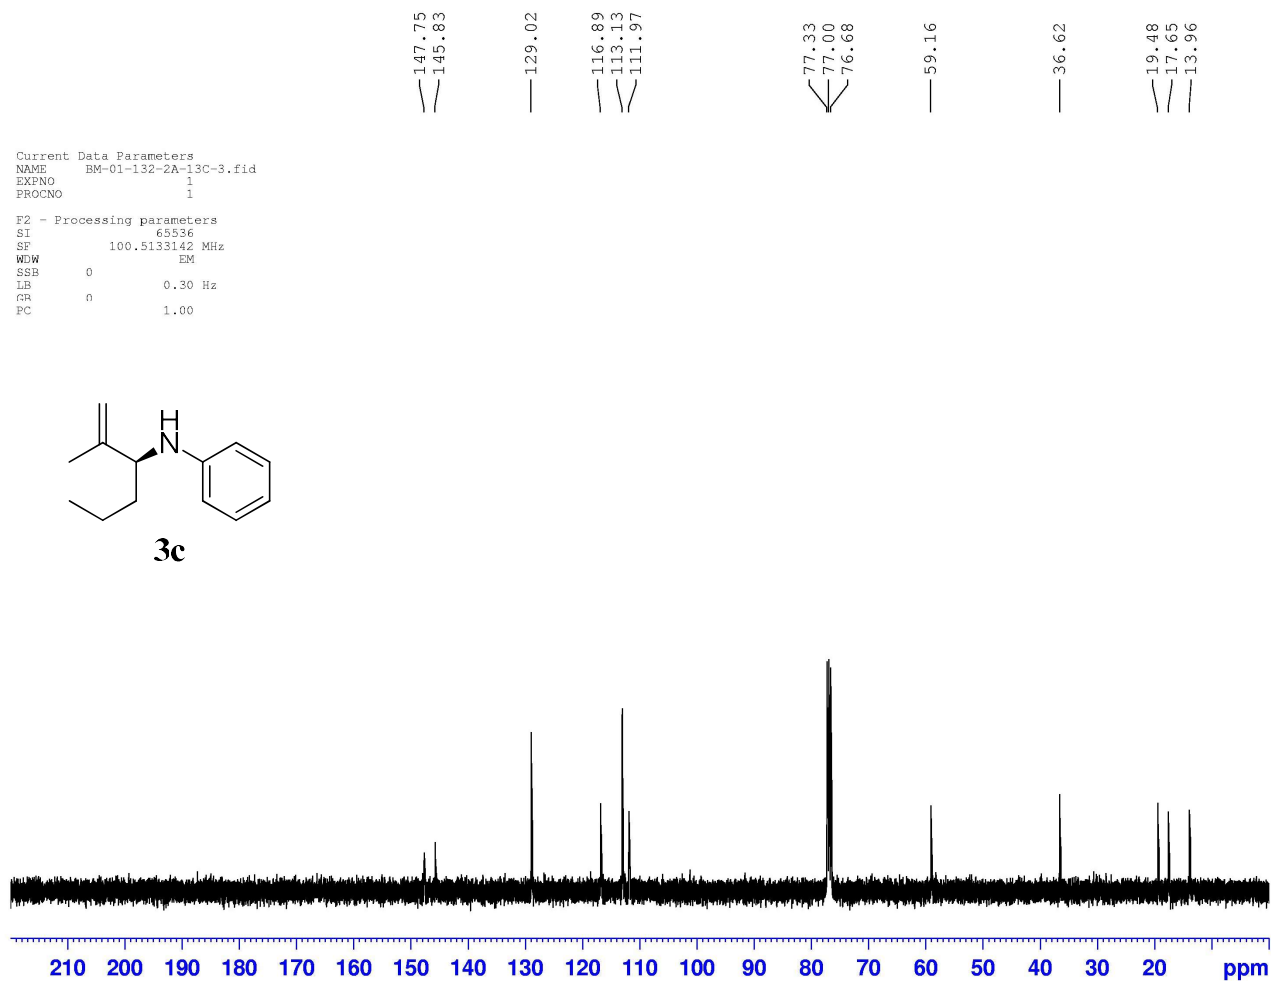

<sup>13</sup>C NMR Spectra of **3c** in CDCl<sub>3</sub>.

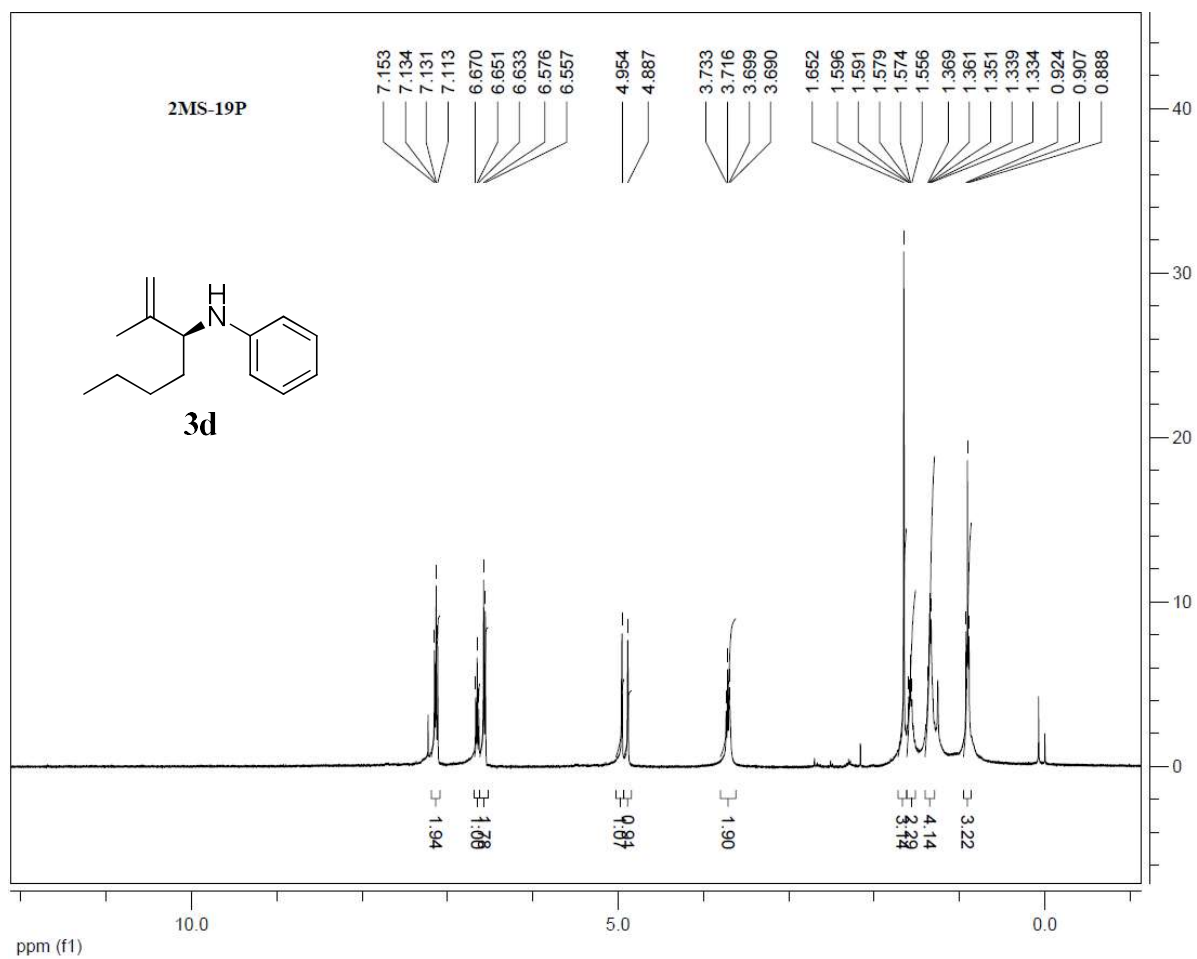

$^1\text{H}$  Spectra of **3d** in  $\text{CDCl}_3$ .

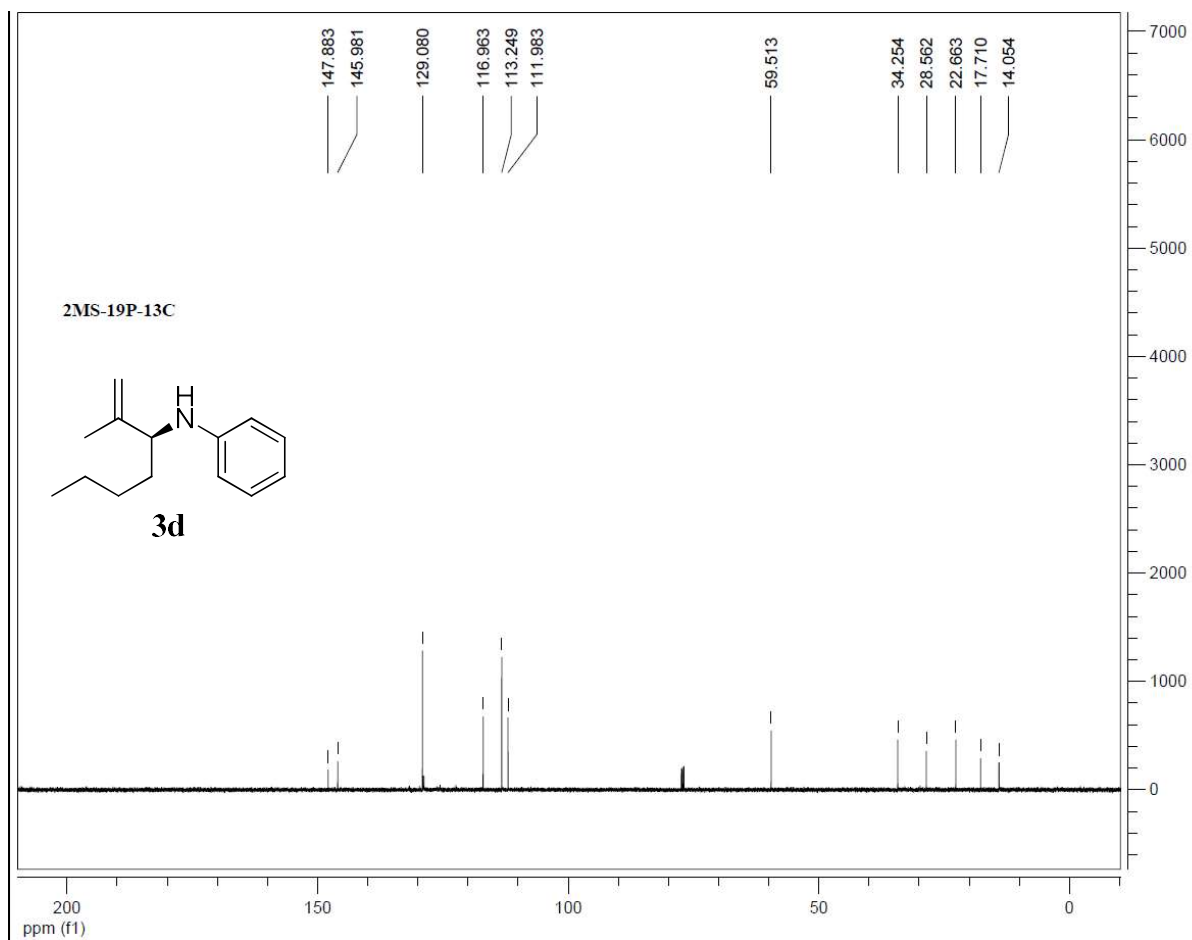

$^{13}\text{C}$  NMR Spectra of **3d** in  $\text{CDCl}_3$ .

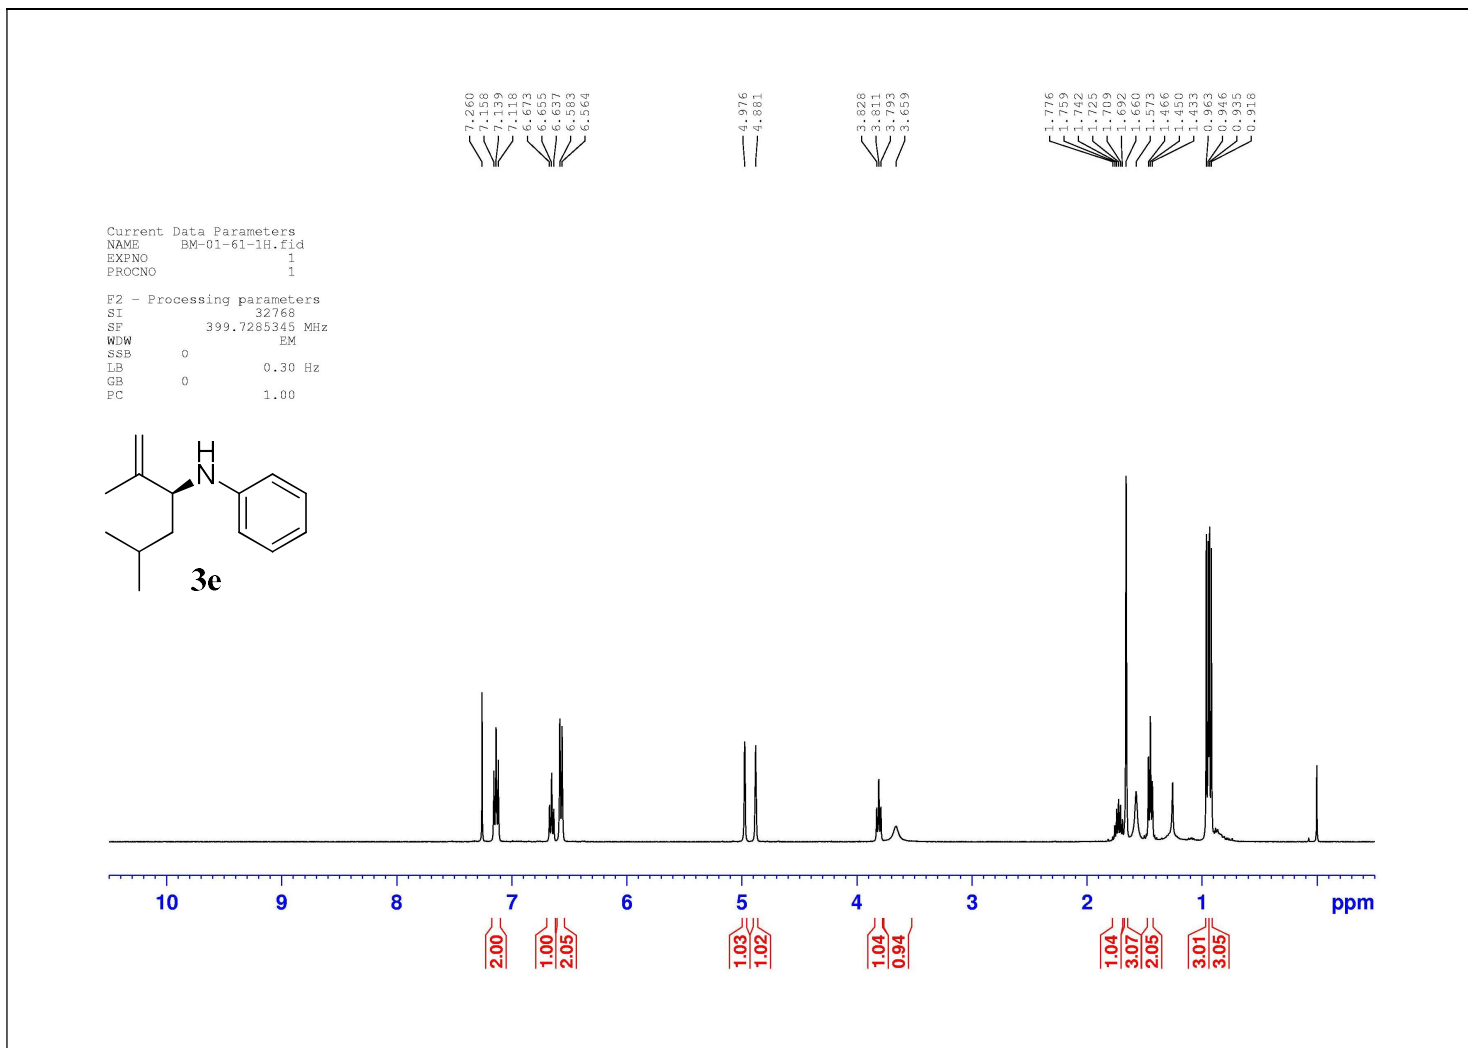

<sup>1</sup>H Spectra of **3e** in CDCl<sub>3</sub>.

Current Data Parameters  
NAME RM-01-61-130.fid  
EXPNO 1  
PROCNO 1

F2 - Processing parameters  
SI 65536  
SF 100.5132522 MHz  
WDW EM  
SSB 0  
LB 0.30 Hz  
GB 0  
PC 1.00

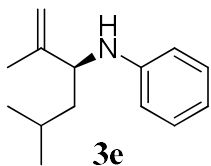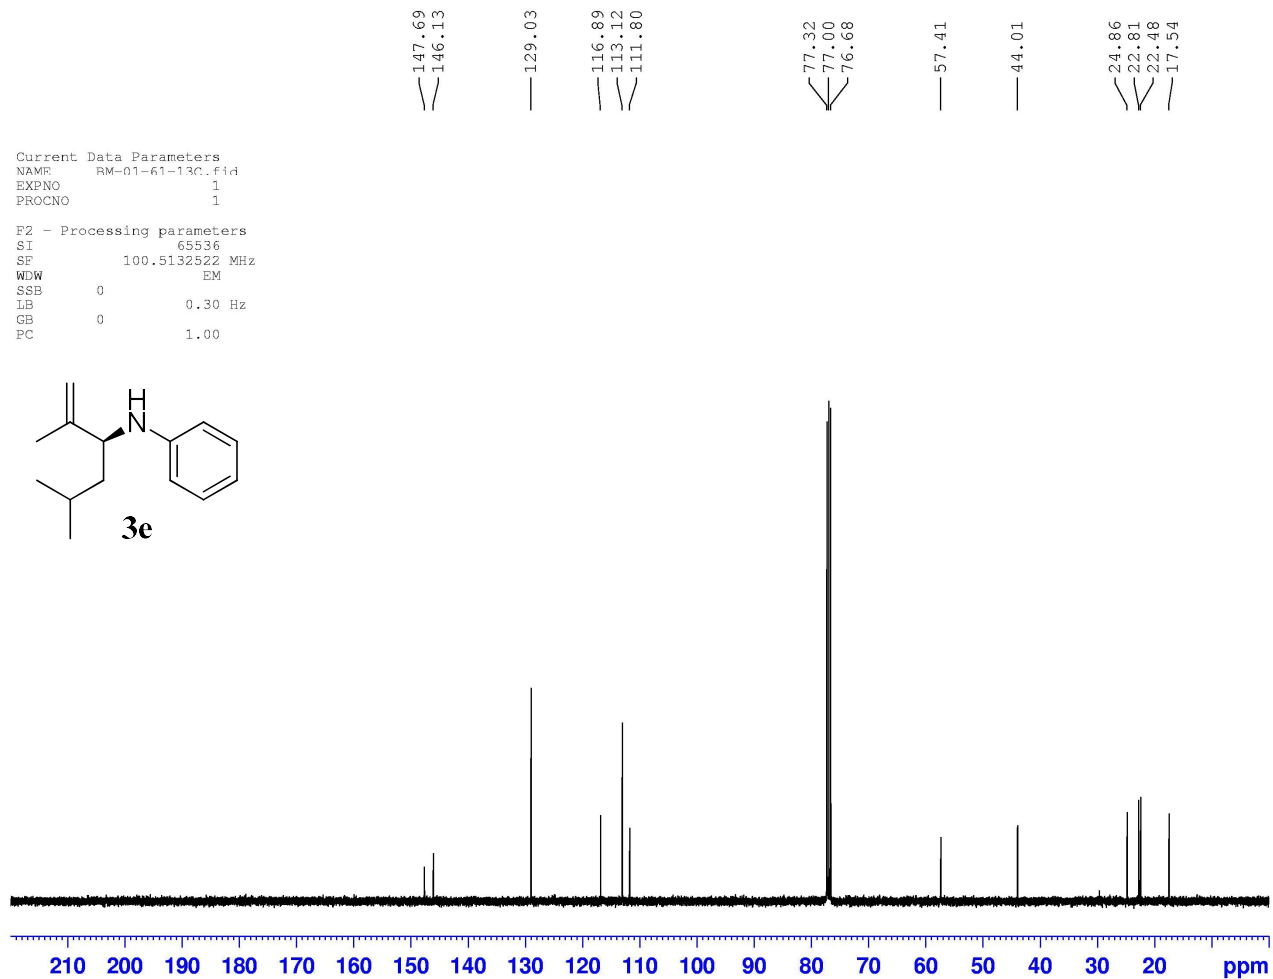

$^{13}\text{C}$  NMR Spectra of **3e** in  $\text{CDCl}_3$ .

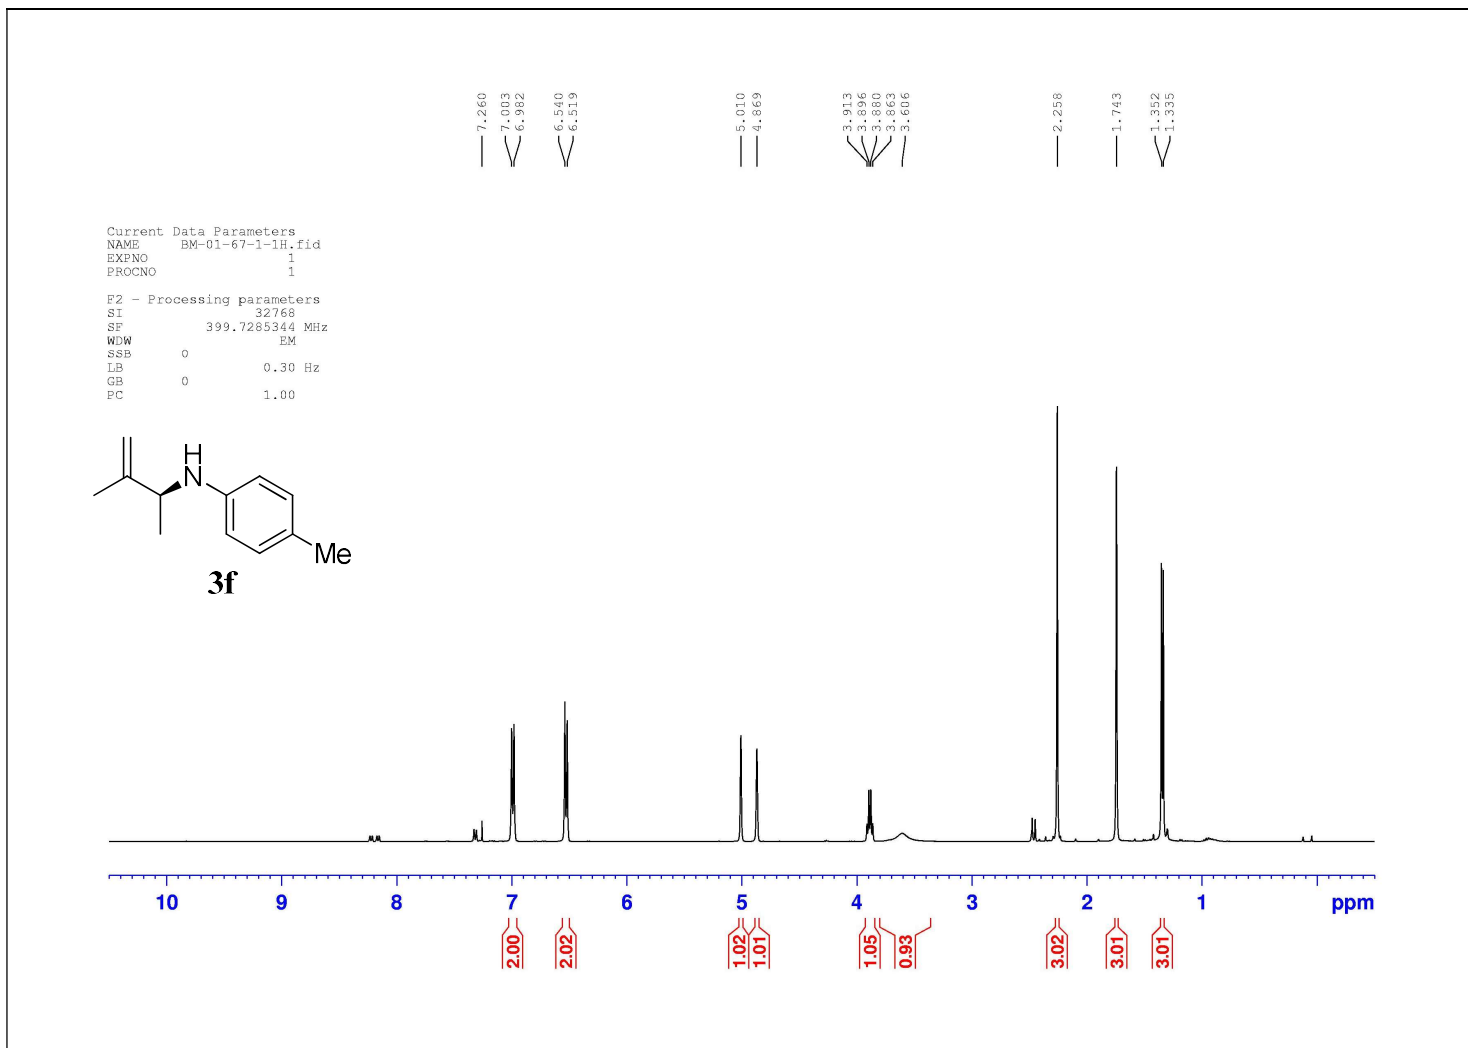

$^1\text{H}$  Spectra of **3f** in  $\text{CDCl}_3$ .

Current Data Parameters  
NAME RM-01-67-1-130.fid  
EXPNO 1  
PROCNO 1

F2 - Processing parameters  
SI 65536  
SF 100.5132588 MHz  
WDW EM  
SSB 0  
LB 0.30 Hz  
GB 0  
PC 1.00

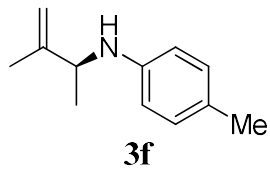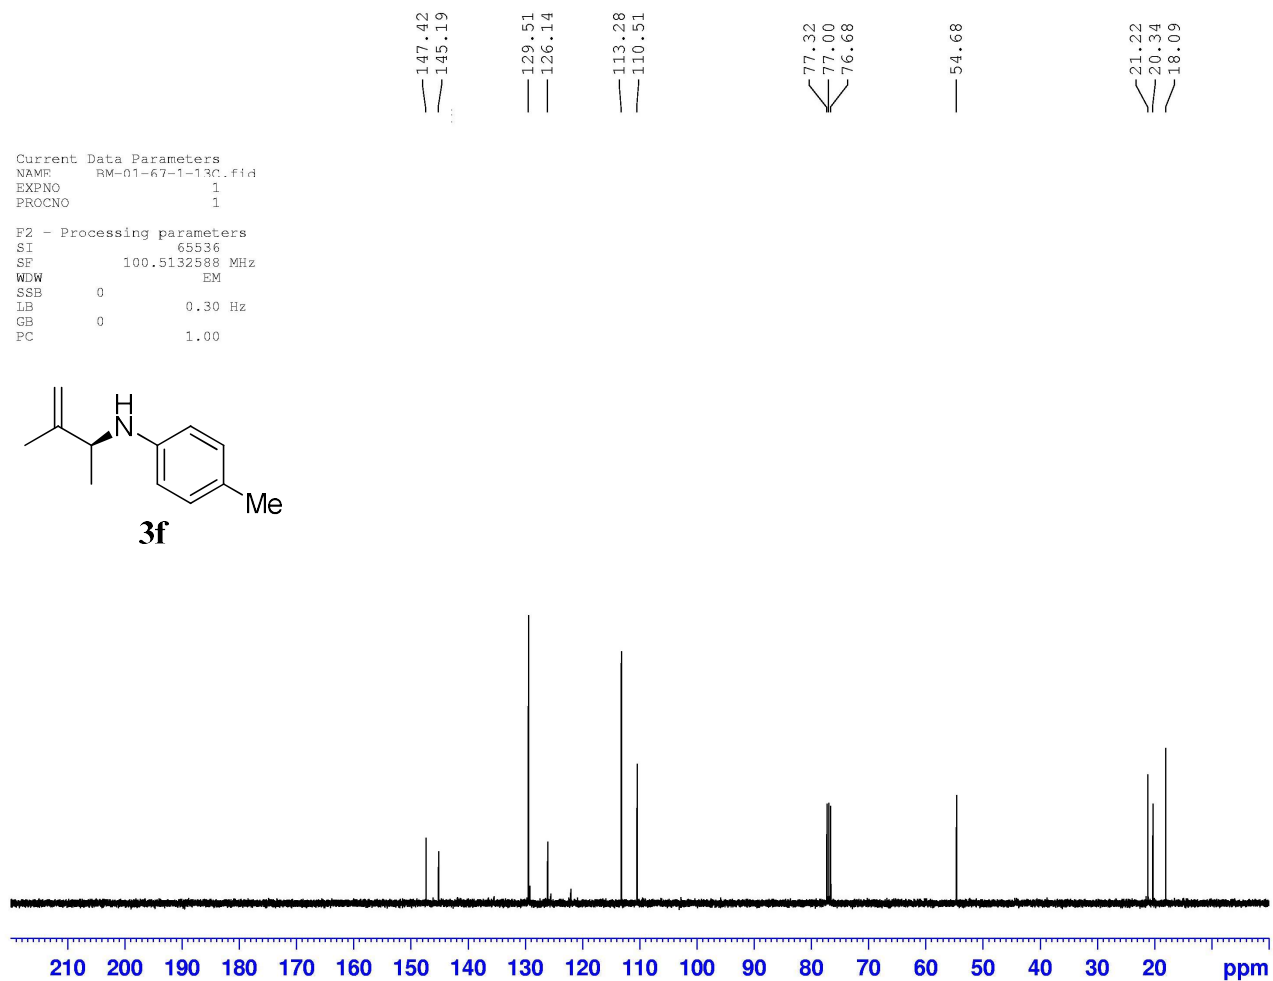

$^{13}\text{C}$  NMR Spectra of **3f** in  $\text{CDCl}_3$ .



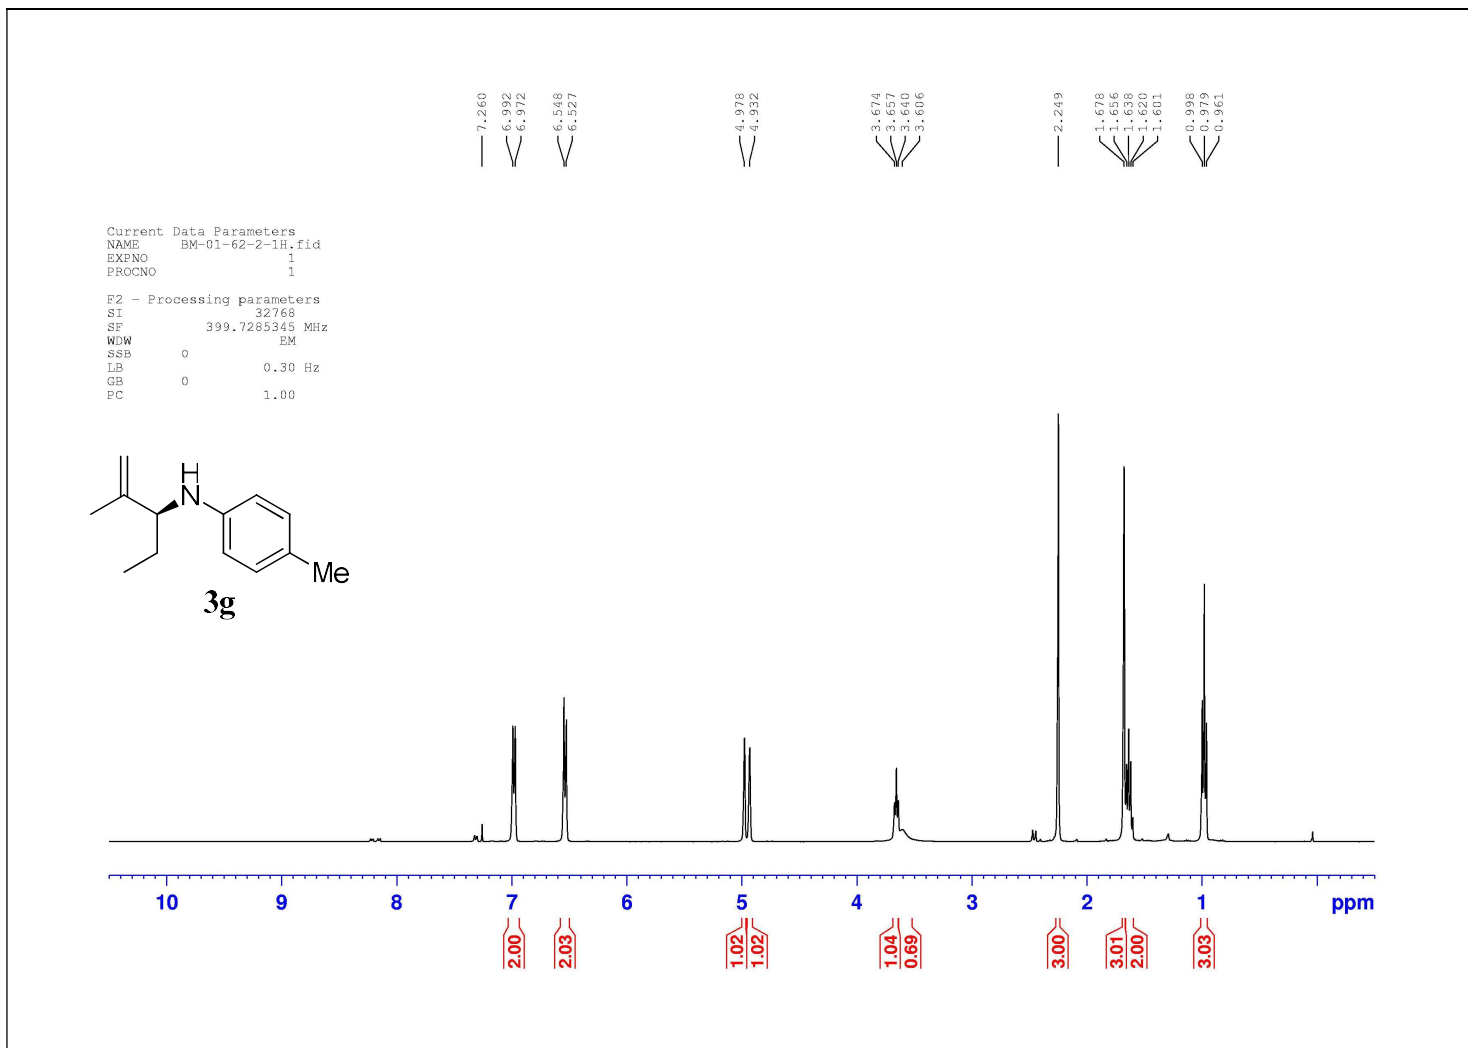

$^1\text{H}$  Spectra of **3g** in  $\text{CDCl}_3$ .

Current Data Parameters  
NAME RM-01-62-2-130.fid  
EXPNO 1  
PROCNO 1

F2 - Processing parameters  
SI 65536  
SF 100.5132573 MHz  
WDW EM  
SSB 0  
LB 0.30 Hz  
GB 0  
PC 1.00

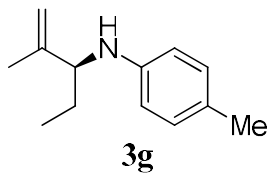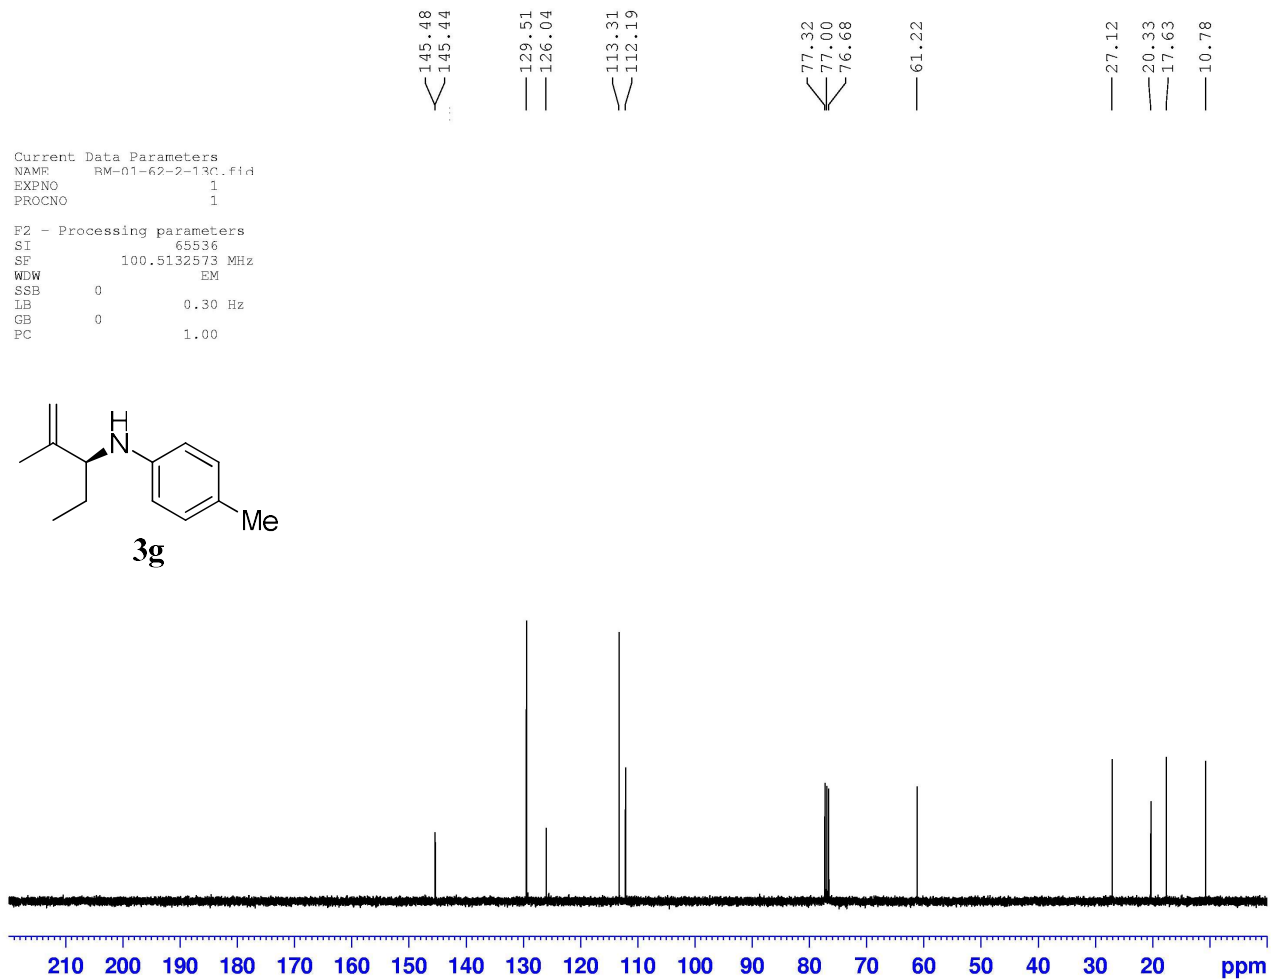

<sup>13</sup>C NMR Spectra of **3g** in CDCl<sub>3</sub>.

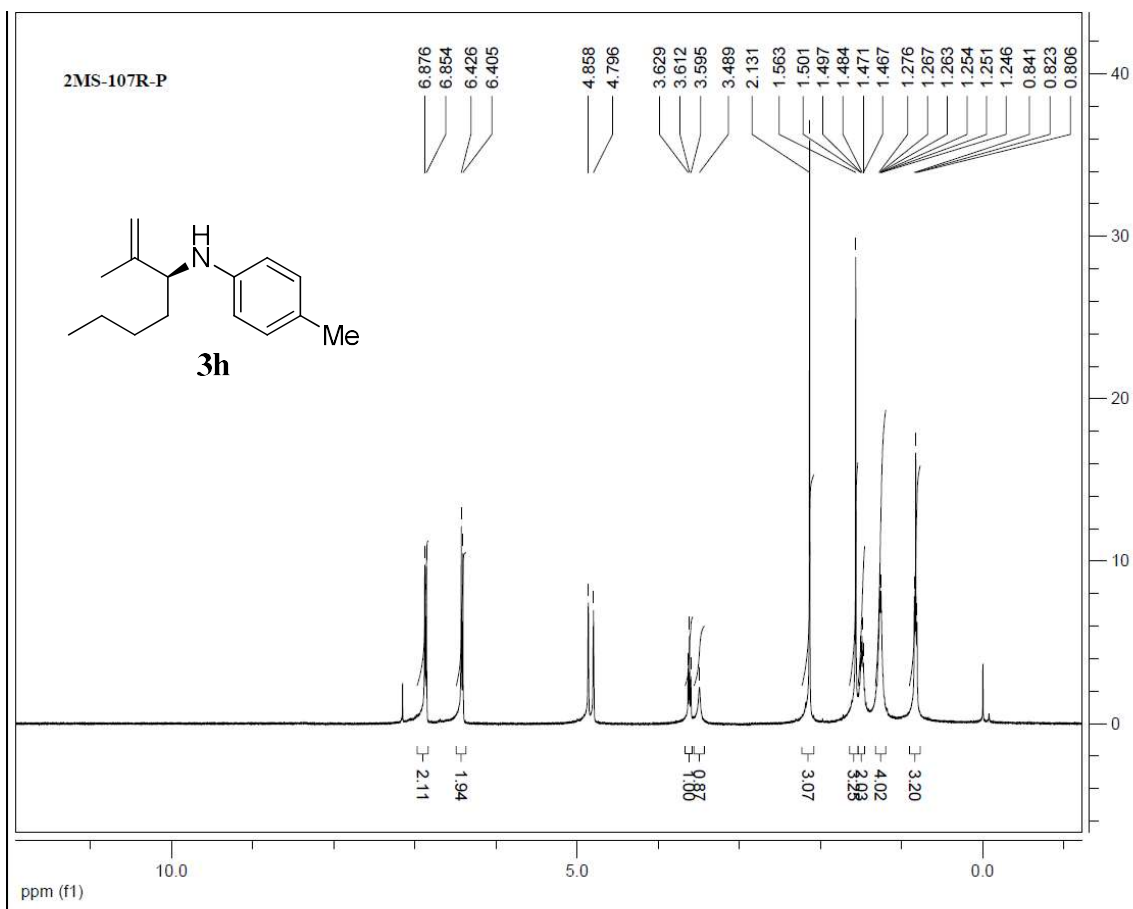

$^1\text{H}$  Spectra of **3h** in  $\text{CDCl}_3$ .

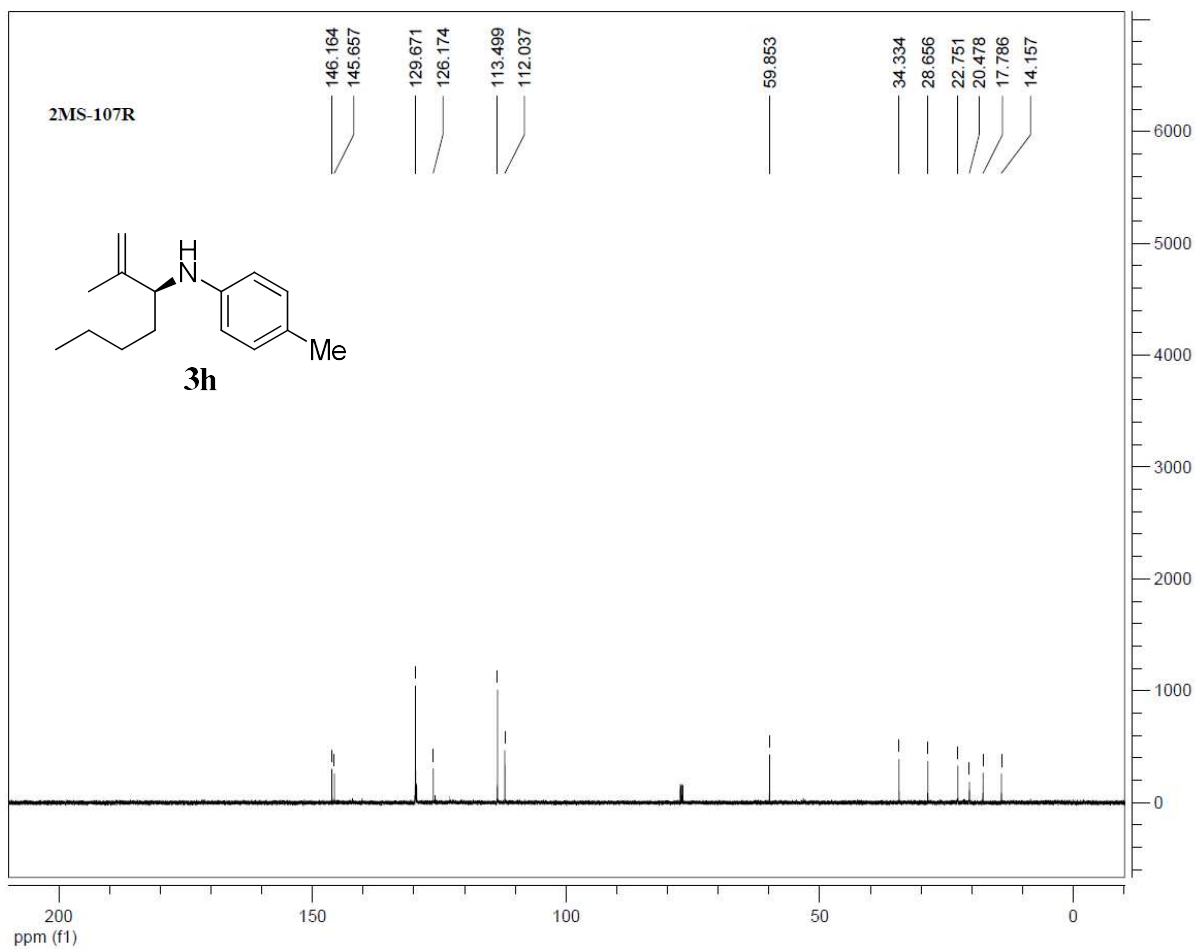

$^{13}\text{C}$  NMR Spectra of **3h** in  $\text{CDCl}_3$ .

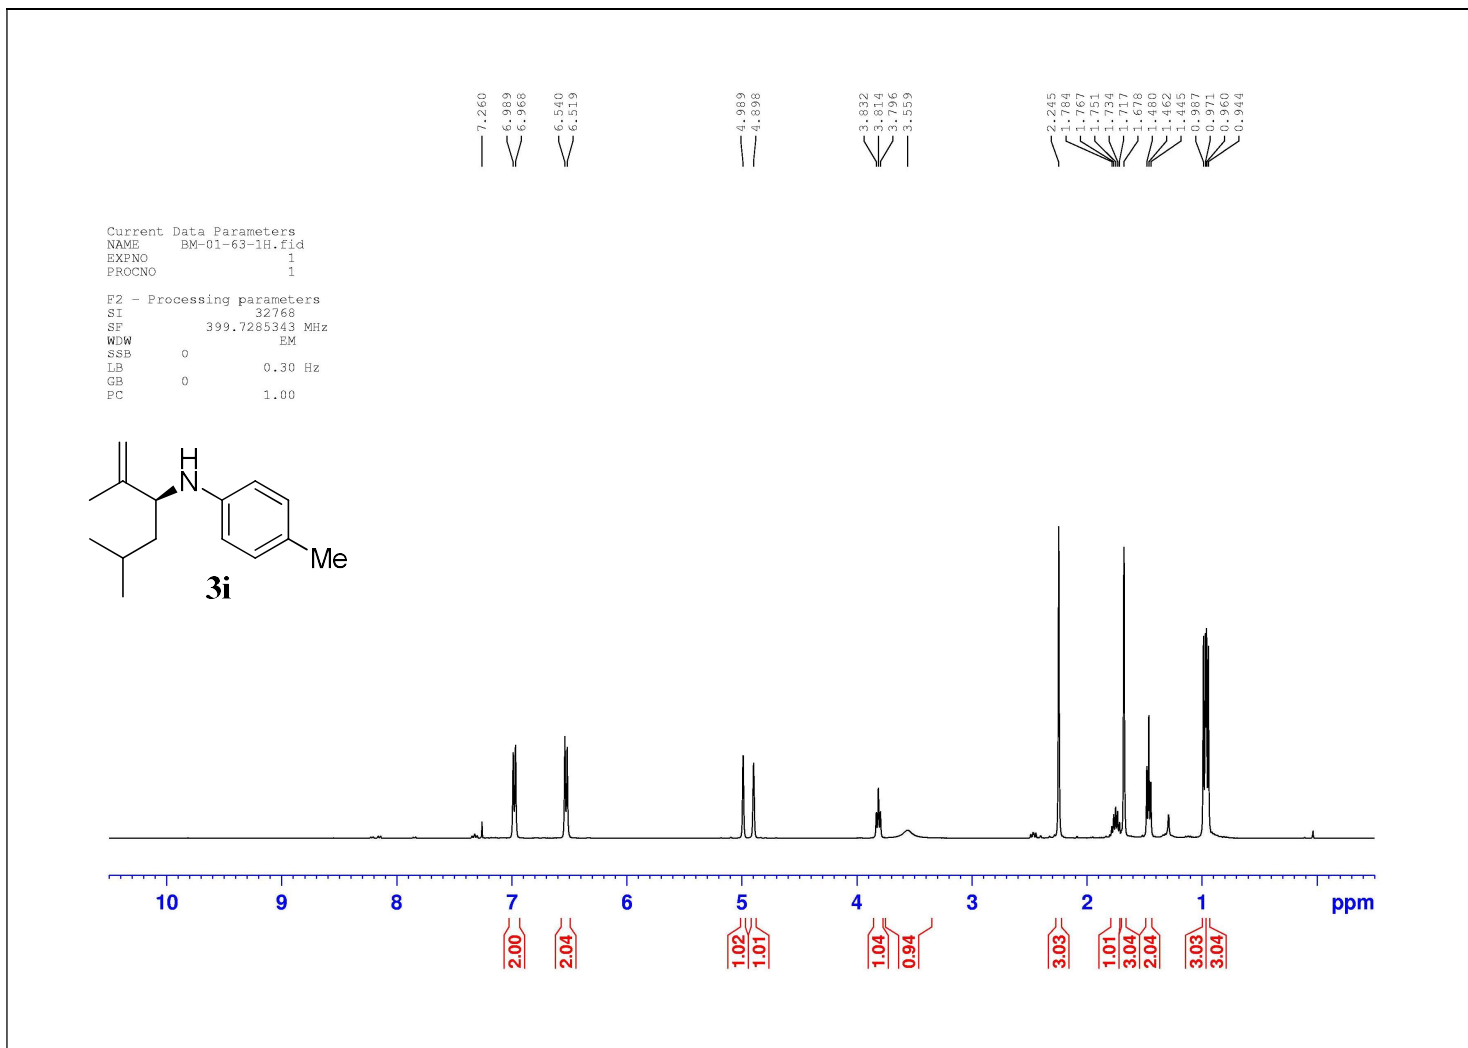

$^1\text{H}$  Spectra of **3i** in  $\text{CDCl}_3$ .

Current Data Parameters  
NAME RM-01-63-130.fid  
EXPNO 1  
PROCNO 1

F2 - Processing parameters  
SI 65536  
SF 100.5132564 MHz  
WDW EM  
SSB 0  
LB 0.30 Hz  
GB 0  
PC 1.00

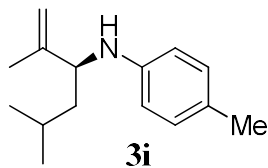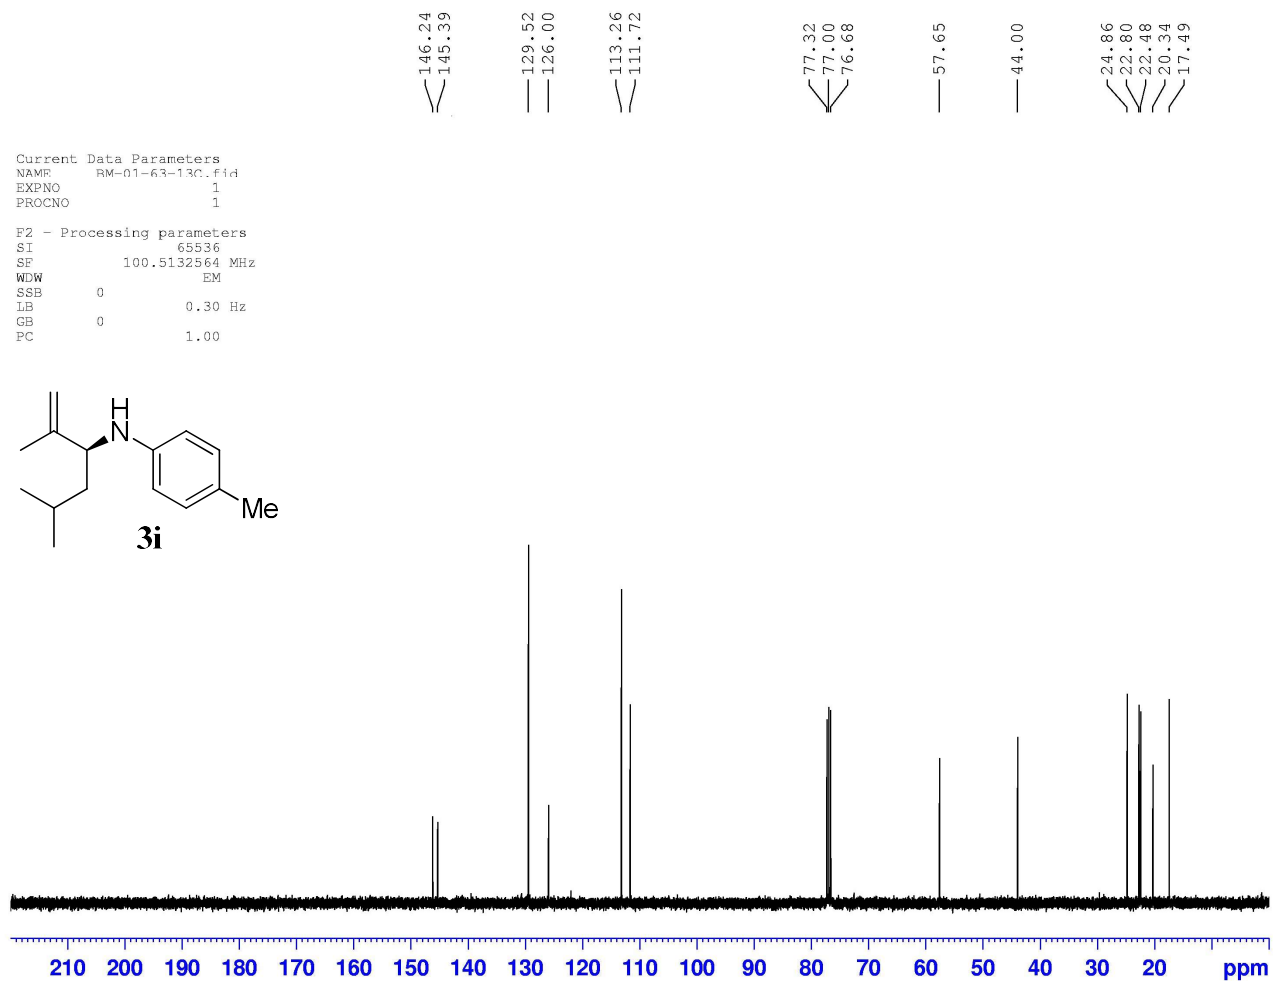

<sup>13</sup>C NMR Spectra of **3i** in CDCl<sub>3</sub>.

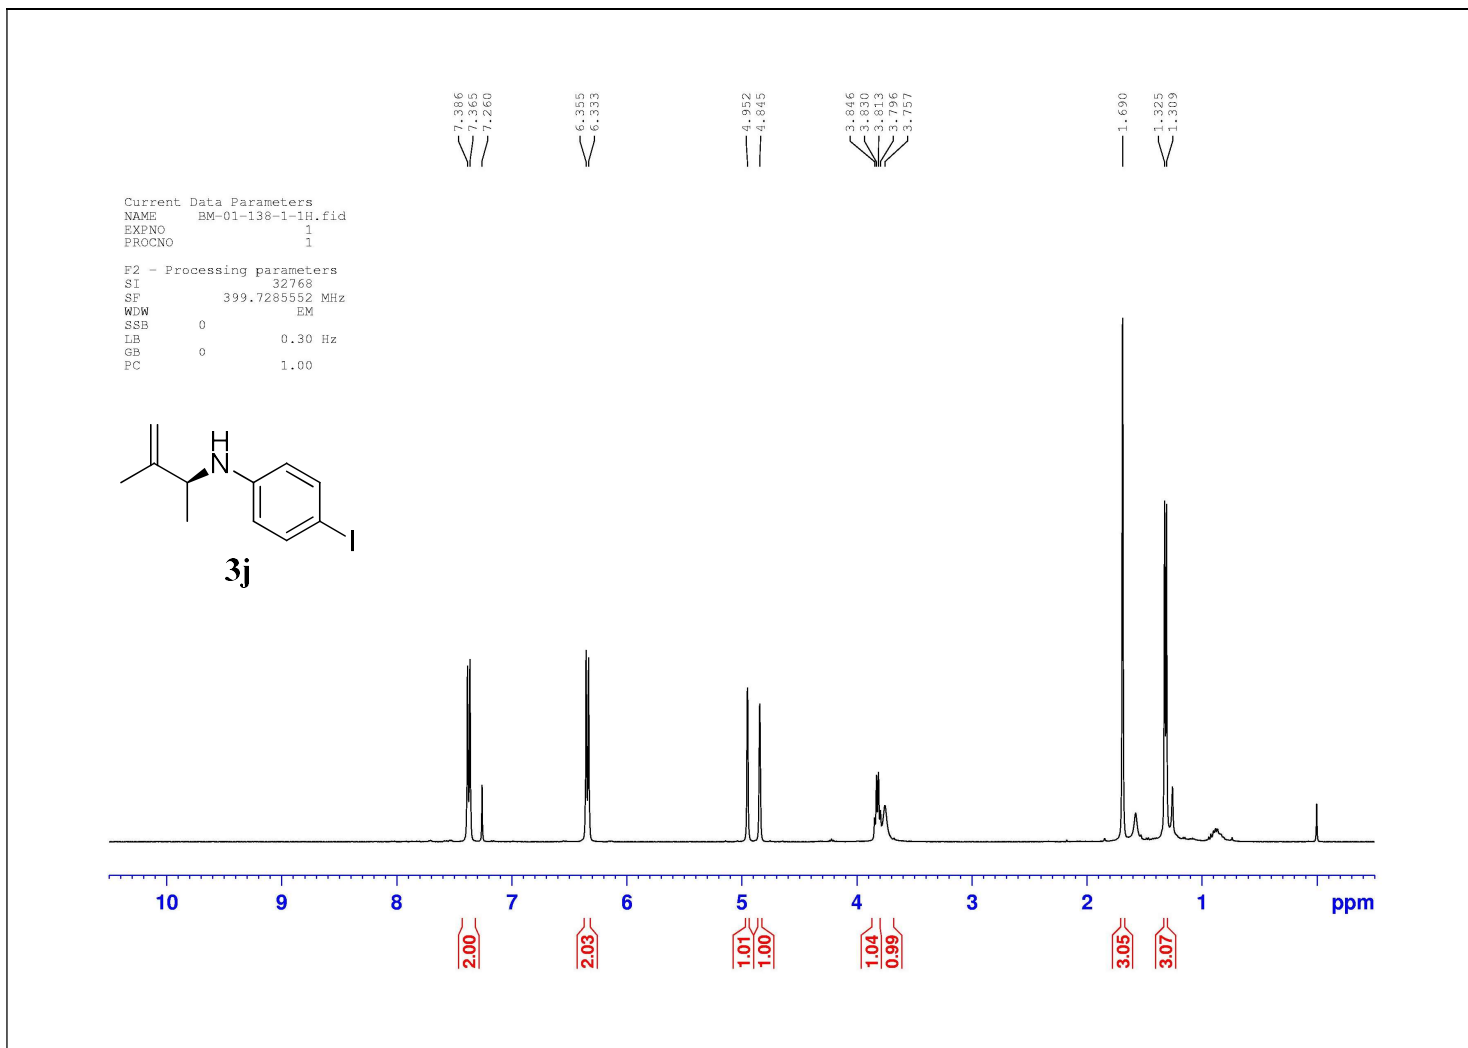

$^1\text{H}$  Spectra of **3j** in  $\text{CDCl}_3$ .

Current Data Parameters  
NAME BM-01-138-1-13C.fid  
EXPNO 1  
PROCNO 1

F2 - Processing parameters  
SI 65536  
SF 100.5133125 MHz  
WDW EM  
SSB 0  
LB 0.30 Hz  
GB 0  
PC 1.00

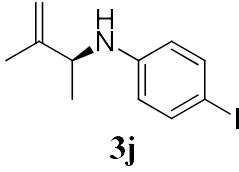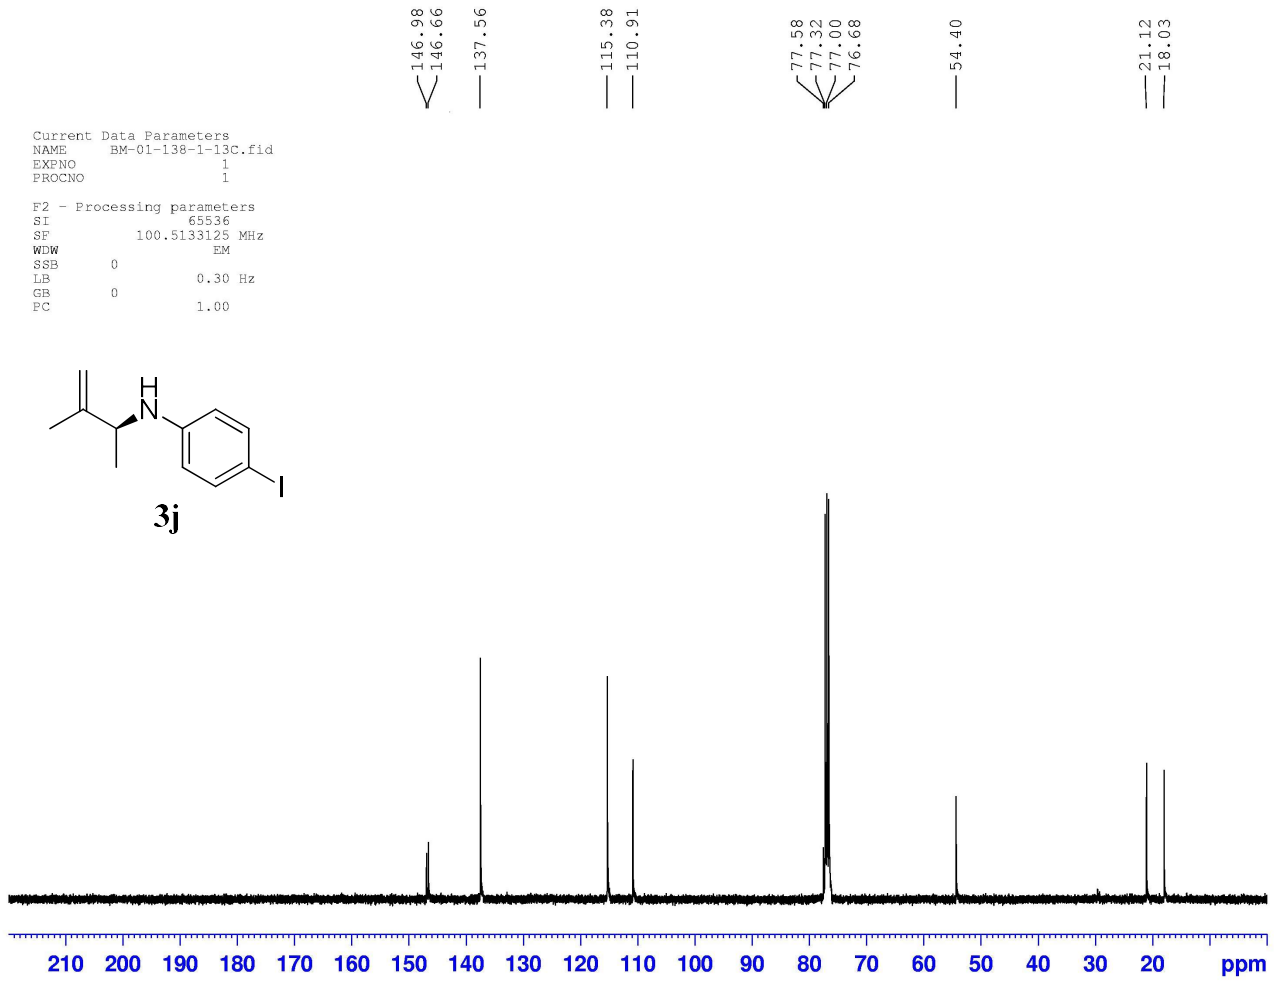

$^{13}\text{C}$  NMR Spectra of **3j** in  $\text{CDCl}_3$ .



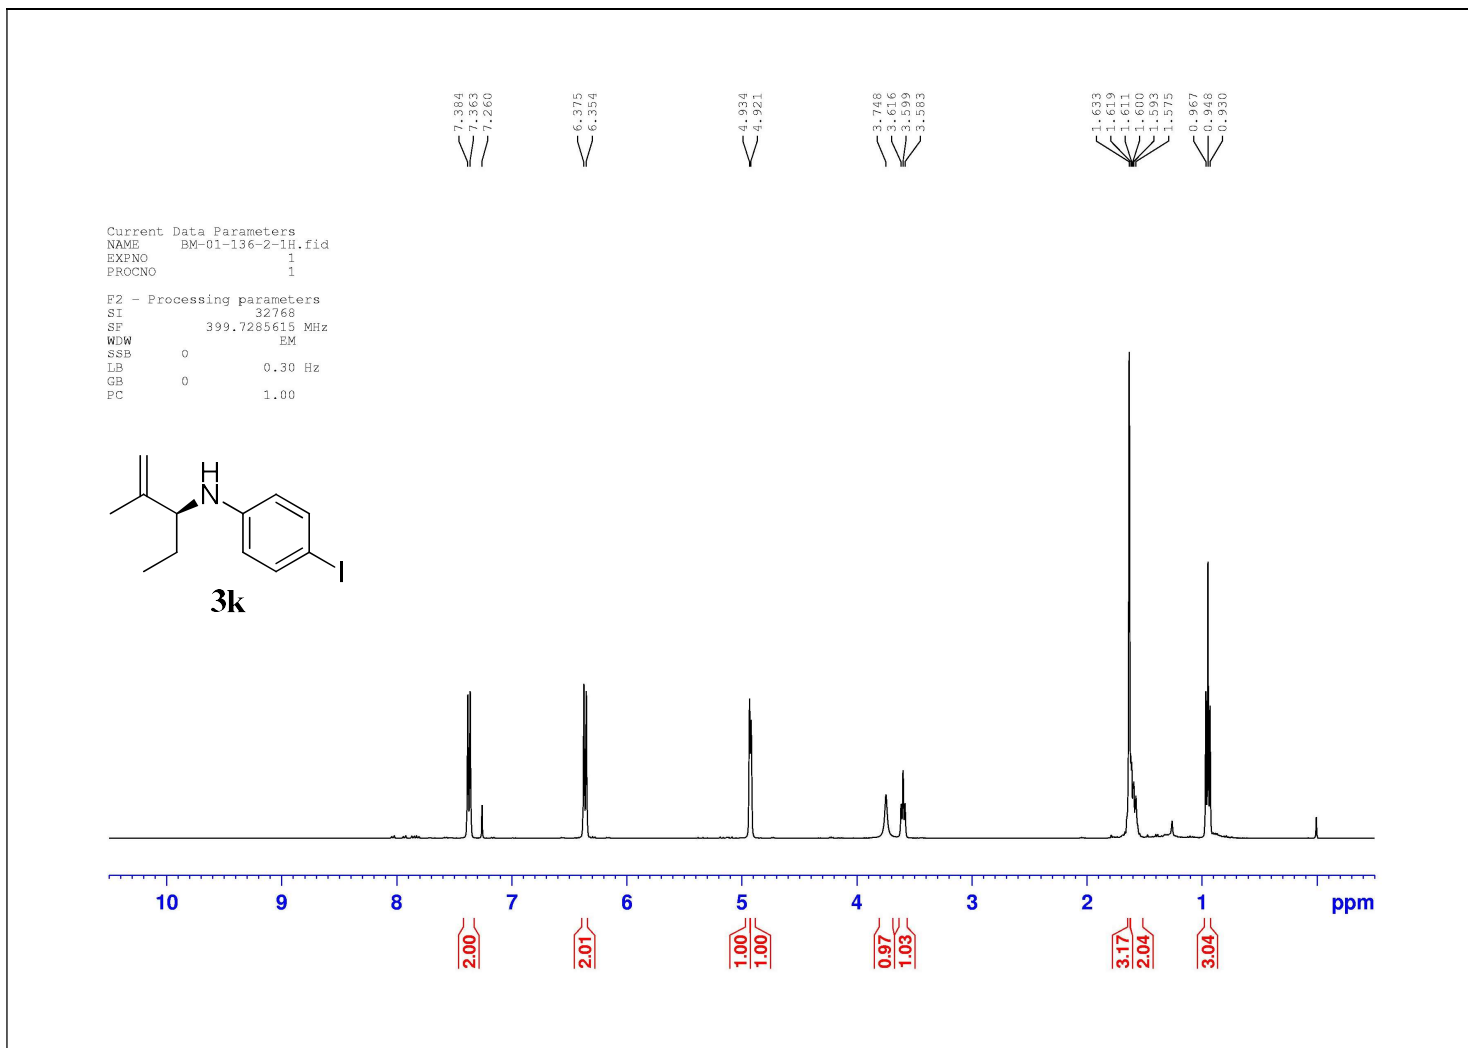

<sup>1</sup>H Spectra of **3k** in CDCl<sub>3</sub>.

Current Data Parameters  
NAME BM-01-136-2-13C.fid  
EXPNO 1  
PROCNO 1

F2 - Processing parameters  
SI 65536  
SF 100.5133172 MHz  
WDW EM  
SSB 0  
LD 0 0.30 Hz  
GB 0  
PC 1.00

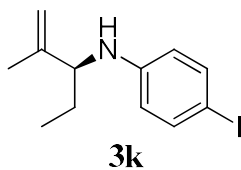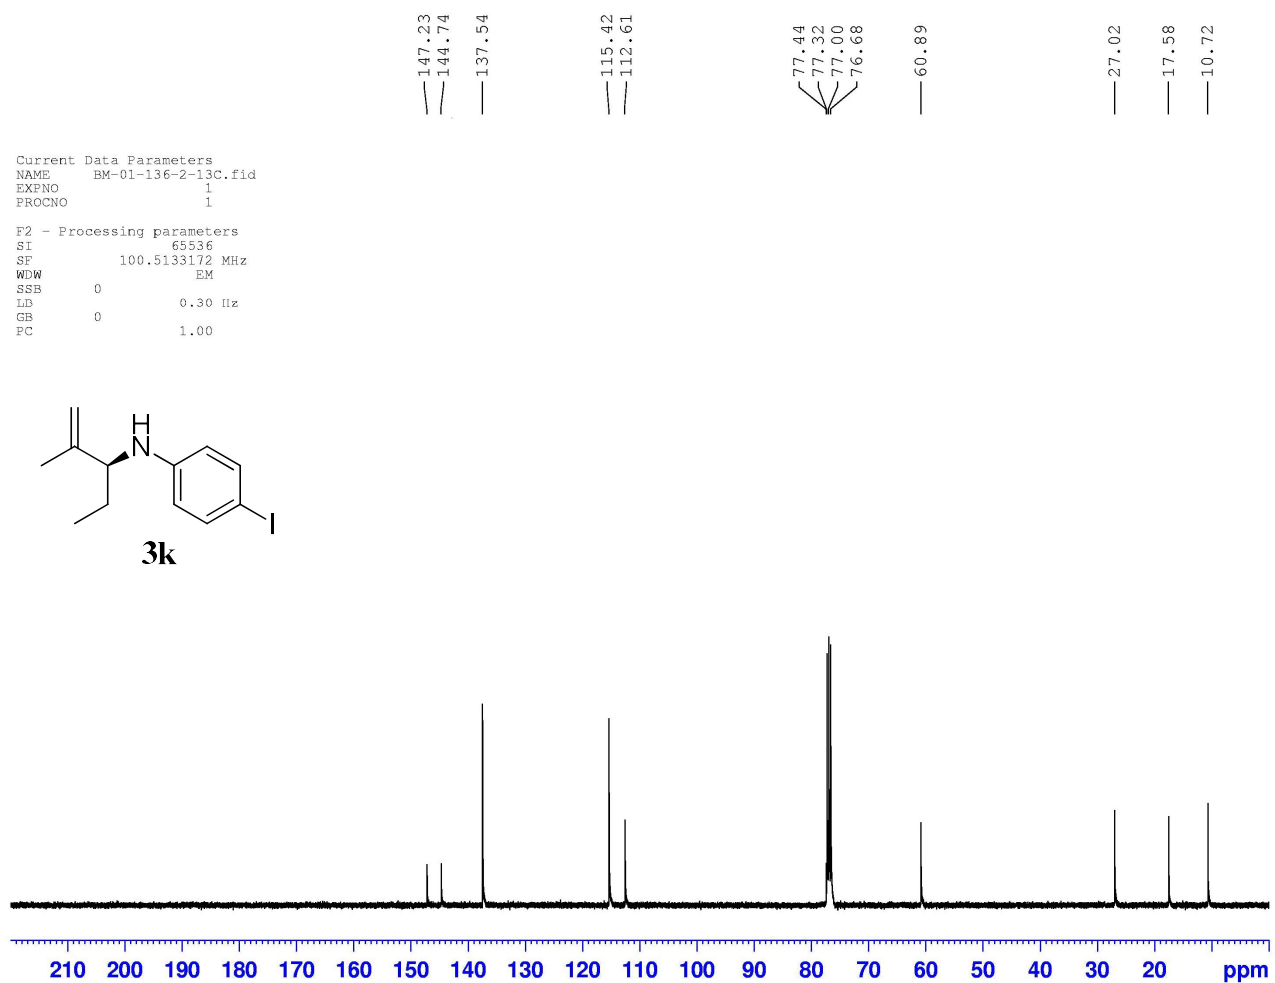

<sup>13</sup>C NMR Spectra of **3k** in CDCl<sub>3</sub>.

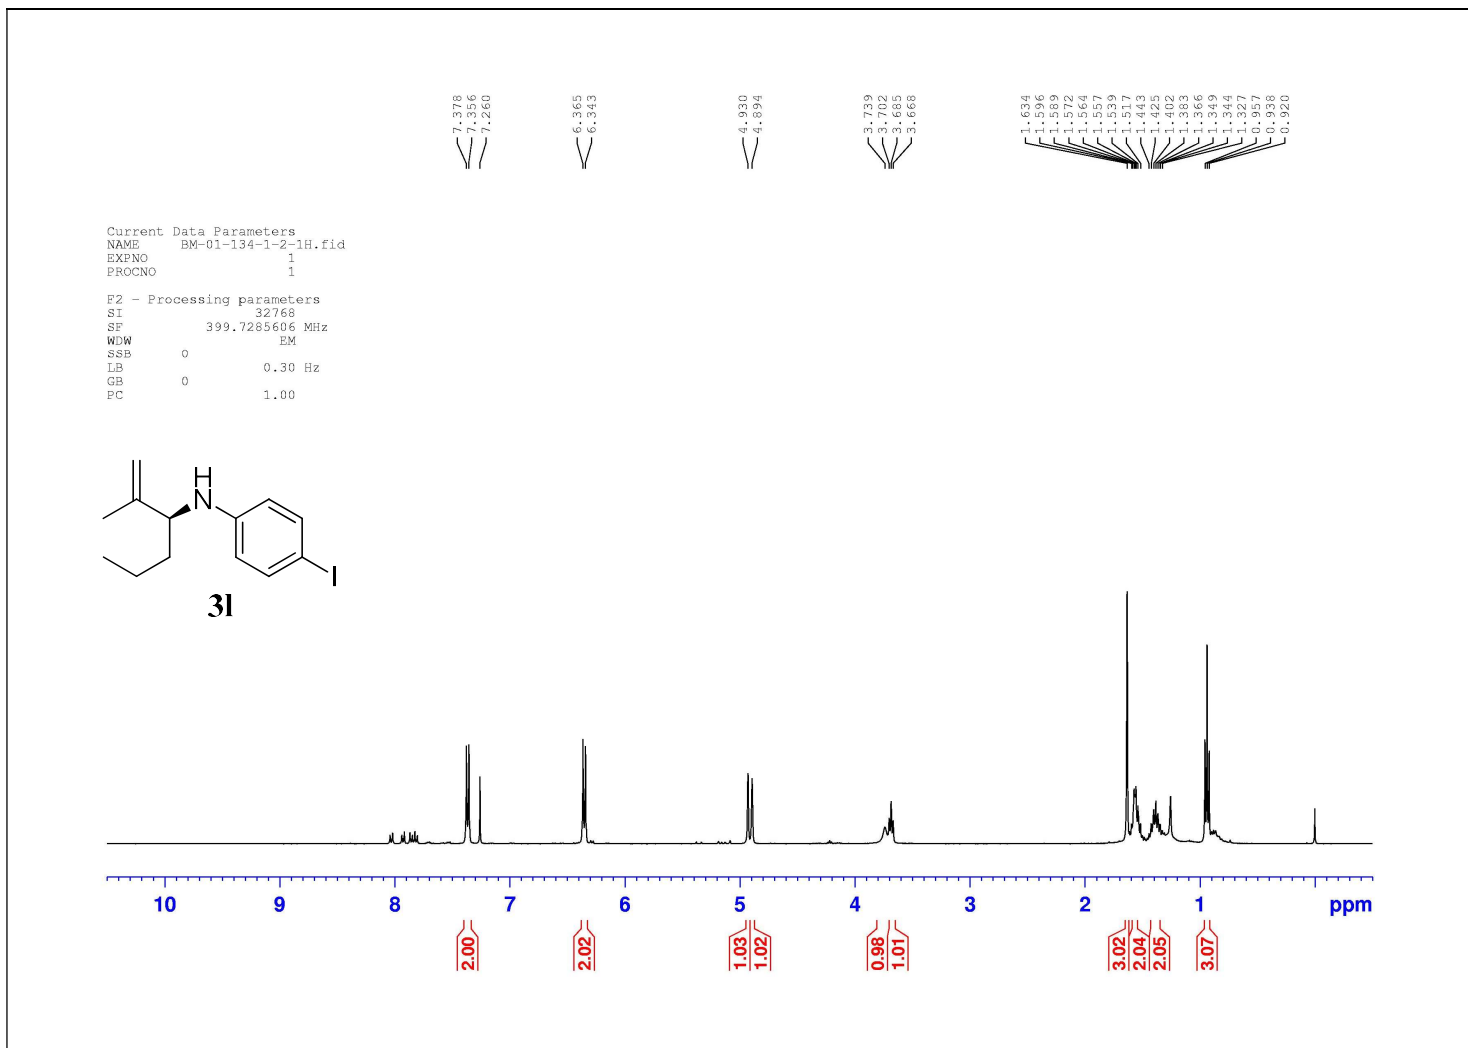

$^1\text{H}$  Spectra of **31** in  $\text{CDCl}_3$ .

Current Data Parameters  
NAME BM-01-134-1-2-13C-1.fid  
EXPNO 1  
PROCNO 1  
F2 - Processing parameters  
SI 65536  
SF 100.5133271 MHz  
WDW EM  
SSB 0  
LB 0.30 Hz  
GB 0  
PC 1.00

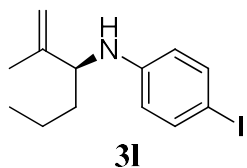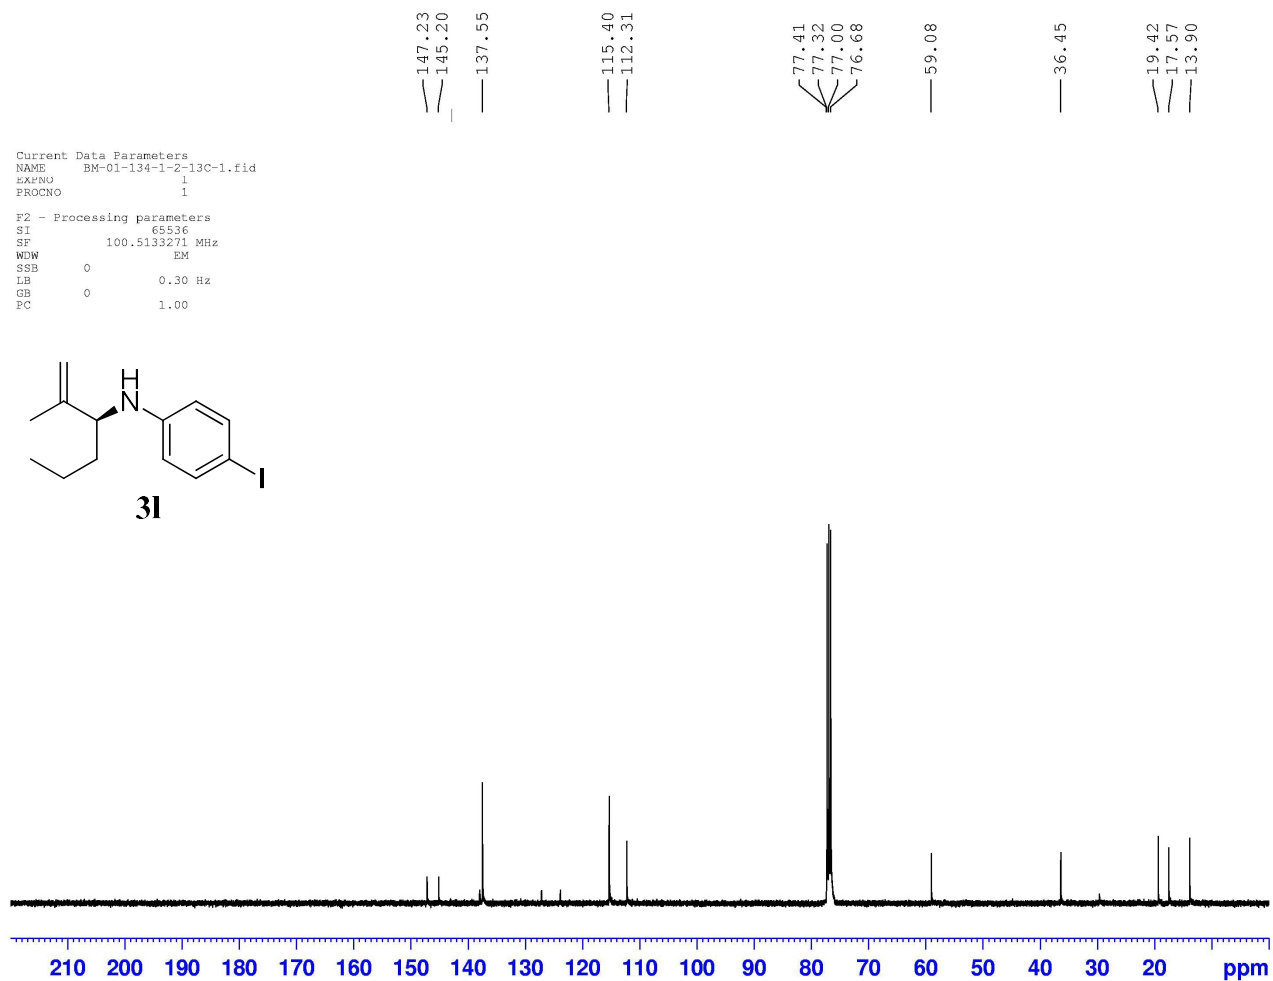

$^{13}\text{C}$  NMR Spectra of **31** in  $\text{CDCl}_3$ .

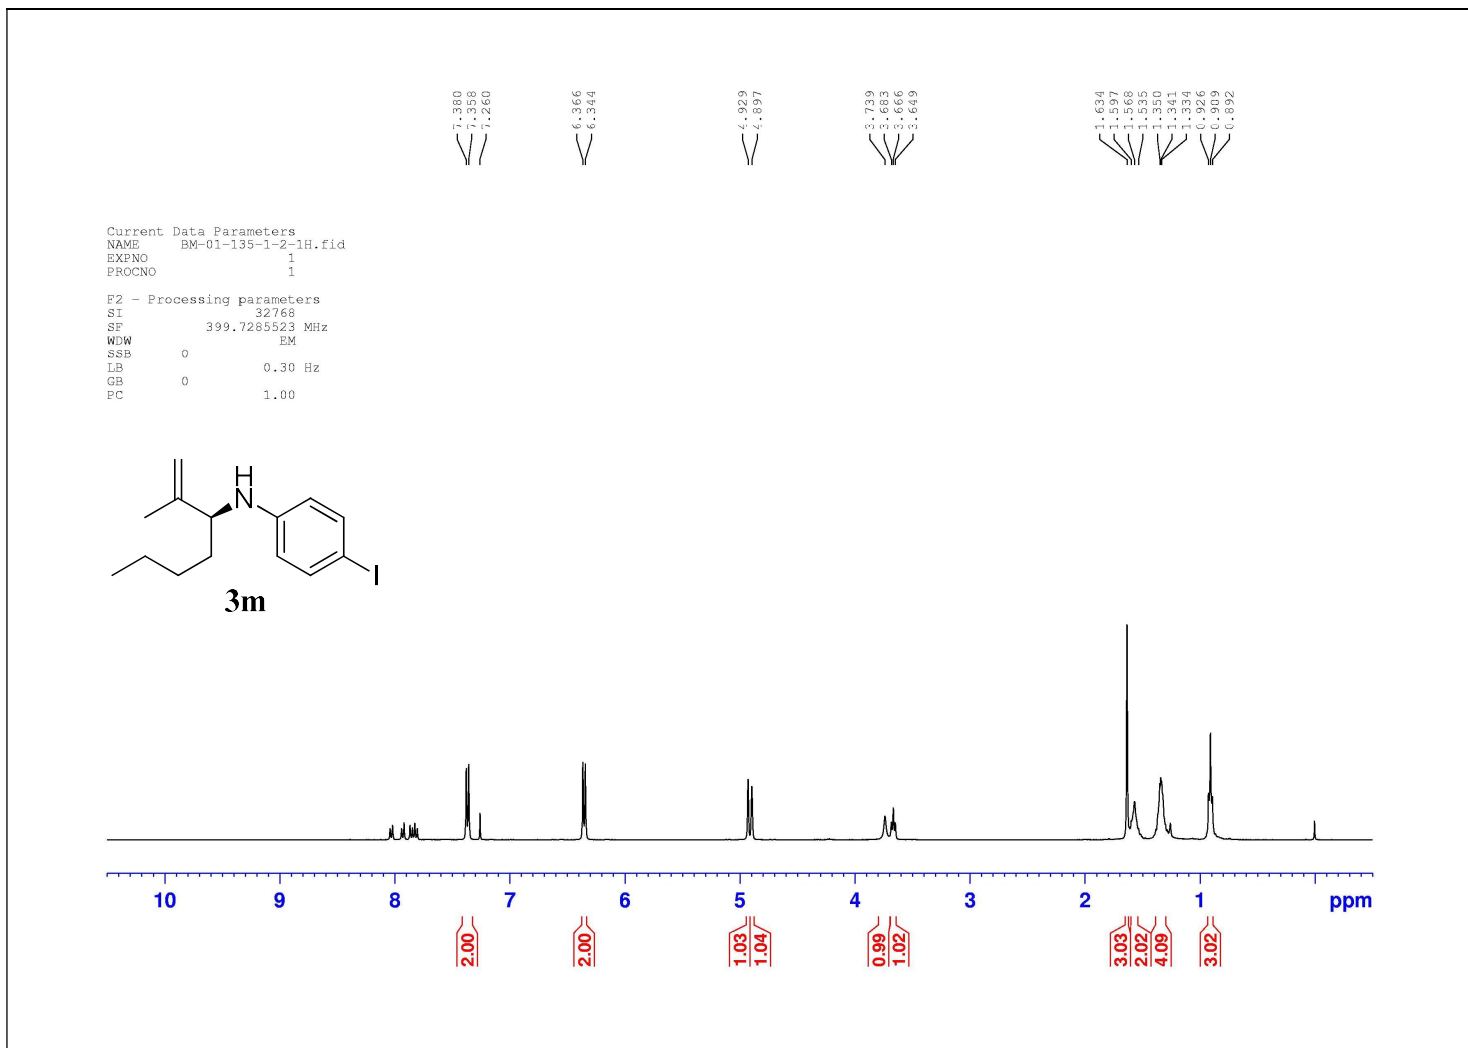

$^1\text{H}$  Spectra of **3m** in  $\text{CDCl}_3$ .

Current Data Parameters  
NAME BM-01-135-1-2-13C-1.fid  
EXPNO 1  
PROCNO 1  
F2 - Processing parameters  
SI 65536  
SF 100.5132728 MHz  
WDW EM  
SSB 0  
LB 0.30 Hz  
GB 0  
PC 1.00

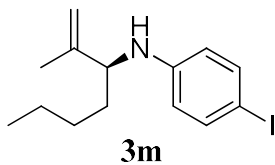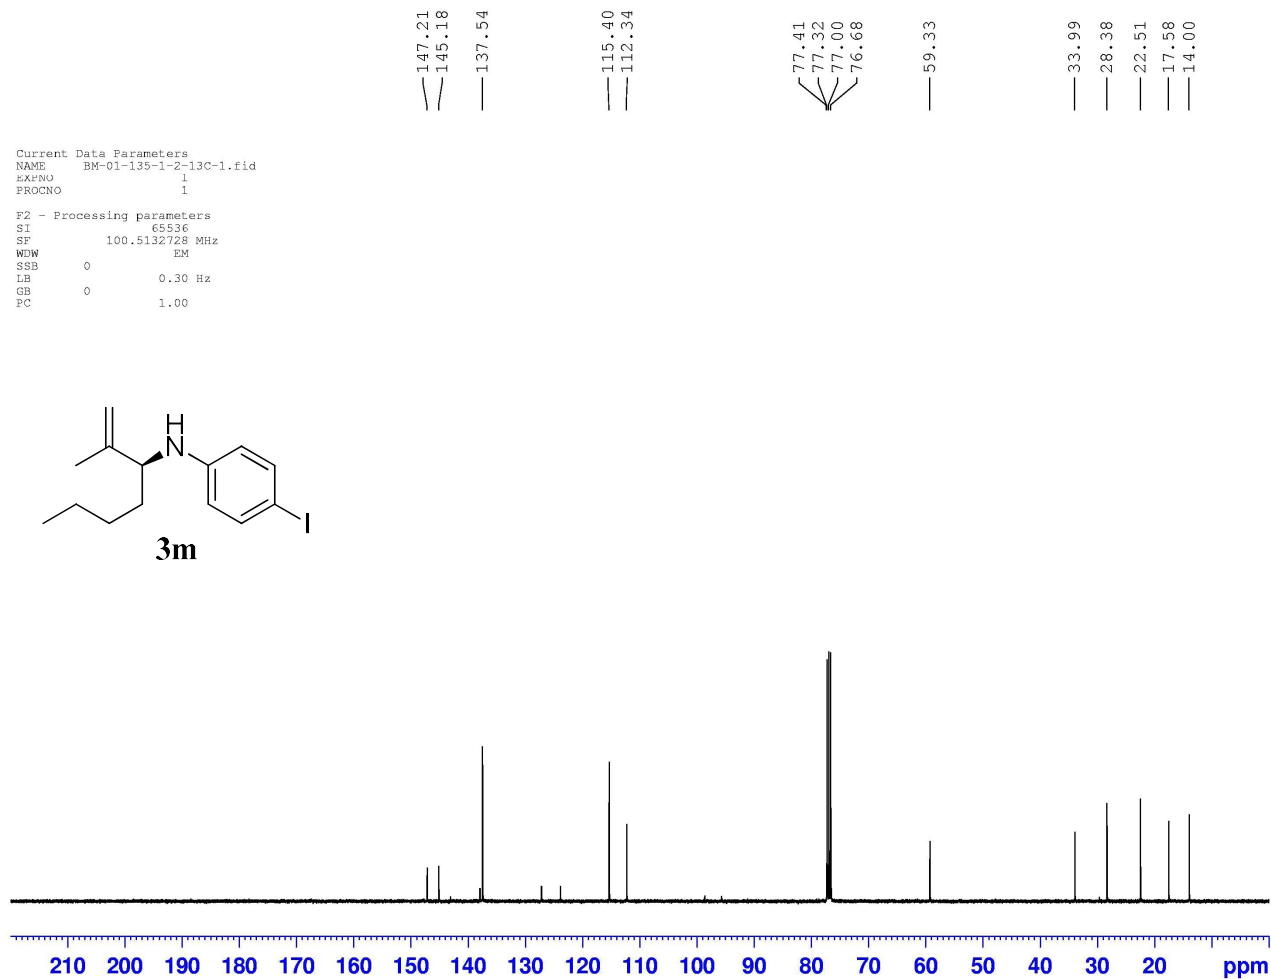

$^{13}\text{C}$  NMR Spectra of **3m** in  $\text{CDCl}_3$ .

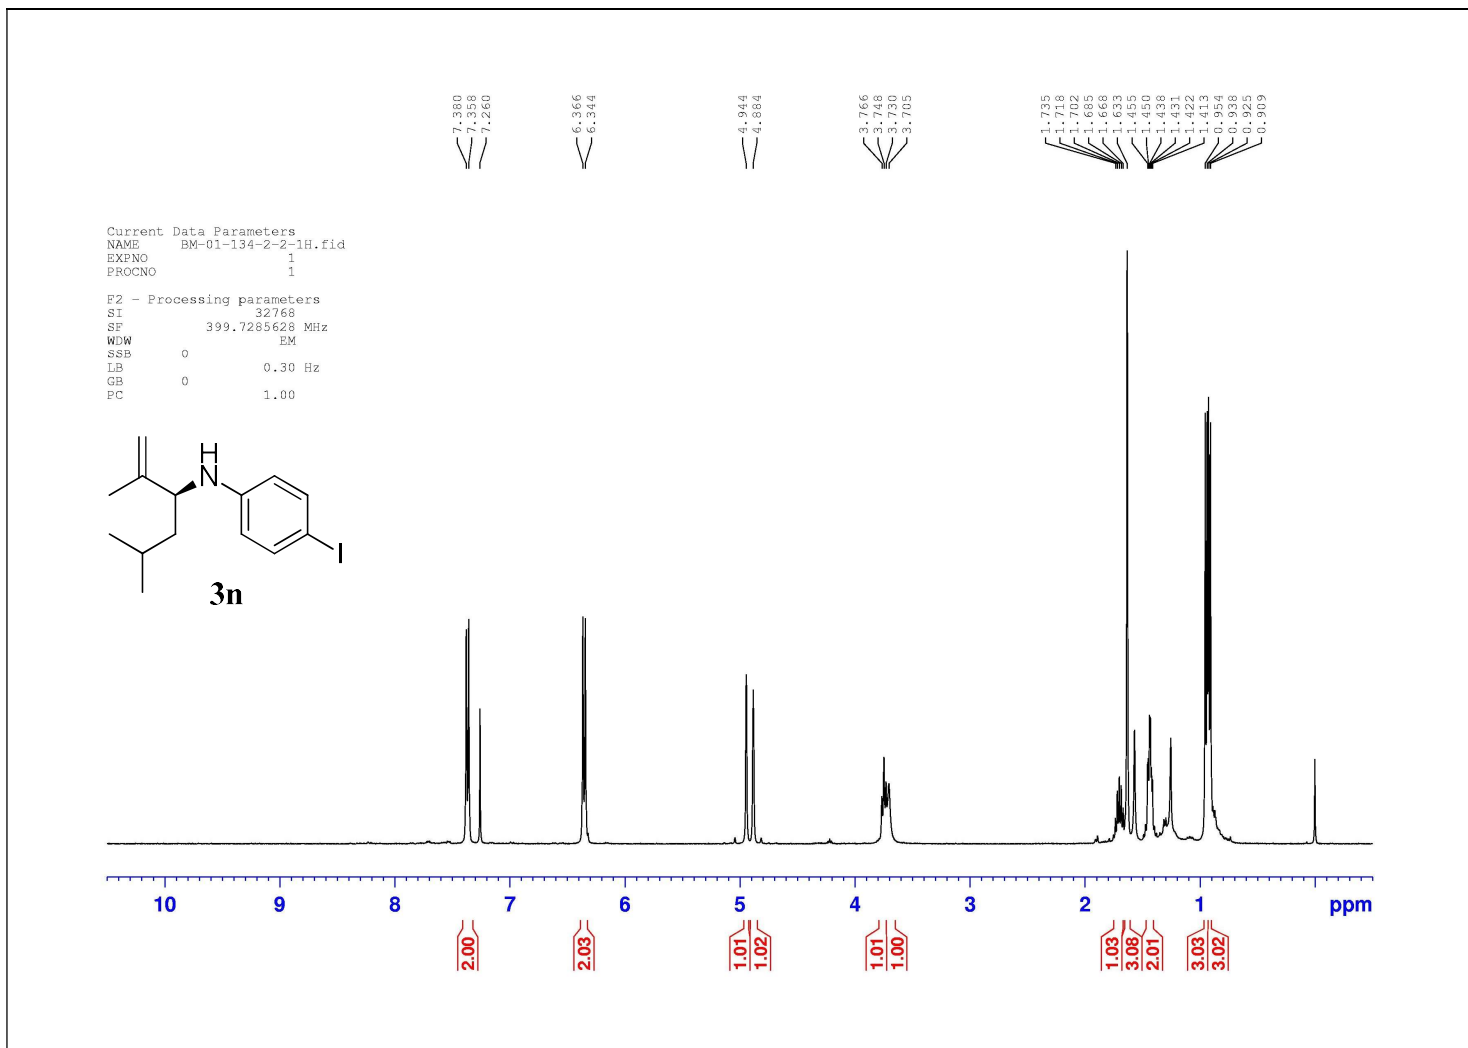

<sup>1</sup>H Spectra of **3n** in CDCl<sub>3</sub>.

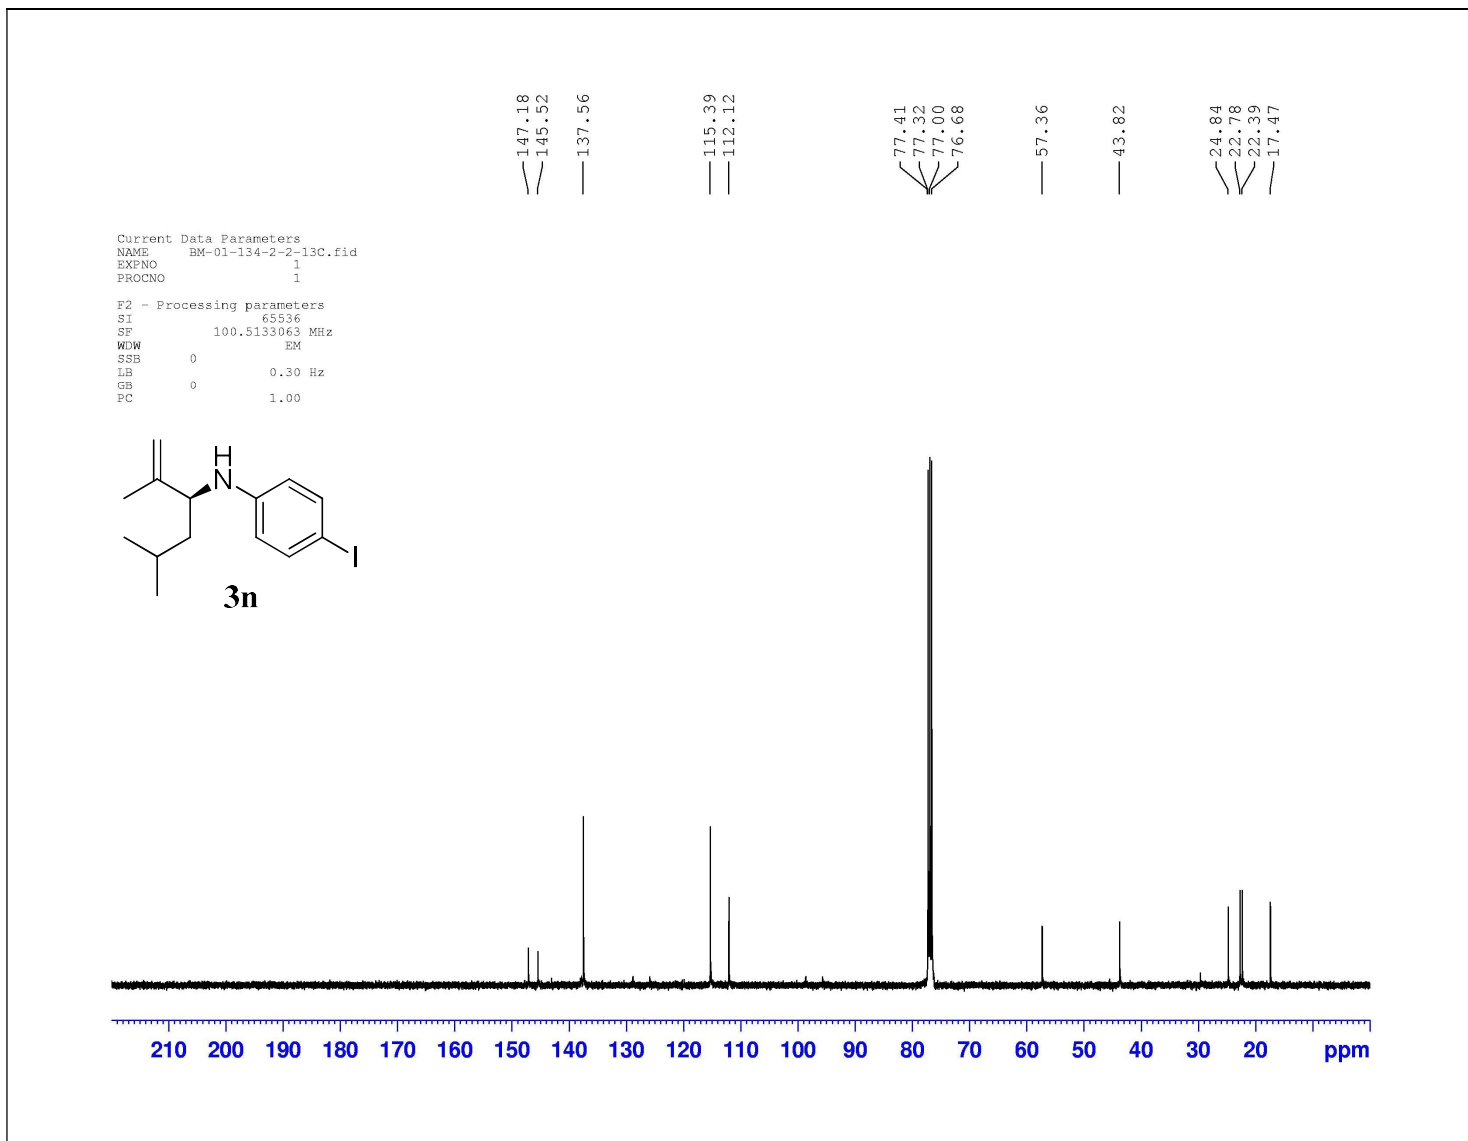

$^{13}\text{C}$  NMR Spectra of **3n** in  $\text{CDCl}_3$ .



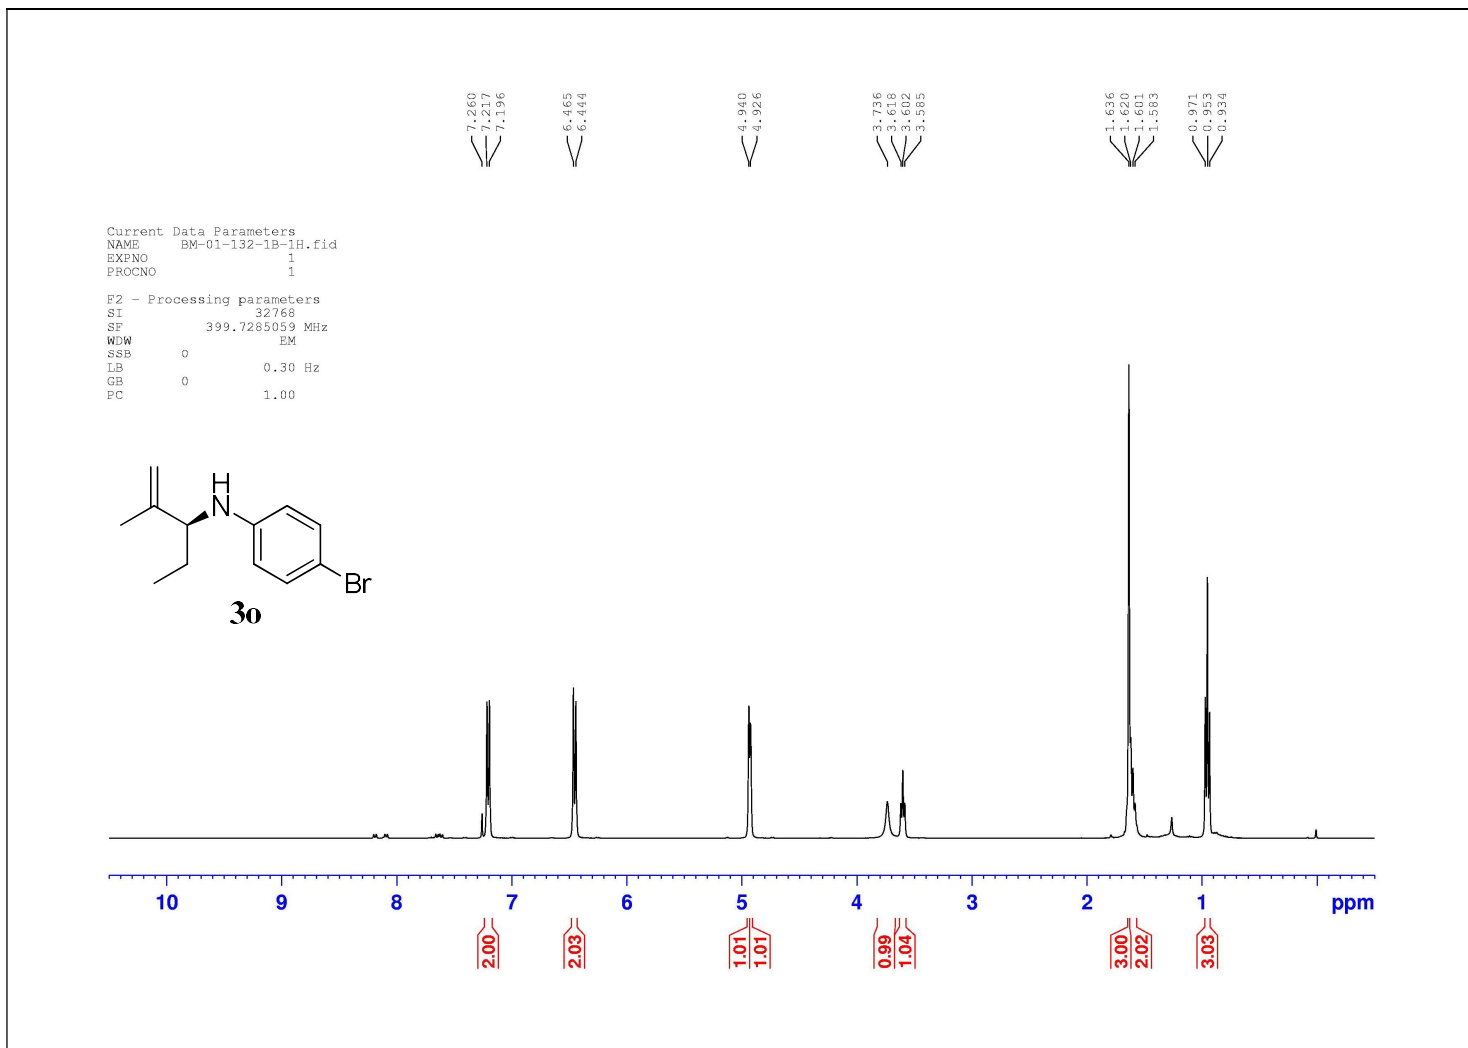

$^1\text{H}$  Spectra of **30** in  $\text{CDCl}_3$ .

Current Data Parameters  
NAME BM-01-132-1B-13C-1.fid  
EXPNO 1  
PROCNO 1  
F2 - Processing parameters  
SI 65536  
SF 100.5133087 MHz  
WDW EM  
SSB 0  
LB 0.30 Hz  
GR 0  
PC 1.00

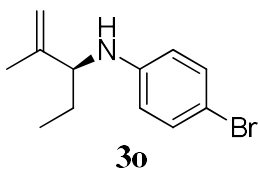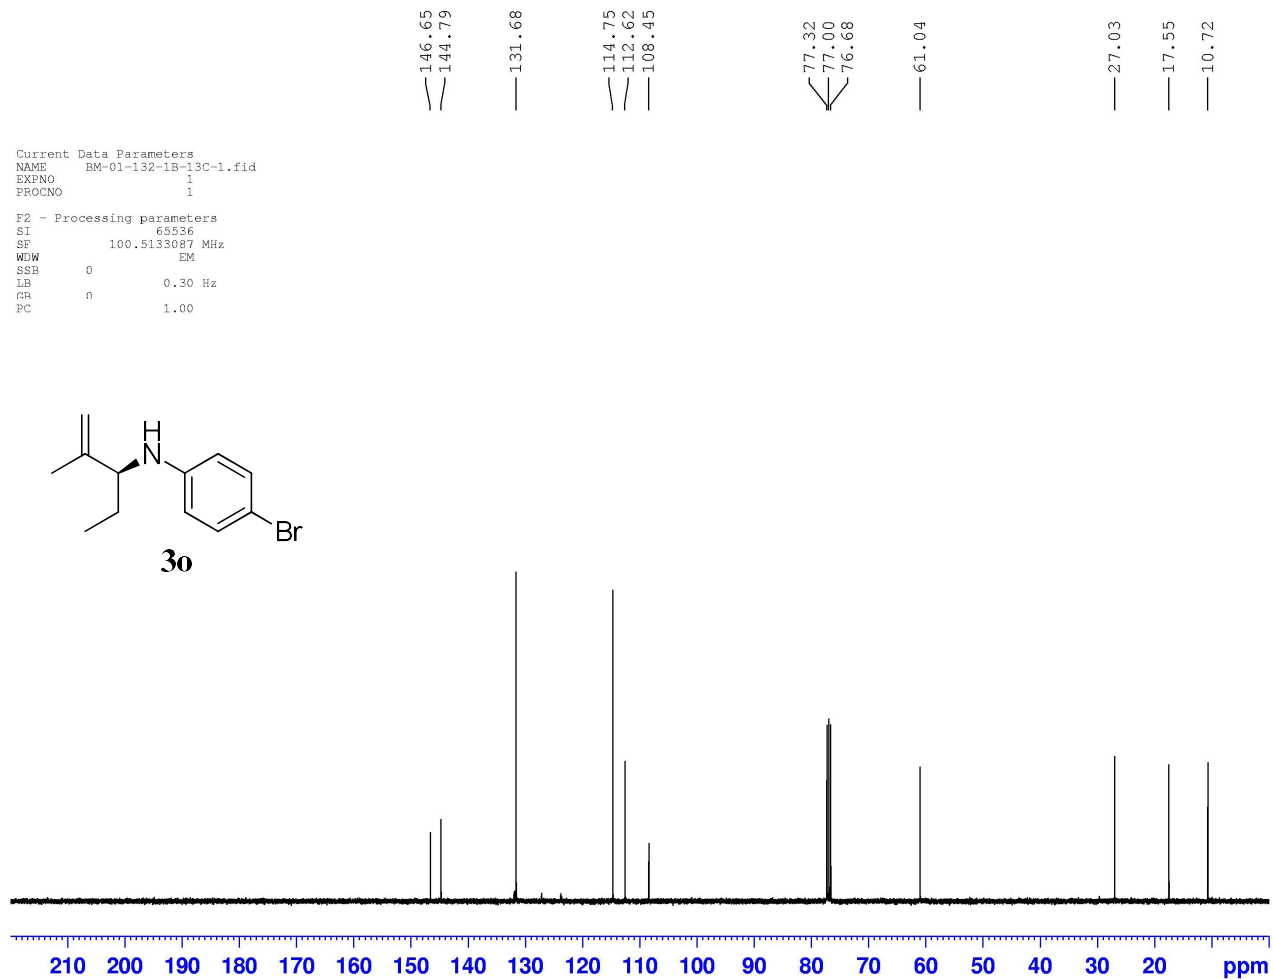

$^{13}\text{C}$  NMR Spectra of **30** in  $\text{CDCl}_3$ .

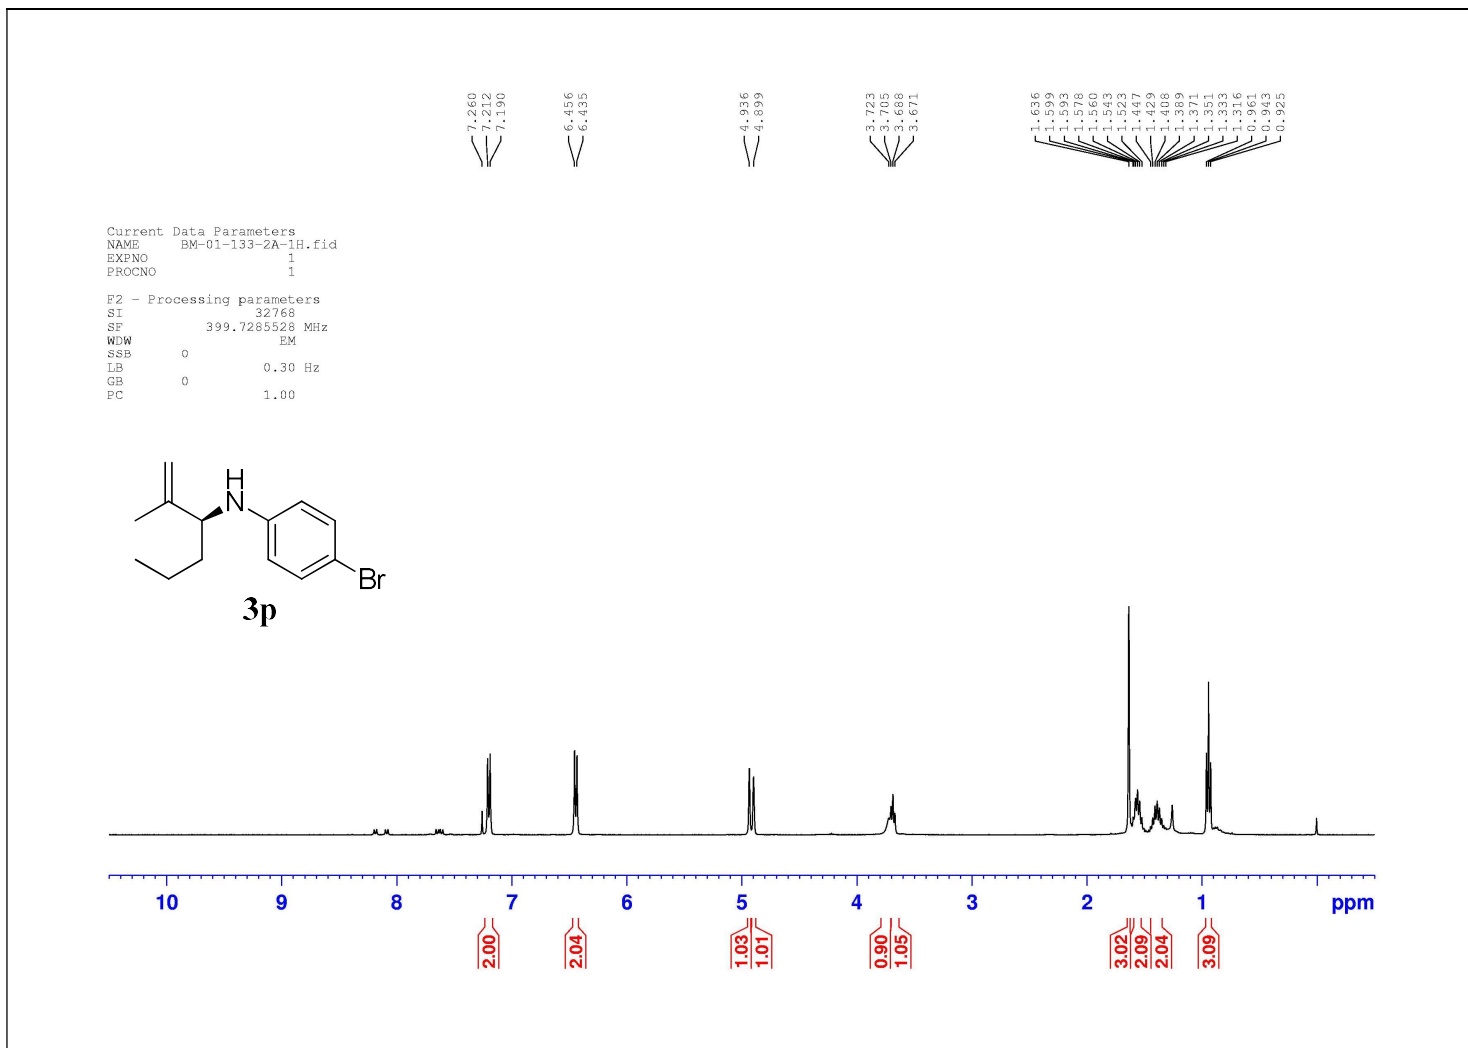

$^1\text{H}$  Spectra of **3p** in  $\text{CDCl}_3$ .

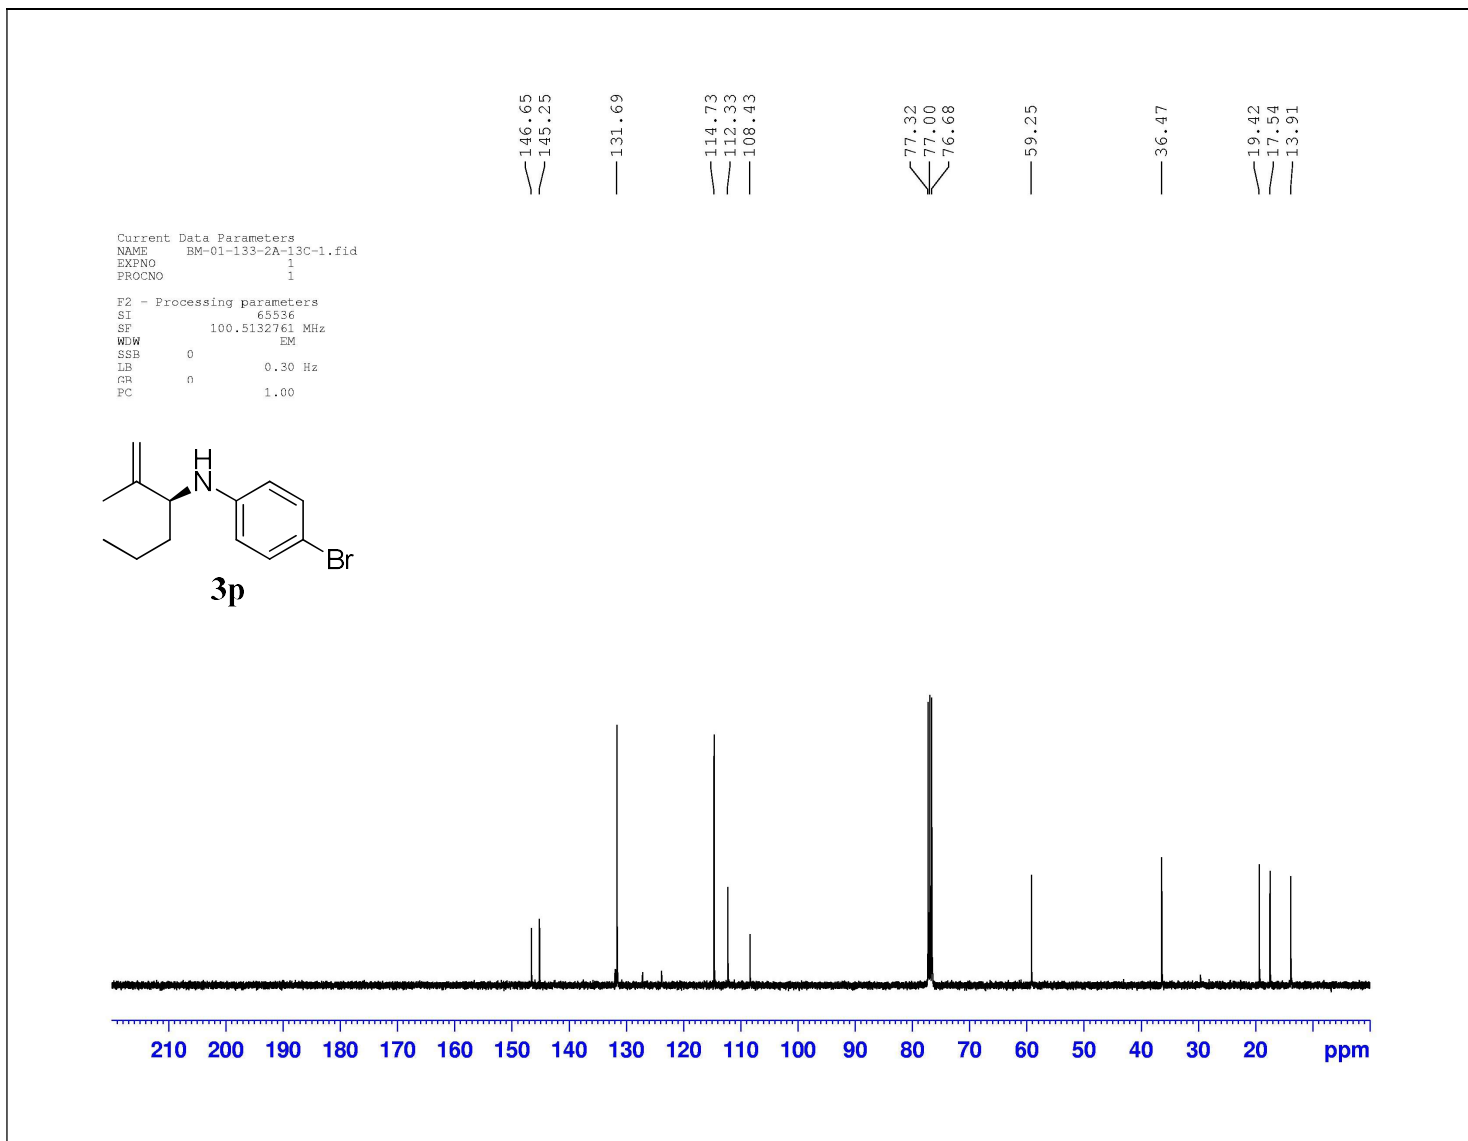

$^{13}\text{C}$  NMR Spectra of **3p** in  $\text{CDCl}_3$ .

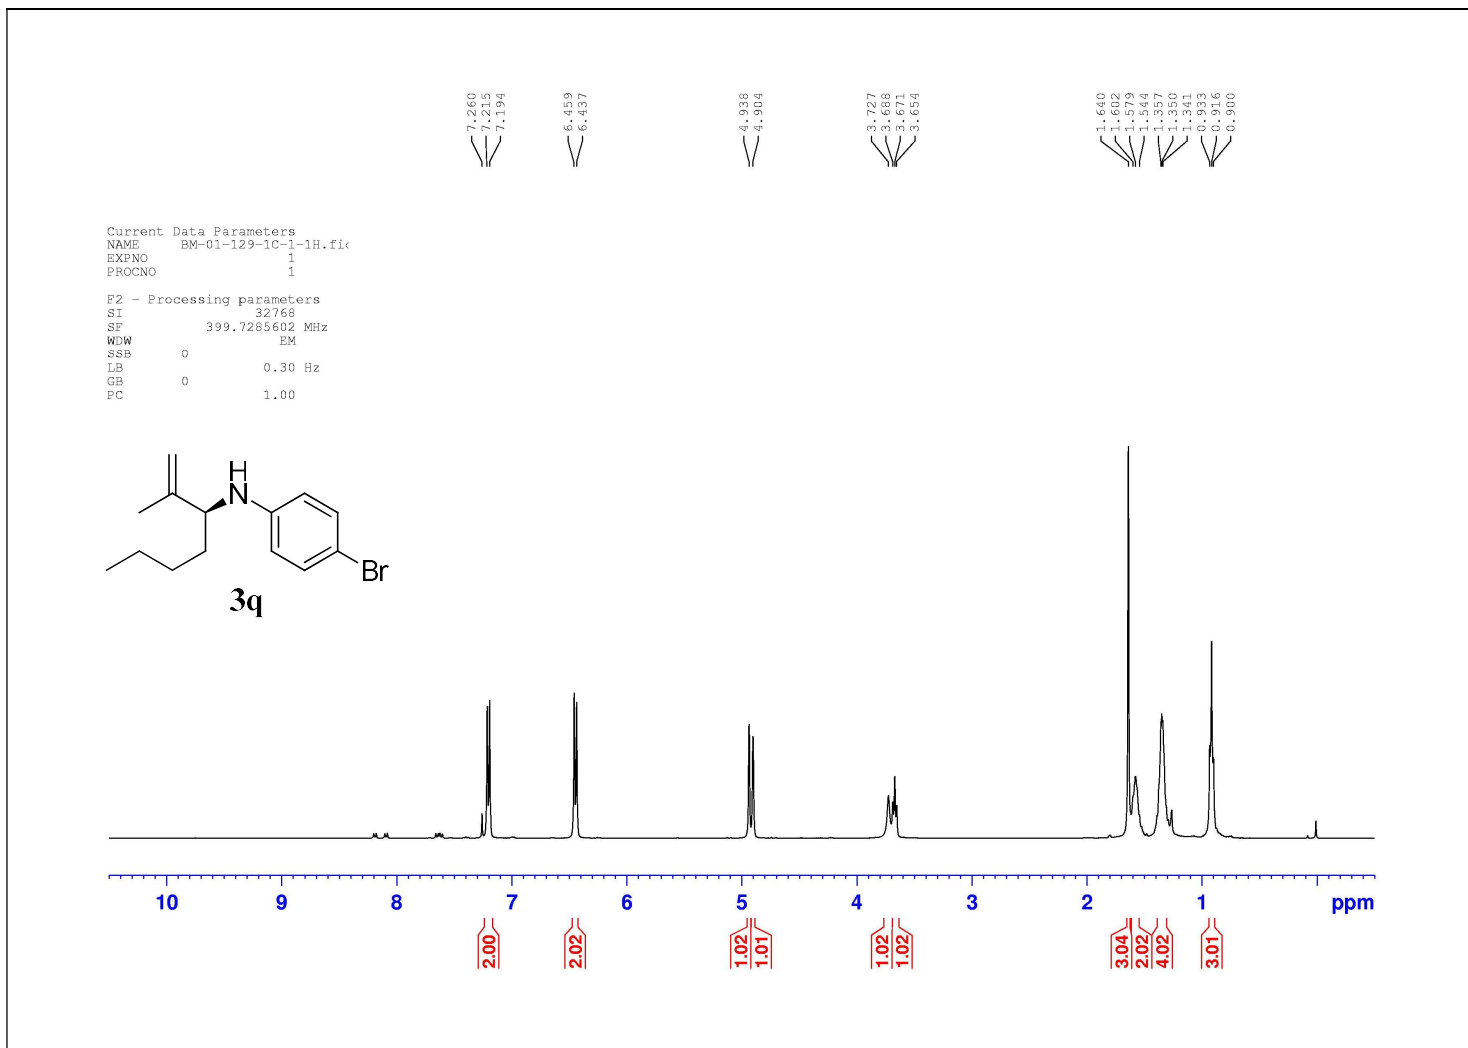

$^1\text{H}$  Spectra of **3q** in  $\text{CDCl}_3$ .

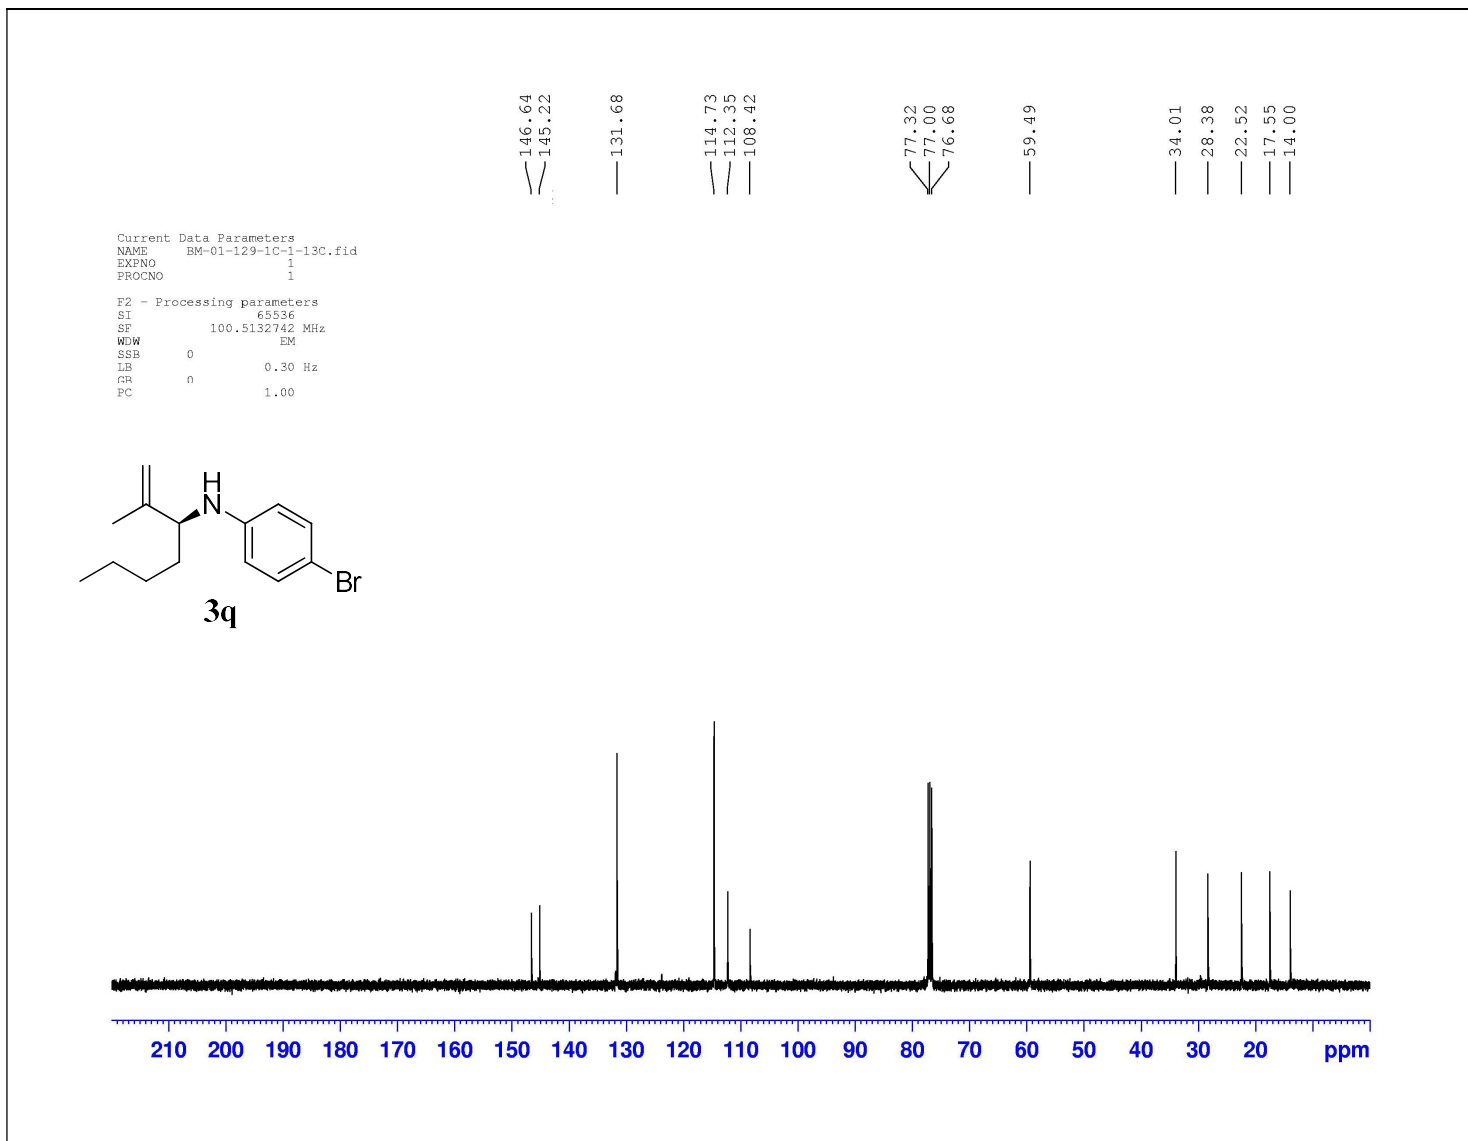

$^{13}\text{C}$  NMR Spectra of **3q** in  $\text{CDCl}_3$ .

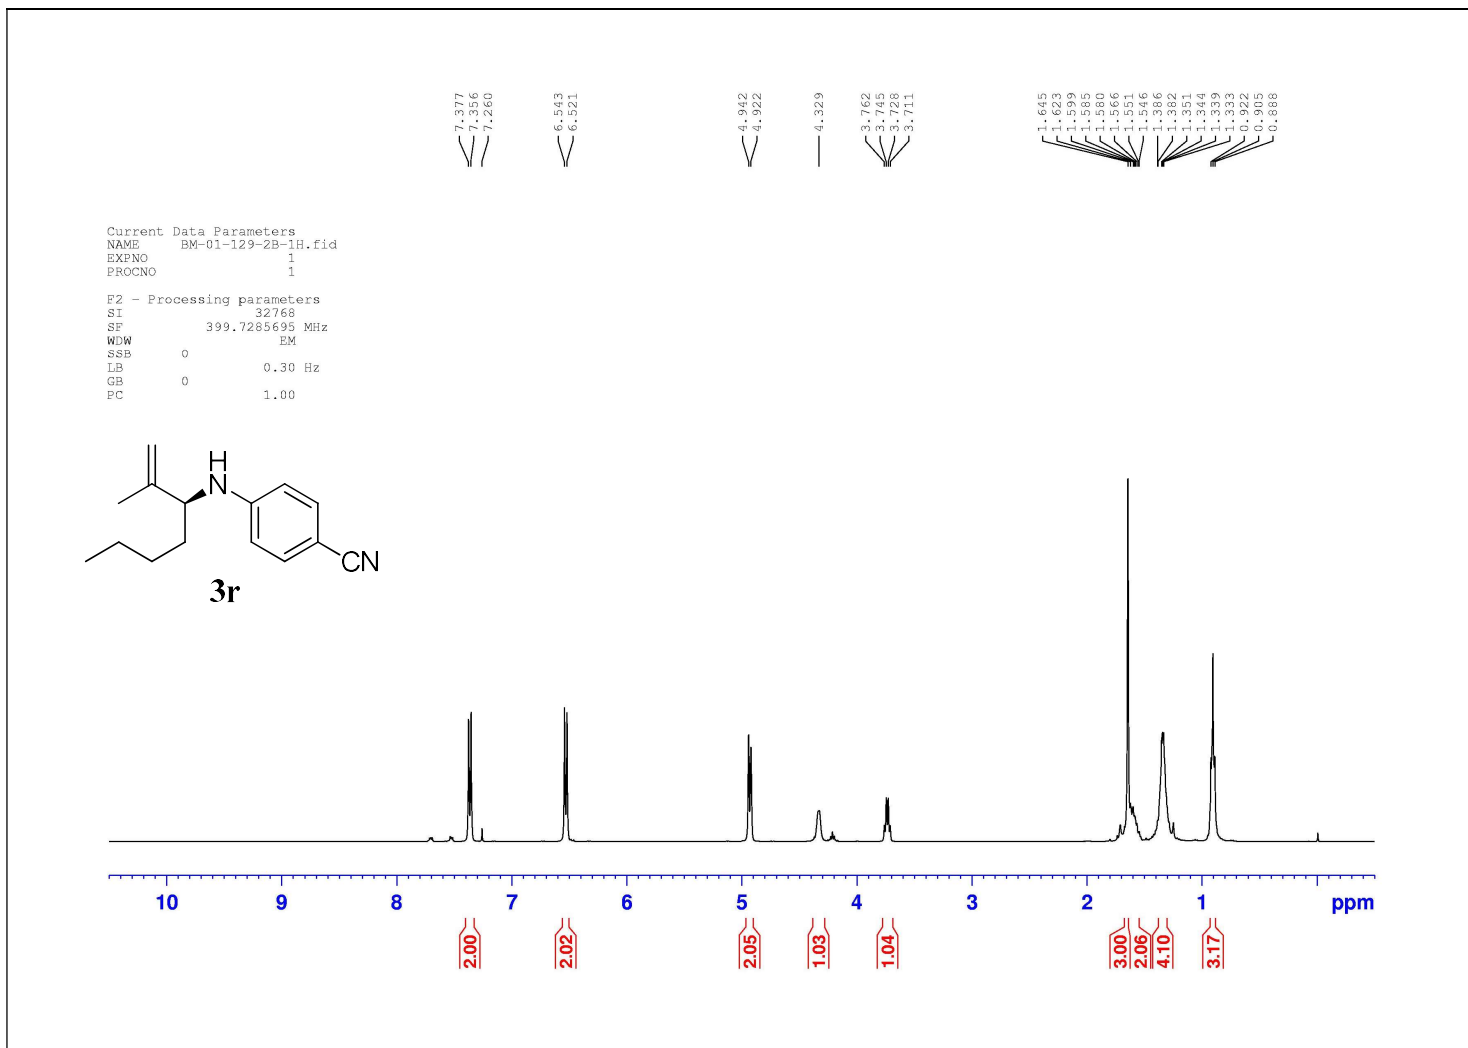

$^1\text{H}$  Spectra of **3r** in  $\text{CDCl}_3$ .

Current Data Parameters  
NAME BM-01-129-2B-13C.fid  
EXPNO 1  
PROCNO 1

F2 - Processing parameters  
SI 65536  
SF 100.5132742 MHz  
WDW EM  
SSB 0  
LB 0.30 Hz  
GB 0  
PC 1.00

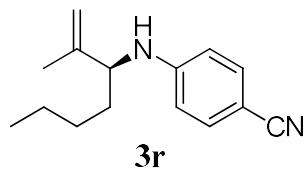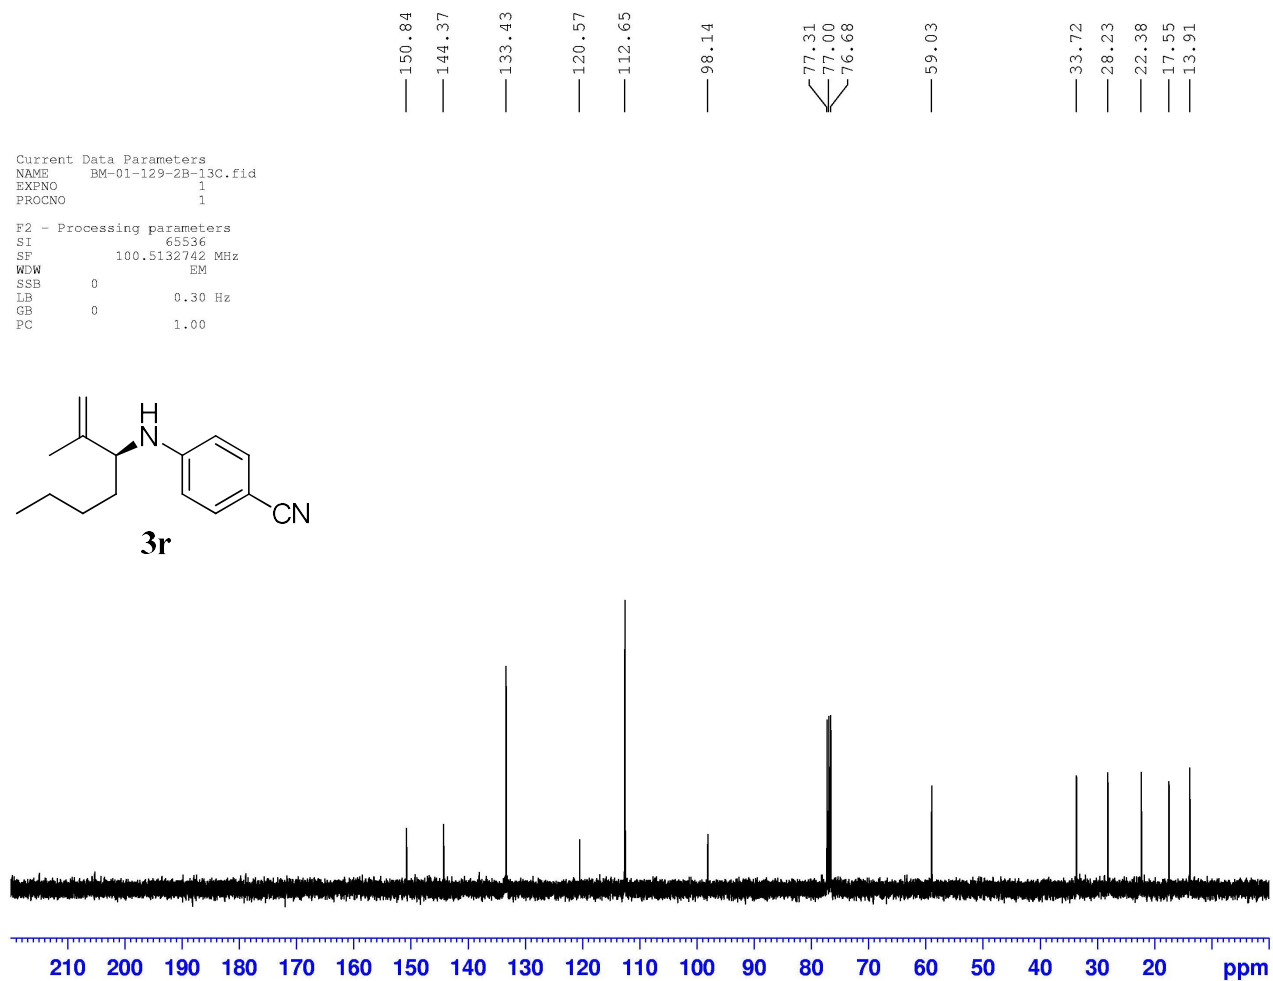

$^{13}\text{C}$  NMR Spectra of **3r** in  $\text{CDCl}_3$ .



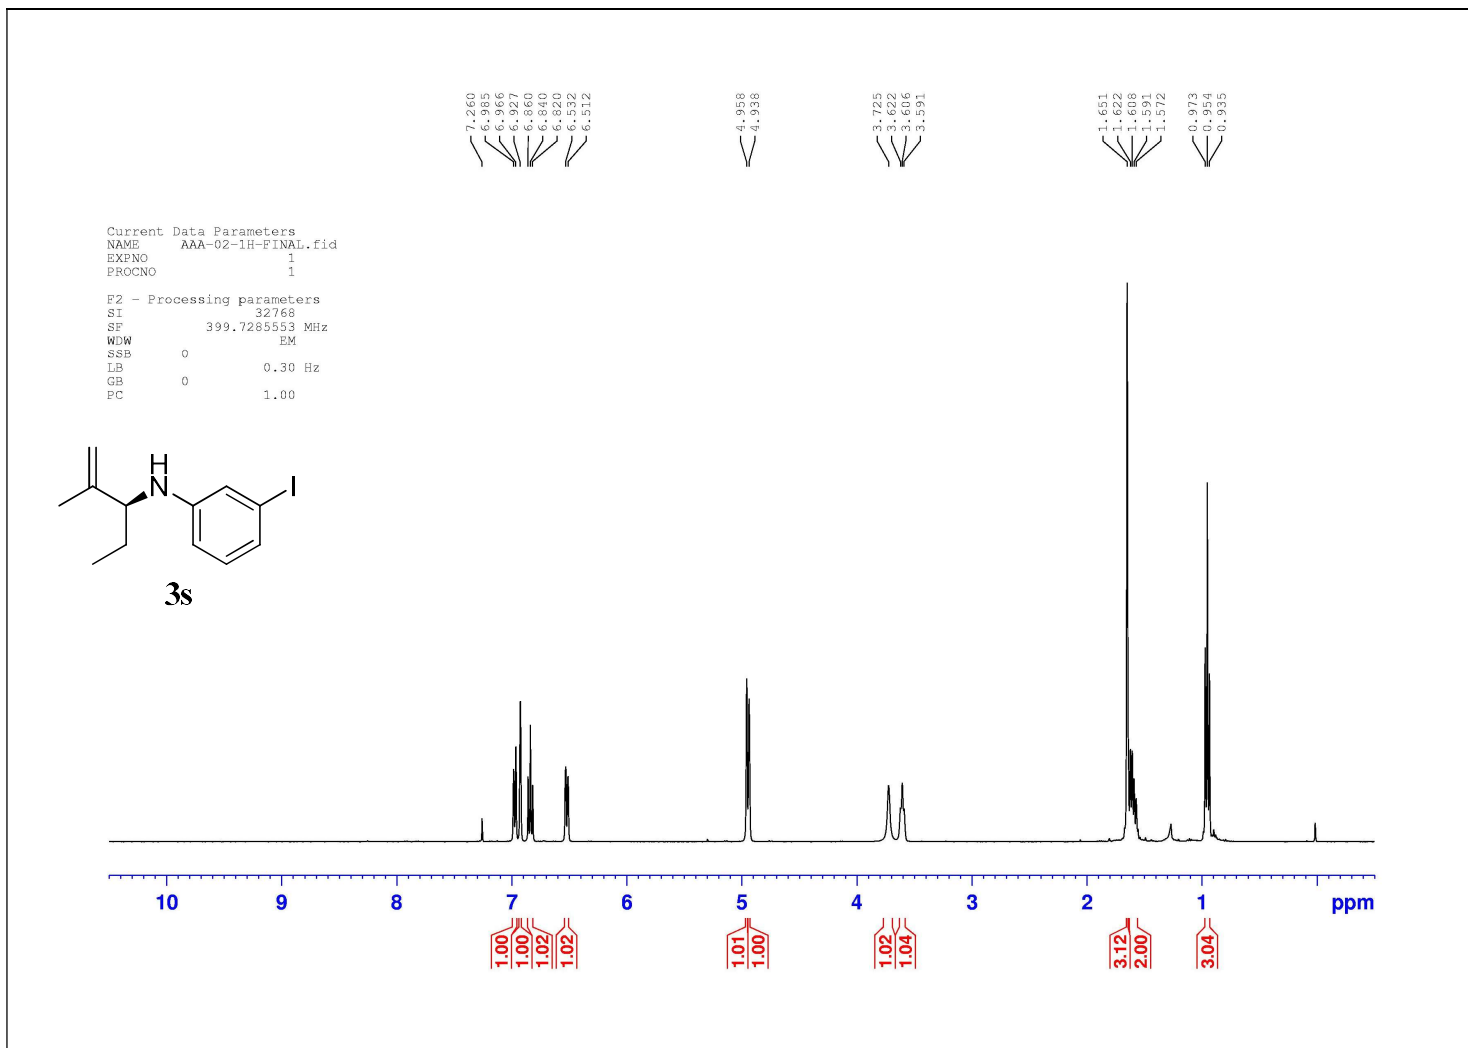

$^1\text{H}$  Spectra of **3s** in  $\text{CDCl}_3$ .

Current Data Parameters  
NAME AAA-02-13C-FINAL.fid  
EXPNO 1  
PROCNO 1  
F2 - Processing parameters  
SI 65536  
SF 100.5132752 MHz  
WDW EM  
SSB 0  
LB 0.30 Hz  
GB 0  
PC 1.00

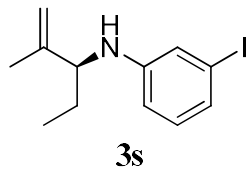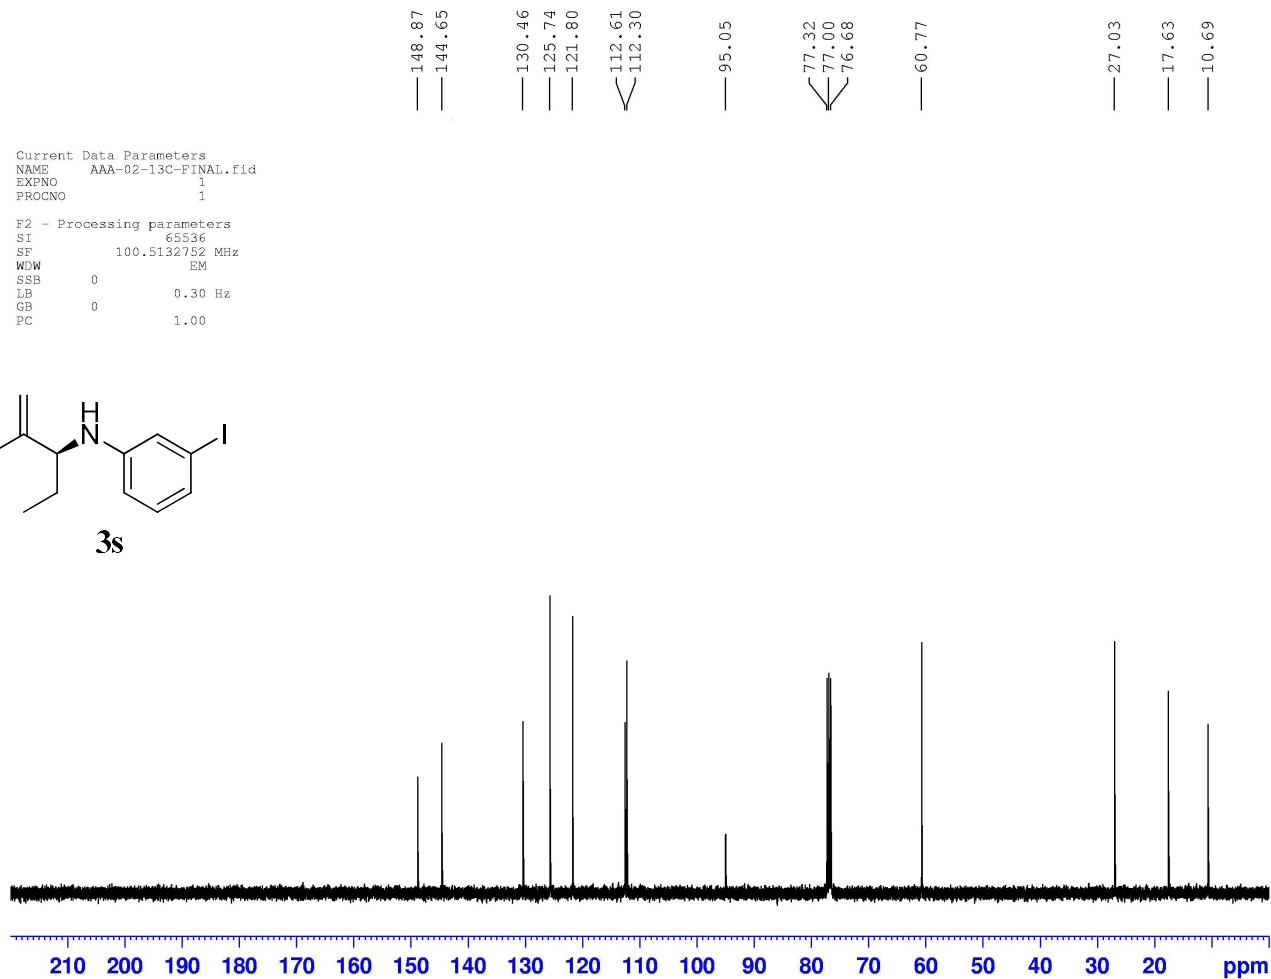

<sup>13</sup>C NMR Spectra of **3s** in CDCl<sub>3</sub>.

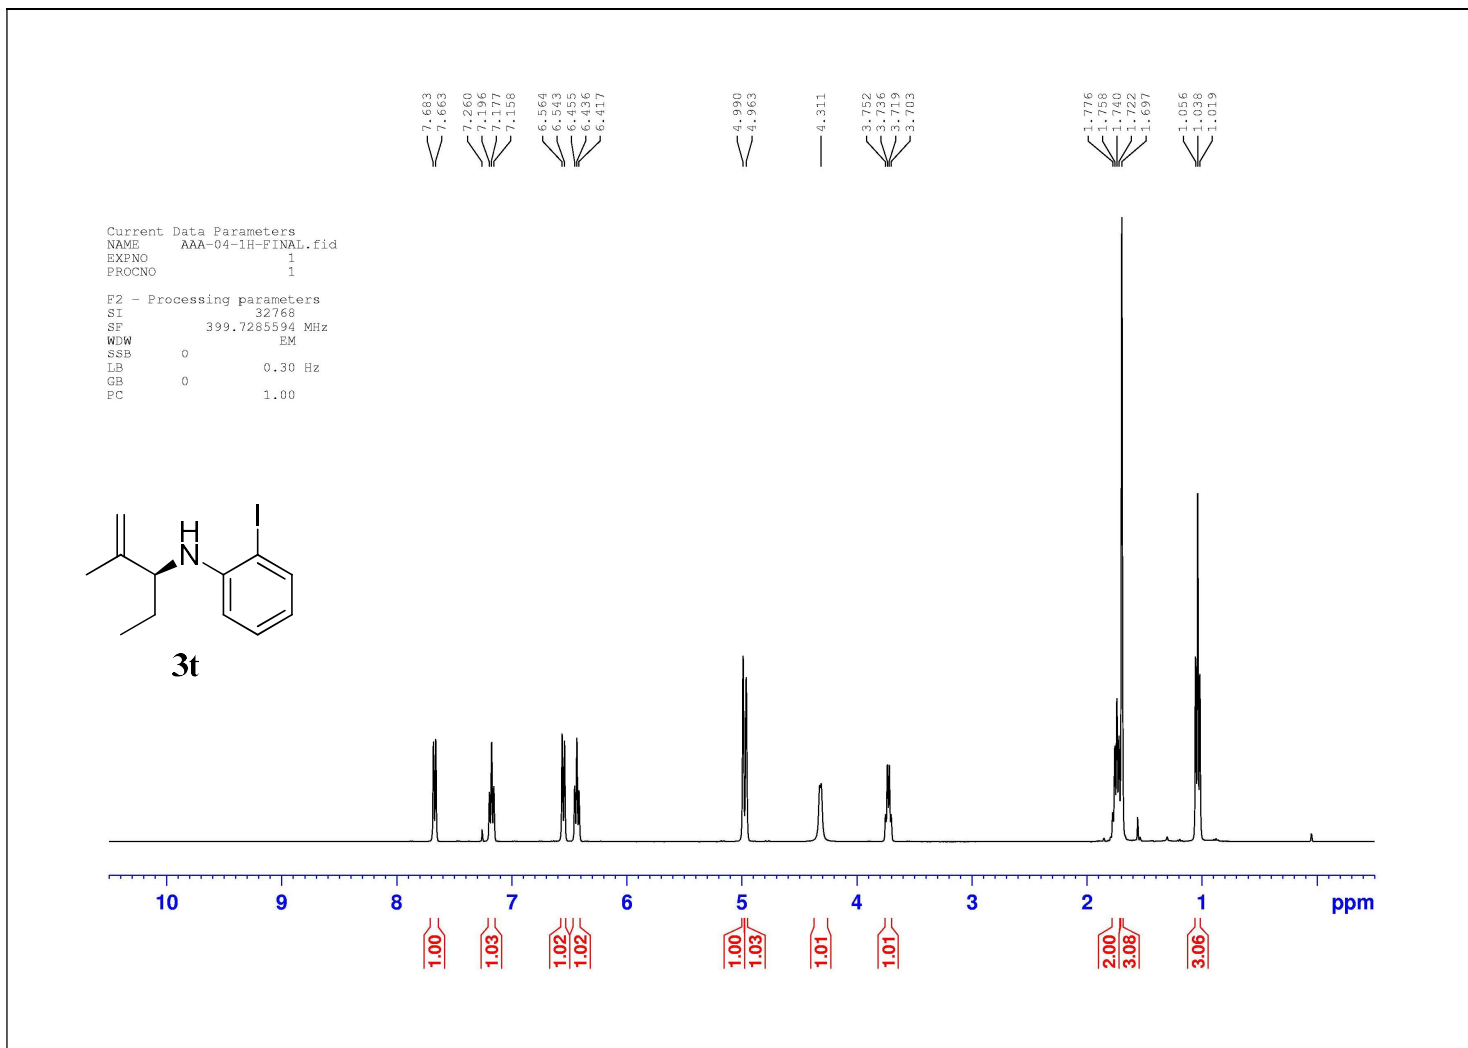

$^1\text{H}$  Spectra of **3t** in  $\text{CDCl}_3$ .

Current Data Parameters  
NAME AAA-04-13C-FINAL.fid  
EXPNO 1  
PROCNO 1

F2 - Processing parameters  
SI 65536  
SF 100.5132752 MHz  
WDW EM  
SSB 0  
LB 0.30 Hz  
GB 0  
PC 1.00

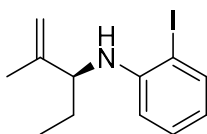

**3t**

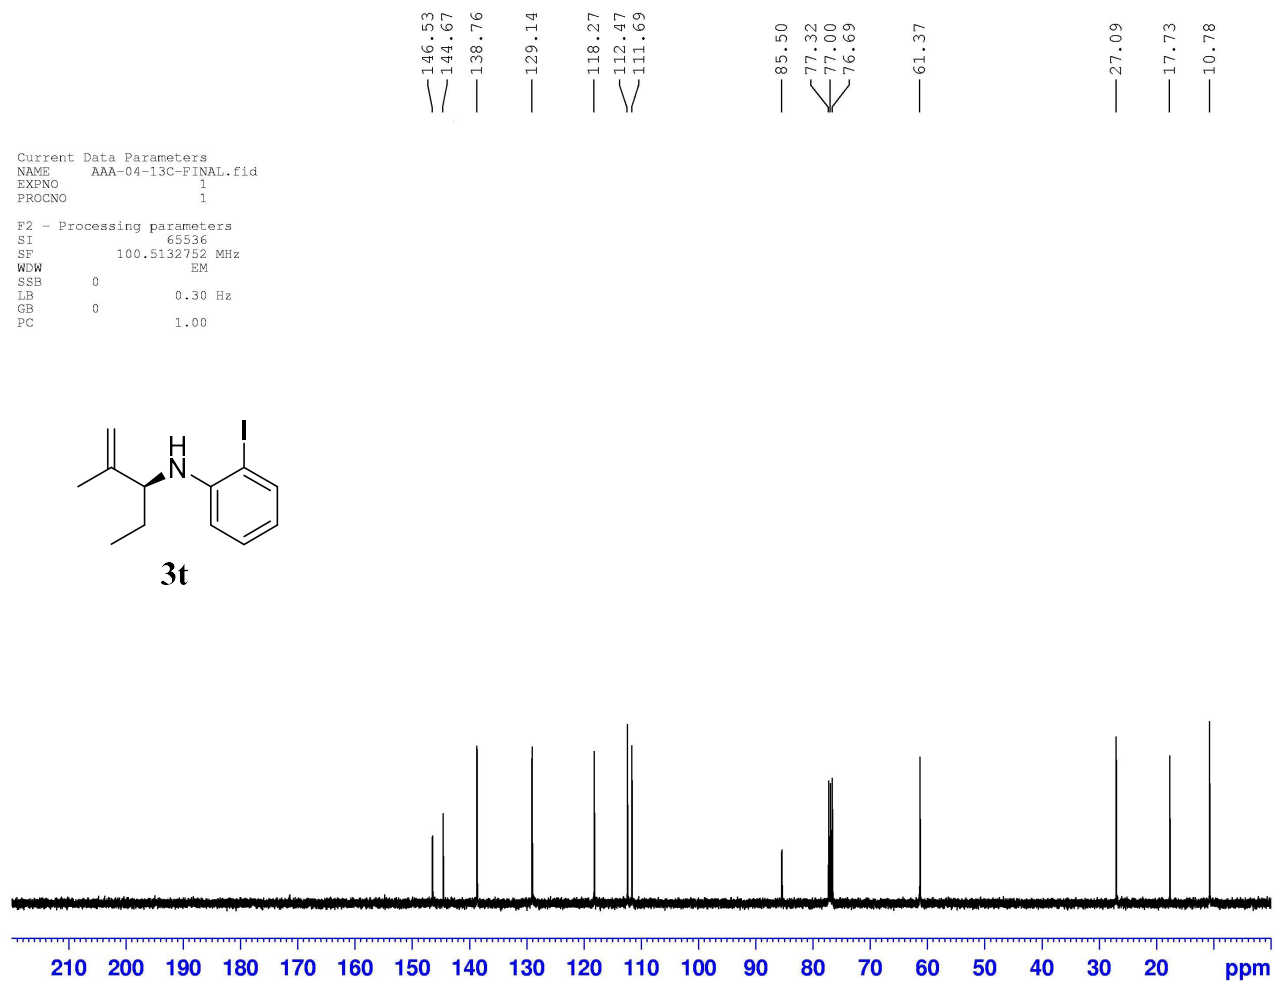

$^{13}\text{C}$  NMR Spectra of **3t** in  $\text{CDCl}_3$ .
